# Supplementary material for: The presence of Pseudogymnoascus destructans, a fungal pathogen of bats, correlates with changes in microbial metacommunity structure
Source: PubMed Central journal article supplement (PMC8175404; doi:10.1038/s41598-021-91118-1), 2021-06-03
Supplement: 41598_2021_91118_MOESM1_ESM.pdf [file 41598_2021_91118_MOESM1_ESM.pdf]

## Supplemental File

**Title: The presence of *Pseudogymnoascus destructans*, a fungal pathogen of bats, correlates with changes in microbial metacommunity structure**

Matthew Grisnik<sup>1</sup>, Joshua B Grinath<sup>2</sup>, Donald M Walker<sup>1\*</sup>

<sup>1</sup>Middle Tennessee State University, Department of Biology, Murfreesboro, Tennessee 37132, USA

<sup>2</sup>Idaho State University, Department of Biological Sciences, Pocatello, Idaho 83209, USA

\*Corresponding author

Donald M. Walker, PhD

[Donald.Walker@mtsu.edu](mailto:Donald.Walker@mtsu.edu)

615-904-8382

## Table of Contents

|                                             |    |
|---------------------------------------------|----|
| Supplemental File 1A mothur code            | 2  |
| Supplemental File 1B Sampling Scheme        | 4  |
| Supplemental File 1C R code                 | 5  |
| Supplemental File 1D Metadata               | 66 |
| Supplemental File 1E Modeling Results       | 72 |
| Supplemental File 1F Compositional Analysis | 80 |
| Supplemental File 1G Betadisper Results     | 88 |

## Supplemental File 1A mothur code

Linux version

Using ReadLine

mothur v.1.42.1

Last updated: 01/09/2020

by

Patrick D. Schloss

Department of Microbiology & Immunology

University of Michigan

<http://www.mothur.org>

When using, please cite:

Schloss, P.D., et al., Introducing mothur: Open-source, platform-independent, community-supported software for describing and comparing microbial communities. *Appl Environ Microbiol*, 2009.

75(23):7537-41.

Distributed under the GNU General Public License

Type 'help()' for information on the commands that are available

For questions and analysis support, please visit our forum at <https://forum.mothur.org>

Type 'quit()' to exit program

[NOTE]: Setting random seed to 19760620.

Interactive Mode

```
mothur > make.contigs(file=200109_stability.txt, processors=30)
```

```
mothur > pcr.seqs(fasta=current, group=current, oligos=oligos.txt, pdiffs=1, rdoiffs=3)
```

```
mothur > pcr.seqs(fasta=current, group=current, oligos=oligos.txt, pdiffs=1, rdiffs=3)
```

```
mothur > summary.seqs(fasta=current)
```

```
mothur > screen.seqs(fasta=current, group=current, maxambig=0, maxlength=256, maxhomop=8, minlength=248)
```

```
mothur > summary.seqs(fasta=current)
```

```
mothur > unique.seqs(fasta=current)
```

```
mothur > summary.seqs(fasta=current)
```

```
mothur > count.seqs(name=current, group=current)
```

```
mothur > summary.seqs(count=current)
```

```
mothur > pcr.seqs(fasta=silva.bacteria.fasta, start=11894, end=25319, keepdots=F)
```

```
mothur > system(mv silva.bacteria.pcr.fasta silva.v4.fast)
```

```
mothur > system(mv silva.bacteria.pcr.fasta silva.v4.fasta)
```

```
mothur > system(mv silva.v4.fast silva.v4.fasta)
```

```
mothur > align.seqs(fasta=200109_stability.trim.contigs.pcr.good.unique.fasta, reference=silva.v4.fasta)
```

```
mothur > summary.seqs(fasta=current, count=current)
```

```
mothur > screen.seqs(fasta=current, count=current, start=1968, end=11550)
```

```
mothur > summary.seqs(fasta=current, count=current)
```

```
mothur > filter.seqs(fasta=current, vertical=T, trump=.)
```

```
mothur > summary.seqs(fasta=current, count=current)
```

```
mothur > unique.seqs(fasta=current, count=current)
```

```
mothur > set.current(count=200109_stability.trim.contigs.pcr.good.good.count_table, fasta=200109_stability.trim.contigs.pcr.good.unique.good.filter.fasta, processors=24)
```

```
mothur > unique.seqs(fasta=current, count=current)
```

```
mothur > summary.seqs(fasta=current, count=current)
```

```
mothur > pre.cluster(fasta=current, count=current, diffs=2)
mothur > summary.seqs(fasta=current, count=current)
mothur > chimera.uchime(fasta=current, count=current, dereplicate=t)
mothur > chimera.uchime(fasta=current, count=current, dereplicate=t)
mothur > summary.seqs(count=current)
mothur > remove.seqs(fasta=current, accnos=current)
mothur > summary.seqs(fasta=current, count=current)
mothur > classify.seqs(fasta=current, count=current, reference=silva.nr_v132.pcr.align,
taxonomy=silva.nr_v132.tax, cutoff=80)
mothur > summary.seqs(fasta=current, count=current)
mothur > remove.lineage(fasta=current, count=current, taxonomy=current, taxon=Chloroplast-
Mitochondria-unknown-Archaea-Eukaryota)
mothur > summary.tax(taxonomy=current, count=current)
mothur > cluster.split(fasta=current, count=current, taxonomy=current, splitmethod=classify,
taxlevel=4, cutoff=0.03)
mothur > summary.seqs(fasta=current, count=current)
mothur > make.shared(list=current, count=current, label=0.03)
mothur > get.groups(shared=current, groups=Negativelib1-Negativeplate9-Negativeplate8-
Negativeplate6-Negativeplate5-Negativeplate4-Negativelib2-Negativelib3)
mothur > remove.rare(shared=current, nseqs=5)
mothur > classify.otu(list=current, count=current, taxonomy=current, label=0.03)
mothur > count.groups(shared=current)
mothur > sub.sample(shared=current, size=1200)
```

## Supplemental File 1B Sampling Scheme

| <b>Analysis</b>         | <b>Sample type</b> |
|-------------------------|--------------------|
| Metacommunity Diagnosis | Individual Samples |
| Indicator Analysis      | Individual Samples |
| Fungal Load             | Site Average       |
| Distance-Decay          | Site Average       |
| Environmental Variables | Individual Samples |

## Supplemental File 1C R code

```
library(vegan)
library(metacom)
library(betapart)
library(rcompanion)
library(geosphere)
library(nortest)
library(ggplot2)
library(reshape)
library(car)
library(tidyverse)
library(dplyr)
library(nlme)
library(lme4)
library(Hmisc)
library(indicspecies)

stability<-read.table(file= "stability", header=TRUE)
metadata<-read.csv(file="PESU_site_5.csv")
data<-merge(metadata,stability, by="Group")
rownames(data)<-data$Group
set.seed(1138)
#####
#EMS analysis
#####
####DataPrep####
##Positive
###
positive<-subset(data, pd=="1")
posmeta<-positive[1:23]
pos_otus<-positive[24:23869]
#Remove zeros
colSums(pos_otus)
i<-(colSums(pos_otus, na.rm=T)!=0)
posotusnonzero<-pos_otus[,i]
posotuzeros<-pos_otus[:,!i]
colSums(posotuzeros)
posoturemovezero<-posotusnonzero
#Remove 1s
colSums(posoturemovezero)
i<-(colSums(posoturemovezero, na.rm=T)!=1)
posotusnonzero<-posoturemovezero[,i]
posotuzeros<-posoturemovezero[:,!i]
colSums(posotuzeros)
posoturemovezero<-posotusnonzero
```

```

colSums(posoturemovezero)
PA_pos<-decoStand(x=posoturemovezero, method="pa")
#####Metacom#####
metacom_pos_1<-(Metacomcommunity(PA_pos, scores = 1, method = "r1",
turnoverMethod = "EMS", sims = 99, order = TRUE,
allowEmpty = TRUE, binary = TRUE, verbose = TRUE, seed = 1))

Imagine(comm=PA_pos, col=c(0,1), order=TRUE, scores=1, fill=TRUE, xlab="", ylab="", yline=2, xline=2,
sitenames=rownames(PA_pos), speciesnames=colnames(posoturemovezero), binary=TRUE)
#####end#####
###
##Negative
###
negative<-subset(data, pd=="0")
neg_otus<-negative[24:23869]
negmeta<-negative[1:24]
colSums(neg_otus)
i<-(colSums(neg_otus, na.rm=T)!=0)
negotusnonzero<-neg_otus[,i]
negotuzeros<-neg_otus[!,i]
colSums(negotuzeros)
negoturemovezero<-negotusnonzero
#Remove 1s
colSums(negoturemovezero)
i<-(colSums(negoturemovezero, na.rm=T)!=1)
negotusnonzero<-negoturemovezero[,i]
negotuzeros<-negoturemovezero[!,i]
colSums(negotuzeros)
negoturemovezero<-negotusnonzero

PA_neg<-decoStand(x=negoturemovezero, method="pa")
#####Metacom#####
metacom_neg<-(Metacomcommunity(PA_neg, scores = 1, method = "r1",
turnoverMethod = "EMS", sims = 1000, order = TRUE,
allowEmpty = TRUE, binary = TRUE, verbose = TRUE, seed = 1))

Imagine(comm=PA_neg, col=c(0,1), order=TRUE, scores=1, fill=TRUE, xlab="", ylab="", yline=2, xline=2,
sitenames=rownames(PA_neg), speciesnames=colnames(negoturemovezero), binary=TRUE)
#####end#####
#####end#####
#####
#Indicator analysis
#####
#PESU + vs PESU -
#####Indicator#####
indicator1<-subset(data, sp=="PESU")
meta<-indicator1[1:23]

```

```

indicator1_otus<-indicator1[24:23871]
colSums(indicator1_otus)
i<-(colSums(indicator1_otus, na.rm=T)!=0)
indicator1otusnonzero<-indicator1_otus[,i]
indicator1otuzeros<-indicator1_otus[:,!i]
colSums(indicator1otuzeros)
indicator1oturemovezero<-indicator1otusnonzero
indicator1test<-multipatt(indicator1oturemovezero, indicator1$pd, func="IndVal.g",
control=how(nperm=999))
options(max.print = 10000)
summary(indicator1test)

```

```

indicator1<-select(data, "Group", "site", "copies",
"pd","text","Otu000193","Otu000201","Otu000728","Otu000342","Otu000298","Otu000290","Otu0002
51","Otu000310","Otu000266","Otu000455","Otu001016","Otu001058","Otu000362","Otu001460","Ot
u000604","Otu000374","Otu000453","Otu002066","Otu001333","Otu002979","Otu002334","Otu00147
3","Otu001616","Otu001376","Otu000836","Otu000730","Otu000524","Otu002926","Otu001091","Otu
002137","Otu001568","Otu001338","Otu001102","Otu001965","Otu002231","Otu001449","Otu001551
","Otu001304","Otu001894","Otu002378","Otu000722","Otu004822","Otu001012","Otu002086","Otu0
02685","Otu000613","Otu006285","Otu000820","Otu003320","Otu005831","Otu001040","Otu001640",
"Otu001934","Otu006773","Otu001759","Otu000785","Otu002088","Otu000823","Otu001527","Otu00
3764","Otu001355","Otu001876","Otu003886","Otu002069","Otu008301","Otu002270","Otu024140","
Otu002122","Otu001644","Otu001878","Otu003334","Otu003827","Otu004693","Otu001590","Otu003
178","Otu006940","Otu001186","Otu002874","Otu002278","Otu004546","Otu002244","Otu007867","O
tu002110","Otu003053","Otu006512","Otu002862","Otu001097","Otu000941","Otu001235","Otu0022
54","Otu002074","Otu003678","Otu000817","Otu003610","Otu006579","Otu001936","Otu002934","Ot
u001078","Otu006625","Otu001669","Otu002286","Otu002551","Otu002927","Otu004983","Otu00563
5","Otu005735","Otu006585","Otu008100","Otu008375","Otu011970","Otu012267","Otu012378","Otu
012487","Otu012796","Otu013386","Otu013497","Otu026010","Otu001345","Otu005377","Otu004051
","Otu003846","Otu003530","Otu005240","Otu005178","Otu002191","Otu002936","Otu003738","Otu0
03731","Otu004537","Otu011269","Otu004690","Otu003477","Otu006098","Otu007219","Otu013061",
"Otu006380","Otu003210","Otu006586","Otu006835","Otu002892","Otu007438","Otu007537","Otu00
7877","Otu008994","Otu015437","Otu021286","Otu030657","Otu002202","Otu002656","Otu001007",
"Otu003104","Otu012840","Otu004713","Otu004699","Otu003116","Otu000606","Otu003683","Otu003
020","Otu007440","Otu004061","Otu004100","Otu005432","Otu011986","Otu001507","Otu001781","O
tu004004","Otu005354","Otu005434","Otu012302","Otu001301","Otu002336","Otu004336","Otu0025
54","Otu003538","Otu013536","Otu008454","Otu003074","Otu002185","Otu002813","Otu004334","Ot
u006508","Otu008303","Otu002233","Otu004768","Otu003654","Otu004531","Otu001150","Otu00243
4","Otu002978","Otu003134","Otu003151","Otu003450","Otu003455","Otu003818","Otu003916","Otu
004083","Otu004163","Otu004211","Otu004234","Otu004251","Otu004261","Otu004302","Otu004335
","Otu004374","Otu004406","Otu004631","Otu004702","Otu005013","Otu005374","Otu005446","Otu0
05547","Otu005603","Otu006051","Otu006078","Otu006145","Otu006745","Otu006826","Otu006862",
"Otu006987","Otu007047","Otu007120","Otu007300","Otu007324","Otu007472","Otu007510","Otu00
7528","Otu007547","Otu007763","Otu007766","Otu007767","Otu007778","Otu008285","Otu008302",
"Otu008525","Otu008584","Otu008611","Otu008668","Otu008880","Otu008953","Otu008984","Otu009
022","Otu009317","Otu009641","Otu009689","Otu009713","Otu009753","Otu009862","Otu009908","O
tu010061","Otu010332","Otu010718","Otu011401","Otu011409","Otu011662","Otu011795","Otu0119
92","Otu012118","Otu012171","Otu012494","Otu012496","Otu012677","Otu013395","Otu013581","Ot

```

```

u013618","Otu013688","Otu013963","Otu014325","Otu014464","Otu014507","Otu014905","Otu01496
4","Otu015954","Otu016384","Otu016751","Otu016858","Otu016879","Otu017179","Otu017462","Otu
018197","Otu018633","Otu019079","Otu019205","Otu019713","Otu019890","Otu020007","Otu020311
","Otu020381","Otu020439","Otu020522","Otu020537","Otu021171","Otu021727","Otu021934","Otu0
22008","Otu023417","Otu023420","Otu023681","Otu025394","Otu025430","Otu025699","Otu025721",
"Otu027655","Otu028075","Otu028228","Otu030143","Otu030720","Otu031864","Otu033370","Otu03
3768","Otu003245","Otu002766","Otu002886","Otu002414","Otu002678","Otu001492","Otu003031",
"Otu003728","Otu003029","Otu002426","Otu004166","Otu000428","Otu005664","Otu001390","Otu003
325","Otu009979","Otu004737","Otu008979","Otu004329","Otu006638","Otu011384","Otu002792","O
tu005727","Otu007451","Otu004043","Otu009296","Otu005994","Otu007538","Otu020898","Otu0027
23","Otu003894","Otu006240","Otu001493","Otu013985","Otu018786","Otu003727","Otu006632","Ot
u003408","Otu002479","Otu007571","Otu010106","Otu010185","Otu010472","Otu003964","Otu00516
9","Otu014317","Otu002265","Otu004962","Otu009234","Otu003635","Otu006280",
"Otu003550","Otu005750","Otu016062")

```

```

indicatorsite<-indicator1$site
test<-colSums(indicator1[6:368])
summary(test)

```

```

indicatorpd<-indicator1$pd
indicatorsite<-indicator1$site
rowSums(indicator1[6:368])
indicatorabund<-rowSums(indicator1[6:368])
boxplot(indicatorabund~indicatorpd)

```

```

plotNormalHistogram(indicatorabund[indicatorpd=="1"])
plotNormalHistogram(indicatorabund[indicatorpd=="0"])
logabund<-log(indicatorabund+1)
plotNormalHistogram(logabund[indicatorpd=="1"])
plotNormalHistogram(logabund[indicatorpd=="0"])
shapiro.test(logabund[indicatorpd=="1"])
shapiro.test(logabund[indicatorpd=="0"])
bartlett.test(indicatorabund~indicatorpd)
#GLMM compairason of indicator abunadnce between +/- bats
m1<-glmer(indicatorabund~indicatorpd+(1|indicatorsite), family=poisson)
op<-par(mfrow=c(1,2))
qqnorm(resid(m1))
qqline(resid(m1))
plot(residuals(m1)~fitted(m1), main="residuals vs fitted")
op<-par(mfrow=c(1,1))
summary(m1)
m2<-glmer.nb(indicatorabund~indicatorpd+(1|indicatorsite), data=indicator1, nAGQ = 25,
control=glmerControl(optimizer="bobyqa"))#Produces singular fit

```

```

boxplot(indicatorabund~indicatorpd, data=indicator1, xlab = "Pd status", ylab = "Pd (-) Indicator Taxa
Abundance")
stripchart(indicatorabund~indicatorpd, data=indicator1,vertical=TRUE, method="jitter", add=TRUE,
pch=20, col="black")
indicatorsite<-indicator1$site

```



```
p<-ggplot(indicator1, aes(x=indicatortext, y=indicatorabund, group=text))+
  geom_boxplot()+
  labs(x="P. destructans Status", y="P. destructans (-) Indicator Taxa Abundance", caption = "A" )+
  theme( plot.caption = element_text(size=28, face="bold"),
        #panel.border = element_blank(),
        #panel.grid.major = element_blank(),
        #panel.grid.minor=element_blank(),
        panel.background = element_blank(),
        axis.line=element_line(size=0.5, colour="black"))
```

p

```
#Copy # analysis
```

```
indicatorcopiesneg<-subset(indicator1, pd=="1", header=T)
logcopiesindicatorneg<-log(indicatorcopiesneg$copies+1)
indicatorcopiesnegabund<-rowSums(indicatorcopiesneg[6:368])
indicatorcopiesnegsite<-indicatorcopiesneg$site
plot(logcopiesindicatorneg, indicatorcopiesnegabund)
```

```
m4<-glmer(indicatorcopiesnegabund~logcopiesindicatorneg+(1|indicatorcopiesnegsite), family =
  poisson)
op<-par(mfrow=c(1,2))
qqnorm(resid(m4))
qqline(resid(m4))
plot(residuals(m4)~fitted(m4), main="residuals vs fitted")
op<-par(mfrow=c(1,1))
summary(m4)
```

```
m4nb<-glmer.nb(indicatorcopiesnegabund~logcopiesindicatorneg+(1|indicatorcopiesnegsite),
  data=indicator1)
#Singular fit
```

```
indicatorcopiesnegdata<-indicatorcopiesneg[6:368]
B1 <- glm(indicatorcopiesnegabund~logcopiesindicatorneg, family=poisson,
  data=indicatorcopiesnegdata)
summary(B1)
plot(indicatorcopiesnegabund~logcopiesindicatorneg, data=indicatorcopiesnegdata, type='n', bty="n",
  xlim=c(0,10), ylim=c(0,275),xlab="(Log) Fungal Load", ylab="Indicator Abundance")
points(logcopiesindicatorneg, indicatorcopiesnegabund, pch=19, cex=1.5, col="black", bg="black")
axis(side=1, lwd=2)
axis(side=2, lwd=2)
title("B", adj=1, line=-26, cex.main=2)
pred <-seq (0,10.4,0.01)
B1.pred <- predict(B1, list(logcopiesindicatorneg=pred), type="response", data=indicatorcopiesnegdata)
lines(pred, B1.pred, lty=1, col="blue", lwd=5)
```

```

####end####
#####
#Distance Decay
#####
####DDR####
##
#Positive
##
betapart.core_pos<-betapart.core(PA_pos)
pair_pos<-beta.pair(betapart.core_pos, index.family="sorensen")

SOR_pos<-(pair_pos$beta.sor)
SIM_pos<-(pair_pos$beta.sim)
SNE_pos<-(pair_pos$beta.sne)

logSOR_pos<-log(SOR_pos+1)
logSIM_pos<-log(SIM_pos+1)
logSNE_pos<-log(SNE_pos+1)

geo_pos = data.frame(positive$Longitude, positive$Latitude)
posdist<-dist(geo_pos, method="euclidean")
logposdist<-log(posdist+1)

plot(posdist, SOR_pos)
plot(logposdist, SOR_pos)

#Make dataframe for modeling approach - need data in columns
#posdf<-as.matrix(SIM_pos)
#posdf[upper.tri(posdf)] <- NA
#SIM_posmelt<-melt(posdf)
#write.csv(SIM_posmelt, file="200612_SIM_posmelt.csv")#Make sure to relabel columns-relabel so that
#the first column is 'g'
#posdfSOR<-as.matrix(SOR_pos)
#posdfSOR[upper.tri(posdfSOR)] <- NA
#SOR_posmelt<-melt(posdfSOR)
#write.csv(SOR_posmelt, file="200612_SOR_posmelt.csv")
#posdfSNE<-as.matrix(SNE_pos)
#posdfSNE[upper.tri(posdfSNE)] <- NA
#SNE_posmelt<-melt(posdfSNE)
#write.csv(SNE_posmelt, file="200612_SNE_posmelt.csv")

#posdistdf<-as.matrix(posdist)
#posdistdf[upper.tri(posdistdf)] <- NA
#rownames(posdistdf)<-positive$Group
#colnames(posdistdf)<-positive$Group
#posdistmelt<-melt(posdistdf)
#write.csv(posdistmelt, file="200713_posdistmelttest.csv")
#GeoPos<-read.csv("200612_posdistmelt.csv")

```

```

#SIMPos<-read.csv("200612_SIM_posmelt.csv")
#SORPos<-read.csv("200612_SOR_posmelt.csv")
#SNEPos<-read.csv("200612_SNE_posmelt.csv")
#posSIM_Geo<-merge(GeoPos,SIMPos, by="g")
#posSOR_Geo<-merge(SORPos, SNEPos, by="g")
#totalpos<-merge(posSIM_Geo, posSOR_Geo, by="g")
#write.csv(totalpos, file="200612_totalgeodist.csv")

##
#Negative
##
betapart.core_neg<-betapart.core(PA_neg)
pair_neg<-beta.pair(betapart.core_neg, index.family="sor")
SOR_neg<-(pair_neg$beta.sor)
SIM_neg<-(pair_neg$beta.sim)
SNE_neg<-(pair_neg$beta.sne)

logSOR_neg<-log(SOR_neg+1)
logSIM_neg<-log(SIM_neg+1)
logSNE_neg<-log(SNE_neg+1)

geo_neg = data.frame(negative$Longitude, negative$Latitude)
rownames(geo_neg)<-negative$Group
negdist<-dist(geo_neg, method="euclidean") #1 ~ 100km
lognegdist<-log(negdist+1)

#SIM_negdf<-as.matrix(SIM_neg)
#SIM_negdf[upper.tri(SIM_negdf)] <- NA
#SIM_negmelt<-melt(SIM_negdf)
#write.csv(SIM_negmelt, file="200612_SIM_negmelt.csv")#Make sure to relabel columns-relabel so that
#the first column is g
#SOR_negdf<-as.matrix(SOR_neg)
#SOR_negdf[upper.tri(SOR_negdf)] <- NA
#SOR_negmelt<-melt(SOR_negdf)
#write.csv(SOR_negmelt, file="200612_SOR_negmelt.csv")
#SNE_negdf<-as.matrix(SNE_neg)
#SNE_negdf[upper.tri(SNE_negdf)] <- NA
#SNE_negmelt<-melt(SNE_negdf)
#write.csv(SNE_negmelt, file="200612_SNE_negmelt.csv")
#negdistdf<-as.matrix(negdist)
#negdistdf[upper.tri(negdistdf)] <- NA
#negdistmelt<-melt(negdistdf)
#rownames(negdistdf)<-negative$Group
#colnames(negdistdf)<-negative$Group
#write.csv(negdistmelt, file="200612_Negdistmelt.csv")

#GeoNeg<-read.csv("200612_Negdistmelt.csv")
#SIMneg<-read.csv("200612_SIM_negmelt.csv")

```

```

#SORneg<-read.csv("200612_SOR_negmelt.csv")
#SNEneg<-read.csv("200612_SNE_negmelt.csv")

#negSIM_Geo<-merge(GeoNeg,SIMneg, by="g")
#negSOR_Geo<-merge(SORneg,SNEneg, by="g")
#totalneg<-merge(negSIM_Geo, negSOR_Geo, by="g")
#write.csv(totalneg, file="200612_totalneg_geodist.csv")

#df <- read.csv("200612_Sim_bygeo.csv", header = TRUE, row.names = NULL)

#dist.unique<-unique(df$GeoDist2)
#write.csv(dist.unique, file = "test2.csv")
####Site contrasts####
df %>%
mutate(contrastID = case_when(
  GeoDist==0~"1",
  GeoDist==1.271903372~"2",
  GeoDist==0.85368171~"3",
  GeoDist==0.740304456~"4",
  GeoDist==1.153182792~"5",
  GeoDist==1.313440762~"6",
  GeoDist==0.407680362~"7",
  GeoDist==2.431202204~"8",
  GeoDist==0.505322856~"9",
  GeoDist==1.284026106~"10",
  GeoDist==1.465905806~"11",
  GeoDist==1.425243087~"12",
  GeoDist==0.877550124~"13",
  GeoDist==1.236631568~"14",
  GeoDist==1.029505762~"15",
  GeoDist==1.002261517~"16",
  GeoDist==1.010503693~"17",
  GeoDist==0.964223147~"18",
  GeoDist==1.398601493~"19",
  GeoDist==0.9145334~"20",
  GeoDist==1.110908381~"21",
  GeoDist==1.59397345~"22",
  GeoDist==1.700349417~"23",
  GeoDist==0.341663772~"24",
  GeoDist==0.459780738~"25",
  GeoDist==0.976872935~"26",
  GeoDist==1.16087469~"27",
  GeoDist==1.889791076~"28",
  GeoDist==1.563729516~"29",
  GeoDist==0.377409325~"30",
  GeoDist==0.166063942~"31",
  GeoDist==1.14069024~"32",
  GeoDist==0.401233338~"33",

```

GeoDist==0.469186449~"34",  
GeoDist==0.336467093~"35",  
GeoDist==0.51999389~"36",  
GeoDist==1.135025435~"37",  
GeoDist==1.134794724~"38",  
GeoDist==0.482234183~"39",  
GeoDist==0.51555363~"40",  
GeoDist==0.766645657~"41",  
GeoDist==1.233017438~"42",  
GeoDist==2.216942632~"43",  
GeoDist==1.031671489~"44",  
GeoDist==0.541554476~"45",  
GeoDist==1.251644424~"46",  
GeoDist==0.728677246~"47",  
GeoDist==1.247097729~"48",  
GeoDist==3.57170676~"49",  
GeoDist==1.776716236~"50",  
GeoDist==0.786130753~"51",  
GeoDist==2.438924313~"52",  
GeoDist==2.640902005~"53",  
GeoDist==1.616218665~"54",  
GeoDist==2.357506619~"55",  
GeoDist==0.745910787~"56",  
GeoDist==0.786406682~"57",  
GeoDist==0.776060382~"58",  
GeoDist==0.809592161~"59",  
GeoDist==2.612321942~"60",  
GeoDist==1.828934569~"61",  
GeoDist==2.182943807~"62",  
GeoDist==2.817564725~"63",  
GeoDist==2.850846701~"64",  
GeoDist==1.319866302~"65",  
GeoDist==0.812270325~"66",  
GeoDist==0.476932273~"67",  
GeoDist==1.161776894~"68",  
GeoDist==3.079460617~"69",  
GeoDist==2.787954104~"70",  
GeoDist==1.397579778~"71",  
GeoDist==1.382913362~"72",  
GeoDist==0.755686683~"73",  
GeoDist==0.984849232~"74",  
GeoDist==1.74107356~"75",  
GeoDist==1.325191915~"76",  
GeoDist==0.751950205~"77",  
GeoDist==1.170443216~"78",  
GeoDist==1.169817308~"79",  
GeoDist==1.269541037~"80",  
GeoDist==0.996404482~"81",

GeoDist==1.120920451~"82",  
GeoDist==0.308193063~"83",  
GeoDist==0.945320786~"84",  
GeoDist==0.802054431~"85",  
GeoDist==1.706852972~"86",  
GeoDist==1.522216348~"87",  
GeoDist==1.162886638~"88",  
GeoDist==3.240492136~"89",  
GeoDist==1.236838722~"90",  
GeoDist==1.537375075~"91",  
GeoDist==2.319575727~"92",  
GeoDist==2.20463378~"93",  
GeoDist==1.6706015~"94",  
GeoDist==2.075592877~"95",  
GeoDist==1.334174213~"96",  
GeoDist==1.339083638~"97",  
GeoDist==1.338823605~"98",  
GeoDist==1.324493267~"99",  
GeoDist==2.1809561~"100",  
GeoDist==1.755662278~"101",  
GeoDist==1.961552143~"102",  
GeoDist==2.358408059~"103",  
GeoDist==2.517460799~"104",  
GeoDist==1.148609515~"105",  
GeoDist==0.6811341~"106",  
GeoDist==1.095467305~"107",  
GeoDist==1.665888573~"108",  
GeoDist==2.678154814~"109",  
GeoDist==2.3284851~"110",  
GeoDist==1.20712953~"111",  
GeoDist==1.019550261~"112",  
GeoDist==1.422396584~"113",  
GeoDist==0.952102163~"114",  
GeoDist==1.189772992~"115",  
GeoDist==0.623306924~"116",  
GeoDist==0.684182945~"117",  
GeoDist==1.653082016~"118",  
GeoDist==1.652600224~"119",  
GeoDist==0.463631356~"120",  
GeoDist==0.346626222~"121",  
GeoDist==0.132370109~"122",  
GeoDist==1.20618611~"123",  
GeoDist==1.834944586~"124",  
GeoDist==0.958348196~"125",  
GeoDist==0.730815489~"126",  
GeoDist==0.720608595~"127",  
GeoDist==3.046361466~"128",  
GeoDist==1.241800742~"129",

GeoDist==0.738676899~"130",  
GeoDist==1.942257592~"131",  
GeoDist==2.101053879~"132",  
GeoDist==1.144756753~"133",  
GeoDist==1.82960507~"134",  
GeoDist==0.534038062~"135",  
GeoDist==0.543398537~"136",  
GeoDist==0.541670302~"137",  
GeoDist==0.534923562~"138",  
GeoDist==2.072612284~"139",  
GeoDist==1.329273545~"140",  
GeoDist==1.661557752~"141",  
GeoDist==2.277223305~"142",  
GeoDist==2.320914402~"143",  
GeoDist==0.784450002~"144",  
GeoDist==0.290105293~"145",  
GeoDist==0.307332707~"146",  
GeoDist==0.898667097~"147",  
GeoDist==2.543755234~"148",  
GeoDist==2.247526549~"149",  
GeoDist==0.862549846~"150",  
GeoDist==0.8425968~"151",  
GeoDist==0.620369135~"152",  
GeoDist==0.449898611~"153",  
GeoDist==1.208144917~"154",  
GeoDist==0.853700246~"155",  
GeoDist==0.231793249~"156",  
GeoDist==0.892175891~"157",  
GeoDist==0.891621576~"158",  
GeoDist==0.846780341~"159",  
GeoDist==0.598288301~"160",  
GeoDist==0.831887407~"161",  
GeoDist==0.510064177~"162",  
GeoDist==1.484650426~"163",  
GeoDist==0.641326688~"164",  
GeoDist==0.767652536~"165",  
GeoDist==2.613450267~"166",  
GeoDist==1.441690879~"167",  
GeoDist==0.564785632~"168",  
GeoDist==1.410984598~"169",  
GeoDist==1.903913356~"170",  
GeoDist==0.647344754~"171",  
GeoDist==1.507189912~"172",  
GeoDist==0.505765528~"173",  
GeoDist==0.467055337~"174",  
GeoDist==0.476557953~"175",  
GeoDist==0.451015762~"176",  
GeoDist==1.875125575~"177",

GeoDist==0.90961362~"178",  
GeoDist==1.310379212~"179",  
GeoDist==2.076238959~"180",  
GeoDist==1.967177528~"181",  
GeoDist==0.868677022~"182",  
GeoDist==1.030086378~"183",  
GeoDist==0.79036764~"184",  
GeoDist==0.10295182~"185",  
GeoDist==2.237203174~"186",  
GeoDist==2.05183139~"187",  
GeoDist==0.895763989~"188",  
GeoDist==1.099843883~"189",  
GeoDist==0.514740437~"190",  
GeoDist==0.80474225~"191",  
GeoDist==1.438282294~"192",  
GeoDist==1.462239289~"193",  
GeoDist==1.022670193~"194",  
GeoDist==0.083028479~"195",  
GeoDist==0.083643073~"196",  
GeoDist==1.556627321~"197",  
GeoDist==1.409057727~"198",  
GeoDist==1.695681726~"199",  
GeoDist==0.971278002~"200",  
GeoDist==1.974802208~"201",  
GeoDist==1.062264256~"202",  
GeoDist==3.215234048~"203",  
GeoDist==1.74871363~"204",  
GeoDist==0.076814033~"205",  
GeoDist==2.020748402~"206",  
GeoDist==2.416751496~"207",  
GeoDist==1.204750267~"208",  
GeoDist==2.054876971~"209",  
GeoDist==0.291333197~"210",  
GeoDist==0.330083722~"211",  
GeoDist==0.31860752~"212",  
GeoDist==0.374081583~"213",  
GeoDist==2.387310202~"214",  
GeoDist==1.461894232~"215",  
GeoDist==1.860707935~"216",  
GeoDist==2.594822404~"217",  
GeoDist==2.537570467~"218",  
GeoDist==1.16778086~"219",  
GeoDist==0.966164021~"220",  
GeoDist==0.427187547~"221",  
GeoDist==0.538478673~"222",  
GeoDist==2.796938409~"223",  
GeoDist==2.56781213~"224",  
GeoDist==1.229152336~"225",



GeoDist==1.34251454~"226",  
GeoDist==0.186563122~"227",  
GeoDist==0.914313194~"228",  
GeoDist==1.728862072~"229",  
GeoDist==1.528854222~"230",  
GeoDist==0.923624561~"231",  
GeoDist==0.561137447~"232",  
GeoDist==0.560580317~"233",  
GeoDist==1.556111351~"234",  
GeoDist==1.324273485~"235",  
GeoDist==1.561515228~"236",  
GeoDist==0.420564816~"237",  
GeoDist==1.33509152~"238",  
GeoDist==2.326772881~"239",  
GeoDist==0.700678169~"240",  
GeoDist==1.014923773~"241",  
GeoDist==1.234437778~"242",  
GeoDist==1.40745183~"243",  
GeoDist==0.507720679~"244",  
GeoDist==1.110895216~"245",  
GeoDist==0.772005426~"246",  
GeoDist==0.732303045~"247",  
GeoDist==0.743657836~"248",  
GeoDist==0.688620099~"249",  
GeoDist==1.378322912~"250",  
GeoDist==0.627431088~"251",  
GeoDist==0.940952619~"252",  
GeoDist==1.586060483~"253",  
GeoDist==1.603826619~"254",  
GeoDist==0.10845097~"255",  
GeoDist==0.549868749~"256",  
GeoDist==0.835049024~"257",  
GeoDist==0.791730694~"258",  
GeoDist==1.834483096~"259",  
GeoDist==1.557179655~"260",  
GeoDist==0.168130201~"261",  
GeoDist==0.332193305~"262",  
GeoDist==0.876551794~"263",  
GeoDist==0.274564945~"264",  
GeoDist==0.688716043~"265",  
GeoDist==0.740720122~"266",  
GeoDist==0.589139644~"267",  
GeoDist==0.762619727~"268",  
GeoDist==0.762496136~"269",  
GeoDist==0.870681213~"270",  
GeoDist==0.818525548~"271",  
GeoDist==1.10431629~"272",  
GeoDist==1.110782182~"273",

GeoDist==2.16949064~"274",  
GeoDist==2.005506117~"275",  
GeoDist==3.144499556~"276",  
GeoDist==1.202767834~"277",  
GeoDist==1.045719284~"278",  
GeoDist==2.012695867~"279",  
GeoDist==1.216987717~"280",  
GeoDist==2.971650227~"281",  
GeoDist==2.923054939~"282",  
GeoDist==2.936304999~"283",  
GeoDist==2.881759218~"284",  
GeoDist==1.066452383~"285",  
GeoDist==1.764513579~"286",  
GeoDist==1.389153923~"287",  
GeoDist==0.919394814~"288",  
GeoDist==0.73161459~"289",  
GeoDist==2.264510024~"290",  
GeoDist==2.834788898~"291",  
GeoDist==3.13260012~"292",  
GeoDist==2.710319427~"293",  
GeoDist==0.580020515~"294",  
GeoDist==0.946240645~"295",  
GeoDist==2.186579536~"296",  
GeoDist==2.274324111~"297",  
GeoDist==3.043910811~"298",  
GeoDist==2.596768695~"299",  
GeoDist==2.052823403~"300",  
GeoDist==2.618519807~"301",  
GeoDist==2.886459929~"302",  
GeoDist==2.680594995~"303",  
GeoDist==2.681025627~"304",  
GeoDist==2.785176254~"305",  
GeoDist==2.932342473~"306",  
GeoDist==3.125923628~"307",  
GeoDist==3.401897272~"308",  
GeoDist==4.474073447~"309",  
GeoDist==1.707189656~"310",  
GeoDist==1.21444534~"311",  
GeoDist==0.967952012~"312",  
GeoDist==0.943187679~"313",  
GeoDist==0.886296062~"314",  
GeoDist==1.457536879~"315",  
GeoDist==1.421838839~"316",  
GeoDist==1.43226328~"317",  
GeoDist==1.379417315~"318",  
GeoDist==0.944126772~"319",  
GeoDist==0.832435325~"320",  
GeoDist==0.828551446~"321",

GeoDist==1.124914596~"322",  
GeoDist==1.288800999~"323",  
GeoDist==0.592241945~"324",  
GeoDist==0.964973662~"325",  
GeoDist==1.456857493~"326",  
GeoDist==1.480483854~"327",  
GeoDist==1.441347134~"328",  
GeoDist==1.094782485~"329",  
GeoDist==0.54896562~"330",  
GeoDist==0.412364965~"331",  
GeoDist==1.56589945~"332",  
GeoDist==0.850934089~"333",  
GeoDist==0.047350803~"334",  
GeoDist==0.613688084~"335",  
GeoDist==1.025074427~"336",  
GeoDist==1.449652682~"337",  
GeoDist==1.449610188~"338",  
GeoDist==0.779693468~"339",  
GeoDist==0.945952473~"340",  
GeoDist==1.120508855~"341",  
GeoDist==1.722485878~"342",  
GeoDist==2.721946553~"343",  
GeoDist==1.948514933~"344",  
GeoDist==2.355523942~"345",  
GeoDist==1.135855916~"346",  
GeoDist==1.989332733~"347",  
GeoDist==0.254525895~"348",  
GeoDist==0.285642571~"349",  
GeoDist==0.27579855~"350",  
GeoDist==0.327775936~"351",  
GeoDist==2.326106897~"352",  
GeoDist==1.394486318~"353",  
GeoDist==1.794530505~"354",  
GeoDist==2.533219087~"355",  
GeoDist==2.470149569~"356",  
GeoDist==1.121676207~"357",  
GeoDist==0.957560105~"358",  
GeoDist==0.444136563~"359",  
GeoDist==0.461891976~"360",  
GeoDist==2.730936406~"361",  
GeoDist==2.506460142~"362",  
GeoDist==1.180478642~"363",  
GeoDist==1.304459841~"364",  
GeoDist==0.143379302~"365",  
GeoDist==0.883069683~"366",  
GeoDist==1.688981804~"367",  
GeoDist==1.512626554~"368",  
GeoDist==0.918648007~"369",

GeoDist==0.484911034~"370",  
GeoDist==0.484359203~"371",  
GeoDist==1.548211865~"372",  
GeoDist==1.324444343~"373",  
GeoDist==1.570433067~"374",  
GeoDist==0.478570777~"375",  
GeoDist==1.411903641~"376",  
GeoDist==0.766581449~"377",  
GeoDist==0.83172713~"378",  
GeoDist==0.404574939~"379",  
GeoDist==1.789869703~"380",  
GeoDist==1.741043977~"381",  
GeoDist==1.754234876~"382",  
GeoDist==1.701610184~"383",  
GeoDist==0.74904653~"384",  
GeoDist==0.613055534~"385",  
GeoDist==0.385987091~"386",  
GeoDist==0.877308772~"387",  
GeoDist==0.620589047~"388",  
GeoDist==1.203405273~"389",  
GeoDist==1.780711337~"390",  
GeoDist==1.978488037~"391",  
GeoDist==1.508496537~"392",  
GeoDist==0.896976154~"393",  
GeoDist==0.866433455~"394",  
GeoDist==1.132309716~"395",  
GeoDist==1.300174716~"396",  
GeoDist==1.854591491~"397",  
GeoDist==1.50776415~"398",  
GeoDist==1.255034209~"399",  
GeoDist==1.74492339~"400",  
GeoDist==1.822934487~"401",  
GeoDist==1.47915676~"402",  
GeoDist==1.47960015~"403",  
GeoDist==1.914935889~"404",  
GeoDist==1.978638224~"405",  
GeoDist==2.229122204~"406",  
GeoDist==2.238492708~"407",  
GeoDist==3.307348869~"408",  
GeoDist==1.256658636~"409",  
GeoDist==0.424894247~"410",  
GeoDist==2.141400392~"411",  
GeoDist==2.095586338~"412",  
GeoDist==2.108384487~"413",  
GeoDist==2.051503555~"414",  
GeoDist==0.029456655~"415",  
GeoDist==0.996258452~"416",  
GeoDist==0.608595845~"417",

GeoDist==0.179027712~"418",  
GeoDist==0.38151491~"419",  
GeoDist==1.323716454~"420",  
GeoDist==1.858793307~"421",  
GeoDist==2.242221867~"422",  
GeoDist==1.983880462~"423",  
GeoDist==0.473699992~"424",  
GeoDist==0.151149783~"425",  
GeoDist==1.247173828~"426",  
GeoDist==1.279934336~"427",  
GeoDist==2.23253424~"428",  
GeoDist==1.656981983~"429",  
GeoDist==1.014911736~"430",  
GeoDist==1.581338684~"431",  
GeoDist==1.914894603~"432",  
GeoDist==1.951094644~"433",  
GeoDist==1.951355315~"434",  
GeoDist==1.745365968~"435",  
GeoDist==1.908492334~"436",  
GeoDist==2.086893339~"437",  
GeoDist==2.517913643~"438",  
GeoDist==3.574387635~"439",  
GeoDist==0.863139413~"440",  
GeoDist==0.960605794~"441",  
GeoDist==0.911839658~"442",  
GeoDist==0.925077407~"443",  
GeoDist==0.871493558~"444",  
GeoDist==1.227921213~"445",  
GeoDist==0.263555892~"446",  
GeoDist==0.666310432~"447",  
GeoDist==1.42894965~"448",  
GeoDist==1.335529661~"449",  
GeoDist==0.538244543~"450",  
GeoDist==1.038667487~"451",  
GeoDist==1.149621026~"452",  
GeoDist==0.730006118~"453",  
GeoDist==1.600018309~"454",  
GeoDist==1.404488882~"455",  
GeoDist==0.503557709~"456",  
GeoDist==0.744653478~"457",  
GeoDist==1.031291581~"458",  
GeoDist==0.748193035~"459",  
GeoDist==0.956798081~"460",  
GeoDist==1.211960316~"461",  
GeoDist==1.068145305~"462",  
GeoDist==0.69760636~"463",  
GeoDist==0.697909901~"464",  
GeoDist==1.358378774~"465",

GeoDist==1.326056323~"466",  
GeoDist==1.610330888~"467",  
GeoDist==1.407018832~"468",  
GeoDist==2.475698895~"469",  
GeoDist==1.791783621~"470",  
GeoDist==1.74423104~"471",  
GeoDist==1.757356682~"472",  
GeoDist==1.701140174~"473",  
GeoDist==0.399847805~"474",  
GeoDist==0.599633475~"475",  
GeoDist==0.196917975~"476",  
GeoDist==0.580697864~"477",  
GeoDist==0.494133804~"478",  
GeoDist==1.047633173~"479",  
GeoDist==1.620730737~"480",  
GeoDist==1.927741539~"481",  
GeoDist==1.592759535~"482",  
GeoDist==0.742359849~"483",  
GeoDist==0.560010745~"484",  
GeoDist==0.969777832~"485",  
GeoDist==1.073963045~"486",  
GeoDist==1.874808405~"487",  
GeoDist==1.37987817~"488",  
GeoDist==0.931328583~"489",  
GeoDist==1.469029108~"490",  
GeoDist==1.671281825~"491",  
GeoDist==1.56050811~"492",  
GeoDist==1.560822104~"493",  
GeoDist==1.640458374~"494",  
GeoDist==1.749272882~"495",  
GeoDist==1.971861251~"496",  
GeoDist==2.200544153~"497",  
GeoDist==3.270200202~"498",  
GeoDist==0.048825736~"499",  
GeoDist==0.035656295~"500",  
GeoDist==0.090643716~"501",  
GeoDist==2.111945154~"502",  
GeoDist==1.20839196~"503",  
GeoDist==1.600399485~"504",  
GeoDist==2.320075383~"505",  
GeoDist==2.280010983~"506",  
GeoDist==0.876946435~"507",  
GeoDist==0.718244719~"508",  
GeoDist==0.293462828~"509",  
GeoDist==0.418213219~"510",  
GeoDist==2.533872383~"511",  
GeoDist==2.292547254~"512",  
GeoDist==0.939399681~"513",

GeoDist==1.052263041~"514",  
GeoDist==0.111195641~"515",  
GeoDist==0.628555469~"516",  
GeoDist==1.438051753~"517",  
GeoDist==1.263216606~"518",  
GeoDist==0.684930433~"519",  
GeoDist==0.424951379~"520",  
GeoDist==0.424326415~"521",  
GeoDist==1.30660578~"522",  
GeoDist==1.094824359~"523",  
GeoDist==1.354312224~"524",  
GeoDist==0.473648934~"525",  
GeoDist==1.521347964~"526",  
GeoDist==0.013250151~"527",  
GeoDist==0.044369653~"528",  
GeoDist==2.066129731~"529",  
GeoDist==1.160005534~"530",  
GeoDist==1.552561163~"531",  
GeoDist==2.274170836~"532",  
GeoDist==2.232064809~"533",  
GeoDist==0.838165294~"534",  
GeoDist==0.709401733~"535",  
GeoDist==0.324853283~"536",  
GeoDist==0.383687436~"537",  
GeoDist==2.48641659~"538",  
GeoDist==2.246735954~"539",  
GeoDist==0.899073744~"540",  
GeoDist==1.018877476~"541",  
GeoDist==0.144399979~"542",  
GeoDist==0.601065366~"543",  
GeoDist==1.403380562~"544",  
GeoDist==1.245055694~"545",  
GeoDist==0.679656085~"546",  
GeoDist==0.387749893~"547",  
GeoDist==0.387129765~"548",  
GeoDist==1.294446619~"549",  
GeoDist==1.089800022~"550",  
GeoDist==1.354467982~"551",  
GeoDist==0.519514851~"552",  
GeoDist==1.569948301~"553",  
GeoDist==0.056905081~"554",  
GeoDist==2.078928005~"555",  
GeoDist==1.173243727~"556",  
GeoDist==1.565731513~"557",  
GeoDist==2.286988291~"558",  
GeoDist==2.245251951~"559",  
GeoDist==0.849306935~"560",  
GeoDist==0.712701825~"561",

GeoDist==0.316869688~"562",  
GeoDist==0.391818077~"563",  
GeoDist==2.499527587~"564",  
GeoDist==2.259534269~"565",  
GeoDist==0.910597514~"566",  
GeoDist==1.028692948~"567",  
GeoDist==0.133642958~"568",  
GeoDist==0.609270374~"569",  
GeoDist==1.413548863~"570",  
GeoDist==1.250962255~"571",  
GeoDist==0.68198234~"572",  
GeoDist==0.396729357~"573",  
GeoDist==0.396107275~"574",  
GeoDist==1.298772735~"575",  
GeoDist==1.092186626~"576",  
GeoDist==1.355499965~"577",  
GeoDist==0.507488551~"578",  
GeoDist==1.5569359~"579",  
GeoDist==2.022047163~"580",  
GeoDist==1.118161381~"581",  
GeoDist==1.5097858~"582",  
GeoDist==2.230117626~"583",  
GeoDist==2.189426127~"584",  
GeoDist==0.794736792~"585",  
GeoDist==0.684649038~"586",  
GeoDist==0.340115078~"587",  
GeoDist==0.374226723~"588",  
GeoDist==2.443235198~"589",  
GeoDist==2.202653281~"590",  
GeoDist==0.855190218~"591",  
GeoDist==0.977568721~"592",  
GeoDist==0.187943434~"593",  
GeoDist==0.56338169~"594",  
GeoDist==1.361388278~"595",  
GeoDist==1.212603435~"596",  
GeoDist==0.657858174~"597",  
GeoDist==0.374567603~"598",  
GeoDist==0.373960895~"599",  
GeoDist==1.266210513~"600",  
GeoDist==1.067261149~"601",  
GeoDist==1.335830289~"602",  
GeoDist==0.551252933~"603",  
GeoDist==1.607615156~"604",  
GeoDist==0.967784297~"605",  
GeoDist==0.581531788~"606",  
GeoDist==0.208413073~"607",  
GeoDist==0.390690891~"608",  
GeoDist==1.294849736~"609",



GeoDist==1.831071603~"610",  
GeoDist==2.213039177~"611",  
GeoDist==1.954898842~"612",  
GeoDist==0.497239441~"613",  
GeoDist==0.180606302~"614",  
GeoDist==1.218237852~"615",  
GeoDist==1.25259091~"616",  
GeoDist==2.203083203~"617",  
GeoDist==1.62826623~"618",  
GeoDist==0.991186946~"619",  
GeoDist==1.557725307~"620",  
GeoDist==1.887054591~"621",  
GeoDist==1.922102139~"622",  
GeoDist==1.92236128~"623",  
GeoDist==1.722290869~"624",  
GeoDist==1.883369444~"625",  
GeoDist==2.063726219~"626",  
GeoDist==2.488722476~"627",  
GeoDist==3.545491992~"628",  
GeoDist==0.402880439~"629",  
GeoDist==1.167055105~"630",  
GeoDist==1.075720946~"631",  
GeoDist==0.611354526~"632",  
GeoDist==1.177066939~"633",  
GeoDist==1.374496061~"634",  
GeoDist==0.993486355~"635",  
GeoDist==1.337821359~"636",  
GeoDist==1.143039605~"637",  
GeoDist==0.548628219~"638",  
GeoDist==0.756987843~"639",  
GeoDist==1.285091882~"640",  
GeoDist==0.89807746~"641",  
GeoDist==0.857675891~"642",  
GeoDist==1.229189691~"643",  
GeoDist==1.216317019~"644",  
GeoDist==0.961128184~"645",  
GeoDist==0.961434495~"646",  
GeoDist==1.390630115~"647",  
GeoDist==1.409536703~"648",  
GeoDist==1.678410688~"649",  
GeoDist==1.64006398~"650",  
GeoDist==2.712075655~"651",  
GeoDist==0.772397676~"652",  
GeoDist==0.679897006~"653",  
GeoDist==0.887555445~"654",  
GeoDist==1.467062009~"655",  
GeoDist==1.745163769~"656",  
GeoDist==1.395845837~"657",

GeoDist==0.936407858~"658",  
GeoDist==0.750152072~"659",  
GeoDist==0.811115361~"660",  
GeoDist==0.945186226~"661",  
GeoDist==1.681599352~"662",  
GeoDist==1.213774786~"663",  
GeoDist==0.869447387~"664",  
GeoDist==1.371982878~"665",  
GeoDist==1.514895717~"666",  
GeoDist==1.363603097~"667",  
GeoDist==1.363917943~"668",  
GeoDist==1.543103541~"669",  
GeoDist==1.626460587~"670",  
GeoDist==1.864984694~"671",  
GeoDist==2.016323208~"672",  
GeoDist==3.087635405~"673",  
GeoDist==0.3606545~"674",  
GeoDist==1.501549324~"675",  
GeoDist==2.032020398~"676",  
GeoDist==2.420946194~"677",  
GeoDist==2.157649944~"678",  
GeoDist==0.339631322~"679",  
GeoDist==0.030274755~"680",  
GeoDist==1.425238011~"681",  
GeoDist==1.45185097~"682",  
GeoDist==2.410822468~"683",  
GeoDist==1.834250206~"684",  
GeoDist==1.171226044~"685",  
GeoDist==1.735619627~"686",  
GeoDist==2.088611987~"687",  
GeoDist==2.124956969~"688",  
GeoDist==2.125229511~"689",  
GeoDist==1.896708445~"690",  
GeoDist==2.069682125~"691",  
GeoDist==2.23822047~"692",  
GeoDist==2.696655581~"693",  
GeoDist==3.752197537~"694",  
GeoDist==1.537170109~"695",  
GeoDist==2.104206531~"696",  
GeoDist==2.421638542~"697",  
GeoDist==2.057954517~"698",  
GeoDist==0.277959482~"699",  
GeoDist==0.368954118~"700",  
GeoDist==1.459076424~"701",  
GeoDist==1.542830837~"702",  
GeoDist==2.359912164~"703",  
GeoDist==1.871016513~"704",  
GeoDist==1.33608678~"705",

GeoDist==1.898120557~"706",  
GeoDist==2.15642098~"707",  
GeoDist==2.026501961~"708",  
GeoDist==2.026864604~"709",  
GeoDist==2.066848808~"710",  
GeoDist==2.204121982~"711",  
GeoDist==2.405855334~"712",  
GeoDist==2.694086~"713",  
GeoDist==3.764184863~"714",  
GeoDist==0.580717731~"715",  
GeoDist==0.92482297~"716",  
GeoDist==0.896754051~"717",  
GeoDist==1.759955735~"718",  
GeoDist==1.472294581~"719",  
GeoDist==0.078122909~"720",  
GeoDist==0.236184201~"721",  
GeoDist==0.982540605~"722",  
GeoDist==0.335239041~"723",  
GeoDist==0.580688256~"724",  
GeoDist==0.678007537~"725",  
GeoDist==0.627410109~"726",  
GeoDist==0.867130971~"727",  
GeoDist==0.86702929~"728",  
GeoDist==0.820404287~"729",  
GeoDist==0.801985279~"730",  
GeoDist==1.079046757~"731",  
GeoDist==1.200017092~"732",  
GeoDist==2.25068455~"733",  
GeoDist==0.569515965~"734",  
GeoDist==0.996597508~"735",  
GeoDist==2.31310694~"736",  
GeoDist==2.001975306~"737",  
GeoDist==0.656120478~"738",  
GeoDist==0.581307141~"739",  
GeoDist==0.822499546~"740",  
GeoDist==0.29091546~"741",  
GeoDist==0.928862721~"742",  
GeoDist==0.572229916~"743",  
GeoDist==0.060437154~"744",  
GeoDist==0.981027393~"745",  
GeoDist==0.980582241~"746",  
GeoDist==0.590695551~"747",  
GeoDist==0.385004796~"748",  
GeoDist==0.666092158~"749",  
GeoDist==0.79841956~"750",  
GeoDist==1.757174211~"751",  
GeoDist==0.708518309~"752",  
GeoDist==2.662163923~"753",

GeoDist==2.392134075~"754",  
GeoDist==0.998621694~"755",  
GeoDist==1.045055622~"756",  
GeoDist==0.34657368~"757",  
GeoDist==0.608869435~"758",  
GeoDist==1.429057867~"759",  
GeoDist==1.141707852~"760",  
GeoDist==0.519067638~"761",  
GeoDist==0.712181496~"762",  
GeoDist==0.711564387~"763",  
GeoDist==1.149014074~"764",  
GeoDist==0.905336995~"765",  
GeoDist==1.134885723~"766",  
GeoDist==0.275733583~"767",  
GeoDist==1.342621985~"768",  
GeoDist==2.326367173~"769",  
GeoDist==2.132714173~"770",  
GeoDist==0.931653418~"771",  
GeoDist==1.121868089~"772",  
GeoDist==0.416778849~"773",  
GeoDist==0.793162269~"774",  
GeoDist==1.473976448~"775",  
GeoDist==1.458436809~"776",  
GeoDist==0.983490397~"777",  
GeoDist==0.033041368~"778",  
GeoDist==0.032859519~"779",  
GeoDist==1.542841674~"780",  
GeoDist==1.379875719~"781",  
GeoDist==1.662256965~"782",  
GeoDist==0.876212619~"783",  
GeoDist==1.872387628~"784",  
GeoDist==0.366227266~"785",  
GeoDist==1.682059273~"786",  
GeoDist==1.739470357~"787",  
GeoDist==2.617150285~"788",  
GeoDist==2.095194744~"789",  
GeoDist==1.488382729~"790",  
GeoDist==2.054893319~"791",  
GeoDist==2.367627211~"792",  
GeoDist==2.294593005~"793",  
GeoDist==2.294938058~"794",  
GeoDist==2.219065174~"795",  
GeoDist==2.379545273~"796",  
GeoDist==2.560592482~"797",  
GeoDist==2.936436151~"798",  
GeoDist==4.002715866~"799",  
GeoDist==1.396076394~"800",  
GeoDist==1.421734305~"801",

GeoDist==2.383647525~"802",  
GeoDist==1.804806358~"803",  
GeoDist==1.141120469~"804",  
GeoDist==1.705642256~"805",  
GeoDist==2.058607016~"806",  
GeoDist==2.099983723~"807",  
GeoDist==2.100251691~"808",  
GeoDist==1.866885537~"809",  
GeoDist==2.039471806~"810",  
GeoDist==2.208418476~"811",  
GeoDist==2.667855~"812",  
GeoDist==3.722889098~"813",  
GeoDist==0.242808508~"814",  
GeoDist==1.043110947~"815",  
GeoDist==0.41318864~"816",  
GeoDist==0.542901329~"817",  
GeoDist==0.709098984~"818",  
GeoDist==0.703884735~"819",  
GeoDist==0.900979124~"820",  
GeoDist==0.900926931~"821",  
GeoDist==0.85963868~"822",  
GeoDist==0.860914404~"823",  
GeoDist==1.132264019~"824",  
GeoDist==1.274140329~"825",  
GeoDist==2.327284661~"826",  
GeoDist==1.161954331~"827",  
GeoDist==0.438605052~"828",  
GeoDist==0.387752403~"829",  
GeoDist==0.474594278~"830",  
GeoDist==0.639113392~"831",  
GeoDist==1.093349844~"832",  
GeoDist==1.093205318~"833",  
GeoDist==0.633662267~"834",  
GeoDist==0.681375982~"835",  
GeoDist==0.930589481~"836",  
GeoDist==1.312359991~"837",  
GeoDist==2.327191769~"838",  
GeoDist==0.73969763~"839",  
GeoDist==1.547088665~"840",  
GeoDist==1.372419259~"841",  
GeoDist==0.786413197~"842",  
GeoDist==0.43171364~"843",  
GeoDist==0.4311~"844",  
GeoDist==1.412359605~"845",  
GeoDist==1.194952137~"846",  
GeoDist==1.448490185~"847",  
GeoDist==0.461230244~"848",  
GeoDist==1.47135787~"849",

GeoDist==0.825651761~"850",  
GeoDist==0.667170202~"851",  
GeoDist==0.32122307~"852",  
GeoDist==0.771273893~"853",  
GeoDist==0.770942101~"854",  
GeoDist==0.75195859~"855",  
GeoDist==0.623976559~"856",  
GeoDist==0.916147737~"857",  
GeoDist==0.879985176~"858",  
GeoDist==1.918624047~"859",  
GeoDist==0.566552574~"860",  
GeoDist==0.9891341~"861",  
GeoDist==1.443542543~"862",  
GeoDist==1.443479799~"863",  
GeoDist==0.732363793~"864",  
GeoDist==0.90057068~"865",  
GeoDist==1.073230145~"866",  
GeoDist==1.692836584~"867",  
GeoDist==2.686022348~"868",  
GeoDist==0.624927301~"869",  
GeoDist==1.435236236~"870",  
GeoDist==1.434937961~"871",  
GeoDist==0.17157501~"872",  
GeoDist==0.362501016~"873",  
GeoDist==0.507780728~"874",  
GeoDist==1.363156176~"875",  
GeoDist==2.247543761~"876",  
GeoDist==0.96970312~"877",  
GeoDist==0.969232002~"878",  
GeoDist==0.632997674~"879",  
GeoDist==0.410205242~"880",  
GeoDist==0.680782818~"881",  
GeoDist==0.741393199~"882",  
GeoDist==1.696954495~"883",  
GeoDist==0.000626099~"884",  
GeoDist==1.522102842~"885",  
GeoDist==1.363285257~"886",  
GeoDist==1.647061657~"887",  
GeoDist==0.888592956~"888",  
GeoDist==1.893277137~"889",  
GeoDist==1.521751013~"890",  
GeoDist==1.362857905~"891",  
GeoDist==1.646613434~"892",  
GeoDist==0.887969838~"893",  
GeoDist==1.892697456~"894",  
GeoDist==0.273275338~"895",  
GeoDist==0.341619209~"896",  
GeoDist==1.345795509~"897",

GeoDist==2.168596096~"898",  
GeoDist==0.292243112~"899",  
GeoDist==1.083739652~"900",  
GeoDist==1.898738004~"901",  
GeoDist==1.271097195~"902",  
GeoDist==1.951354833~"903",  
GeoDist==1.072254026~"904",  
GeoDist==1.086759623~"905",  
GeoDist==3.520950423~"906",  
GeoDist==4.396587752~"907",  
GeoDist==4.558199079~"908",  
GeoDist==1.319218707~"909",  
GeoDist==1.023397519~"910",  
GeoDist==3.080282467~"911",  
GeoDist==3.958302943~"912",  
GeoDist==4.093715932~"913",  
GeoDist==1.170436789~"914",  
GeoDist==0.170064221~"915",  
GeoDist==2.277767813~"916",  
GeoDist==3.150440087~"917",  
GeoDist==3.313792929~"918",  
GeoDist==0.088672995~"919",  
GeoDist==2.434368044~"920",  
GeoDist==0.933595394~"921",  
GeoDist==3.310005072~"922",  
GeoDist==3.471477646~"923",  
GeoDist==0.64813897~"924",  
GeoDist==1.73509856~"925",  
GeoDist==0.233708011~"926",  
GeoDist==0.696003697~"927",  
GeoDist==0.789840145~"928",  
GeoDist==1.766943888~"929",  
GeoDist==0.657224324~"930",  
GeoDist==1.528516145~"931",  
GeoDist==0.105062039~"932",  
GeoDist==0.757551859~"933",  
GeoDist==0.23268047~"934",  
GeoDist==3.174972352~"935",  
GeoDist==0.883914907~"936",  
GeoDist==1.037707391~"937",  
GeoDist==2.931907709~"938",  
GeoDist==0.724180018~"939",  
GeoDist==2.201085236~"940",  
GeoDist==3.107060444~"941",  
GeoDist==2.765841073~"942",  
GeoDist==0.707937871~"943",  
GeoDist==2.042086688~"944",  
GeoDist==0.917244952~"945",

```
GeoDist==2.536165124~"946",
GeoDist==1.894972504~"947",
GeoDist==2.202313767~"948",
GeoDist==4.013162186~"949",
GeoDist==4.189191327~"950",
GeoDist==1.103533713~"951",
GeoDist==0.191559026~"952",
GeoDist==3.782153433~"953",
GeoDist==1.607348621~"954",
GeoDist==3.077550147~"955",
GeoDist==3.973620779~"956",
GeoDist==3.58624667~"957",
GeoDist==1.552677235~"958",
GeoDist==2.877643939~"959",
GeoDist==1.800882351~"960",
GeoDist==3.412771144~"961",
GeoDist==2.776530678~"962",
GeoDist==3.077417658~"963",
GeoDist==3.954886945~"964",
GeoDist==1.75494032~"965",
GeoDist==3.238374144~"966",
GeoDist==4.140440634~"967",
GeoDist==3.76559333~"968",
GeoDist==1.723050114~"969",
GeoDist==3.053339253~"970",
GeoDist==1.953226622~"971",
GeoDist==3.573539397~"972",
GeoDist==2.91822551~"973",
GeoDist==3.239211834~"974",
GeoDist==0.820973015~"975",
GeoDist==1.505908434~"976",
GeoDist==0.029649368~"977",
GeoDist==0.91720047~"978",
GeoDist==0.870803968~"979",
GeoDist==1.534523784~"980",
GeoDist==0.511762328~"981",
GeoDist==1.298693753~"982",
GeoDist==0.336499166~"983",
GeoDist==0.604778431~"984",)) -> df
```

```
#### end ####
```

```
#write.csv(df, file = "200612_testvalues.csv") -> df
```

```
simbygeo<-read.csv("200617_testvalues2.csv")
```

```
SIM_LME<-simbygeo$SIM
```

```
SOR_LME<-simbygeo$SOR
```

```
SNE_LME<-simbygeo$SNE
```



```

GeoDist_LME<-simbygeo$GeoDist
Pd_LME<-as.factor(simbygeo$Pd)
sitecontrast_LME<-as.factor(simbygeo$contrastID)

#####
#Avg
#####
#In order to remove nested data structure average data within comparisons
neg_LME<-subset(simbygeo, Pd=="0")
pos_LME<-subset(simbygeo, Pd=="1")

avgSIMvaluesneg<-aggregate(neg_LME$SIM~neg_LME$contrastID, neg_LME, mean)
#write.csv(avgSIMvaluesneg, file="200713_neg_avgSIM_values.csv")
avgSIMvaluespos<-aggregate(pos_LME$SIM~pos_LME$contrastID, pos_LME, mean)
#write.csv(avgSIMvaluespos, file="200713_pos_avgSIM_values.csv")
avgvaluegeoPos<-aggregate(pos_LME$GeoDist~pos_LME$contrastID, pos_LME, mean)
#write.csv(avgvaluegeoPos, file="200713_pos_avg_valuesGeo.csv")
avgvaluegeoneg<-aggregate(neg_LME$GeoDist~neg_LME$contrastID, neg_LME, mean)
#write.csv(avgvaluegeoneg, file="200713_neg_avg_valuesGeo.csv")
avgSORvaluesneg<-aggregate(neg_LME$SOR~neg_LME$contrastID, neg_LME, mean)
#write.csv(avgSORvaluesneg, file="200713_neg_avgSOR_values.csv")
avgSORvaluespos<-aggregate(pos_LME$SOR~pos_LME$contrastID, pos_LME, mean)
#write.csv(avgSORvaluespos, file="200713_pos_avgSOR_values.csv")
avgSNEvaluesneg<-aggregate(neg_LME$SNE~neg_LME$contrastID, neg_LME, mean)
#write.csv(avgSNEvaluesneg, file="200713_neg_avgSNE_values.csv")
avgSNEvaluespos<-aggregate(pos_LME$SNE~pos_LME$contrastID, pos_LME, mean)
#write.csv(avgSNEvaluespos, file="200713_pos_avgSNE_values.csv")

#avgSIMvaluespos<-read.csv("200713_pos_avgSIM_values.csv")
#avgvaluegeoPos<-read.csv("200713_pos_avg_valuesGeo.csv")
#avgSORvaluespos<-read.csv("200713_pos_avgSOR_values.csv")
#avgSNEvaluespos<-read.csv("200713_pos_avgSNE_values.csv")
#half<-merge(avgSIMvaluespos,avgvaluegeoPos, by="contrastID" )
#other<-merge(avgSORvaluespos,avgSNEvaluespos, by="contrastID" )
#pos_avgs<-merge(half, other, by="contrastID")
#write.csv(pos_avgs, file="200713_pos_avg.csv")

#avgSIMvaluesneg<-read.csv("200713_neg_avgSIM_values.csv")
#avgvaluegeoneg<-read.csv("200713_neg_avg_valuesGeo.csv")
#avgSORvaluesneg<-read.csv("200713_neg_avgSOR_values.csv")
#avgSNEvaluesneg<-read.csv("200713_neg_avgSNE_values.csv")
#halfneg<-merge(avgSIMvaluesneg,avgvaluegeoneg, by="contrastID" )
#otherneg<-merge(avgSORvaluesneg,avgSNEvaluesneg, by="contrastID" )
#neg_avgs<-merge(halfneg, otherneg, by="contrastID")
#write.csv(neg_avgs, file="200713_neg_avg.csv")

```

```

totalavgs<-read.csv("200713_totalAvg.csv")
AvgSIM<-totalavgs$AvgSIM
AvgSOR<-totalavgs$AvgSOR
AvgSNE<-totalavgs$AvgSNE
avgdist<-totalavgs$AvgGeoDist
avgpd<-as.factor(totalavgs$Pd)
avgsitecontrast<-as.factor(totalavgs$contrastID)

#Graphing
DDRPos<-subset(totalavgs, Pd=="1")
DDRNeg<-subset(totalavgs, Pd=="0")
PosAVGSOR<-DDRPos$AvgSOR
PosAVGSIM<-DDRPos$AvgSIM
PosAVGSNE<-DDRPos$AvgSNE
Posdist<-DDRPos$AvgGeoDist
NegAVGSOR<-DDRNeg$AvgSOR
NegAVGSIM<-DDRNeg$AvgSIM
NegAVGSNE<-DDRNeg$AvgSNE
Negdist<-DDRNeg$AvgGeoDist

mod4<-glm(AvgSIM~avgdist*avgpd,family=binomial)
summary(mod4)
Anova(mod4, type=2)
par(mfrow=c(1,2))
plot(residuals(mod4)~fitted(mod4), main="residuals vs fitted")
qqnorm(residuals(mod4))
qqline(residuals(mod4))
par(mfrow=c(1,1))

B2 <- glm(PosAVGSOR~Posdist, family=binomial, data=DDRPos)
summary(B2)
B2_1<-glm(NegAVGSOR~Negdist, family=binomial, data=DDRNeg)
summary(B2_1)
plot(PosAVGSOR~Posdist, data=DDRPos, type='n', bty="n", xlim=c(0,5), ylim=c(0.8,1),xlab="(log)
Geographic Distance", ylab="Average SOR")
points(Posdist, PosAVGSOR, pch=19, cex=0.75, col="black", bg="black")
points(Negdist, NegAVGSOR, pch=19, cex=0.75, col="grey", bg="grey")
axis(side=1, lwd=2)
axis(side=2, lwd=2)
title("Total Beta Diversity", adj=0, line=0.25, cex.main=1.5)
title("B", adj=1, line=-17, cex.main=2)
pred <-seq (0,5,0.01)
B2.pred <- predict(B2, list(Posdist=pred), type="response", data=DDRPos)
lines(pred, B2.pred, lty=2, col="blue", lwd=5)
B2_1.pred<-predict(B2_1, list(Negdist=pred), type="response", data=DDRNeg)
lines(pred, B2_1.pred, lty=1, col="blue", lwd=5)

```

```

mod4_1<-glm(AvgSOR~avgdist*avgpd,family=binomial)# Warning of non-interger #successess in a
binomial glm is ok, just telling us that we have set it to binomial
summary(mod4_1)
Anova(mod4_1, type=2)
par(mfrow=c(1,2))
plot(residuals(mod4_1)~fitted(mod4_1), main="residuals vs fitted")
qqnorm(residuals(mod4_1))
qqline(residuals(mod4_1))
par(mfrow=c(1,1))

```

```

B3 <- glm(PosAVGSIM~Posdist, family=binomial, data=DDRPos)
summary(B3)
B3_1<-glm(NegAVGSIM~Negdist, family=binomial, data=DDRNeg)
summary(B3_1)
plot(PosAVGSIM~Posdist, data=DDRPos, type='n', bty="n", xlim=c(0,5), xlab="(log) Geographic
Distance", ylab="Average SIM")
points(Posdist, PosAVGSIM, pch=19, cex=0.75, col="black", bg="black")
points(Negdist, NegAVGSIM, pch=19, cex=0.75, col="grey", bg="grey")
axis(side=1, lwd=2)
axis(side=2, lwd=2)
title("Turnover", adj=0, line=0.25, cex.main=1.5)
title("C", adj=1, line=-17, cex.main=2)
pred <-seq (0,5,0.01)
B3.pred <- predict(B3, list(Posdist=pred), type="response", data=DDRPos)
lines(pred, B3.pred, lty=2, col="blue", lwd=5)
B3_1.pred<-predict(B3_1, list(Negdist=pred), type="response", data=DDRNeg)
lines(pred, B3_1.pred, lty=1, col="blue", lwd=5)

```

```

mod4_2<-glm(AvgSNE~avgdist*avgpd,family=binomial)# Warning of non-interger #successess in a
binomial glm is ok, just telling us that we have set it to binomial
summary(mod4_2)
Anova(mod4_2, type=2)
par(mfrow=c(1,2))
plot(residuals(mod4_2)~fitted(mod4_2), main="residuals vs fitted")
qqnorm(residuals(mod4_2))
qqline(residuals(mod4_2))
par(mfrow=c(1,1))

```

```

B4 <- glm(PosAVGSNE~Posdist, family=binomial, data=DDRPos)
summary(B3)
B4_1<-glm(NegAVGSNE~Negdist, family=binomial, data=DDRNeg)
summary(B4_1)
plot(PosAVGSNE~Posdist, data=DDRPos, type='n', bty="n", xlim=c(0,5), ylim=c(0,0.15),xlab="(log)
Geographic Distance", ylab="Average SNE")
points(Posdist, PosAVGSNE, pch=16, cex=0.75, col="black", bg="black")
points(Negdist, NegAVGSNE, pch=19, cex=0.75, col="grey", bg="grey")
axis(side=1, lwd=2)

```

```

axis(side=2, lwd=2)
title("Nestedness", adj=0, line=0.25, cex.main=1.5)
title("D", adj=1, line=-17, cex.main=2)
pred <- seq (0,5,0.01)
B4.pred <- predict(B4, list(Posdist=pred), type="response", data=DDRPos)
lines(pred, B4.pred, lty=2, col="blue", lwd=5)
B4_1.pred<-predict(B4_1, list(Negdist=pred), type="response", data=DDRNeg)
lines(pred, B4_1.pred, lty=1, col="blue", lwd=5)
legend(3.5, 0.16, legend=c("Negative", "Positive"),
      col=c("blue", "blue"), lty=1:2, cex=0.8,box.lty=0)
####end####
#####
#Copies
#####
####Copies####
copies<-positive$copies
logcopies<-log(copies+1)
copiesdist<-dist(copies, method="euclidean")
logcopiesdist<-dist(logcopies)

####Copies Dataframe code ####
#posdfSIM<-as.matrix(SIM_pos)
#posdfSIM[upper.tri(posdfSIM)] <- NA
#posdfSOR<-as.matrix(SOR_pos)
#posdfSOR[upper.tri(posdfSOR)] <- NA
#posdfSNE<-as.matrix(SNE_pos)
#posdfSNE[upper.tri(posdfSNE)] <- NA
#logcopiesmat<-as.matrix(logcopiesdist)
#logcopiesmat[upper.tri(logcopiesmat)] <- NA
#rownames(logcopiesmat)<-positive$Group
#colnames(logcopiesmat)<-positive$Group
#SIM_posmelt<-melt(posdfSIM)
#SOR_posmelt<-melt(posdfSOR)
#SNE_posmelt<-melt(posdfSNE)
#posdistdf<-as.matrix(posdist)
#rownames(posdistdf)<-positive$Group
#colnames(posdistdf)<-positive$Group
#posdistdf[upper.tri(posdistdf)] <- NA
#posdistmelt<-melt(posdistdf)
#logcopiesmelt<-melt(logcopiesmat)
#write.csv(posdistmelt, file="2006_20posdistmelt.csv")
#write.csv(SIM_posmelt, file="2006_20_SIM_posmelt.csv")
#write.csv(SOR_posmelt, file="2006_20_SOR_posmelt.csv")
#write.csv(SNE_posmelt, file="2006_20_SNE_posmelt.csv")
#write.csv(logcopiesmelt, file="2006_20_copies_posmelt.csv")

#GeoPos<-read.csv("2006_20posdistmelt.csv")
#SIMPos<-read.csv("2006_20_SIM_posmelt.csv")

```

```

#SNEPos<-read.csv("2006_20_SNE_posmelt.csv")
#SORPos<-read.csv("2006_20_SOR_posmelt.csv")
#copiesPos<-read.csv("2006_20_copies_posmelt.csv")
#Total<-read.csv("200612_totalgeodist.csv")

#posSIM_database1<-merge(GeoPos,SIMPos, by="g")
#posSIM_database2<-merge(SORPos,SNEPos, by="g")
#posSIM_database3<-merge(copiesPos,posSIM_database2, by="g")
#posSIM_database4<-merge(posSIM_database3,posSIM_database1, by="g")

#write.csv(posSIM_database4, file="200621_Pos_database.csv")

#df <- read.csv("200621_Pos_database.csv", header = TRUE, row.names = NULL)

#dist.unique<-unique(df$GeoDist)
#write.csv(dist.unique, file = "200621_testunique.csv")
#### Contrasts ####
df %>%
  mutate(contrastID = case_when( GeoDist==0~"1",
                                GeoDist==1.5097858~"2",
                                GeoDist==0.402880439~"3",
                                GeoDist==1.791783621~"4",
                                GeoDist==0.996404482~"5",
                                GeoDist==0.581531788~"6",
                                GeoDist==2.066129731~"7",
                                GeoDist==2.054876971~"8",
                                GeoDist==0.967784297~"9",
                                GeoDist==2.182943807~"10",
                                GeoDist==0.944126772~"11",
                                GeoDist==0.420564816~"12",
                                GeoDist==0.291333197~"13",
                                GeoDist==1.227921213~"14",
                                GeoDist==0.013250151~"15",
                                GeoDist==0.31860752~"16",
                                GeoDist==0.863139413~"17",
                                GeoDist==0.390690891~"18",
                                GeoDist==0.473648934~"19",
                                GeoDist==0.330083722~"20",
                                GeoDist==1.74871363~"21",
                                GeoDist==1.626460587~"22",
                                GeoDist==1.757356682~"23",
                                GeoDist==0.263555892~"24",
                                GeoDist==0.611354526~"25",
                                GeoDist==2.200544153~"26",
                                GeoDist==1.067261149~"27",
                                GeoDist==0.871493558~"28",
                                GeoDist==1.722485878~"29",
                                GeoDist==0.887555445~"30",

```

GeoDist==1.389153923~"31",  
GeoDist==1.118161381~"32",  
GeoDist==2.416751496~"33",  
GeoDist==1.552561163~"34",  
GeoDist==2.022047163~"35",  
GeoDist==0.374081583~"36",  
GeoDist==1.457536879~"37",  
GeoDist==0.044369653~"38",  
GeoDist==1.294849736~"39",  
GeoDist==0.399847805~"40",  
GeoDist==1.831071603~"41",  
GeoDist==0.9145334~"42",  
GeoDist==2.108384487~"43",  
GeoDist==2.072612284~"44",  
GeoDist==0.666310432~"45",  
GeoDist==1.33509152~"46",  
GeoDist==0.519514851~"47",  
GeoDist==0.886296062~"48",  
GeoDist==0.911839658~"49",  
GeoDist==2.488722476~"50",  
GeoDist==2.232064809~"51",  
GeoDist==1.701140174~"52",  
GeoDist==2.387310202~"53",  
GeoDist==0.828551446~"54",  
GeoDist==0.925077407~"55",  
GeoDist==0.809592161~"56",  
GeoDist==2.20463378~"57",  
GeoDist==1.600399485~"58",  
GeoDist==1.144756753~"59",  
GeoDist==1.160005534~"60",  
GeoDist==1.42894965~"61",  
GeoDist==0.794736792~"62",  
GeoDist==1.43226328~"63",  
GeoDist==0.035656295~"64",  
GeoDist==0.641326688~"65",  
GeoDist==1.565731513~"66",  
GeoDist==0.943187679~"67",  
GeoDist==2.078928005~"68",  
GeoDist==1.409536703~"69",  
GeoDist==1.421838839~"70",  
GeoDist==0.996258452~"71",  
GeoDist==0.424894247~"72",  
GeoDist==0.51555363~"73",  
GeoDist==1.256658636~"74",  
GeoDist==2.612321942~"75",  
GeoDist==0.613055534~"76",  
GeoDist==0.254525895~"77",  
GeoDist==0.838165294~"78",

GeoDist==1.749272882~"79",  
GeoDist==2.286988291~"80",  
GeoDist==0.945952473~"81",  
GeoDist==2.850846701~"82",  
GeoDist==2.095586338~"83",  
GeoDist==0.048825736~"84",  
GeoDist==0.709401733~"85",  
GeoDist==1.110908381~"86",  
GeoDist==0.964223147~"87",  
GeoDist==0.385987091~"88",  
GeoDist==1.204750267~"89",  
GeoDist==0.196917975~"90",  
GeoDist==1.892697456~"91",  
GeoDist==1.661557752~"92",  
GeoDist==1.700349417~"93",  
GeoDist==1.398601493~"94",  
GeoDist==1.903913356~"95",  
GeoDist==1.002261517~"96",  
GeoDist==0.74904653~"97",  
GeoDist==0.786130753~"98",  
GeoDist==1.860707935~"99",  
GeoDist==1.883369444~"100",  
GeoDist==1.449610188~"101",  
GeoDist==0.560580317~"102",  
GeoDist==2.016323208~"103",  
GeoDist==0.029456655~"104",  
GeoDist==1.5569359~"105",  
GeoDist==1.089800022~"106",  
GeoDist==0.857675891~"107",  
GeoDist==2.051503555~"108",  
GeoDist==0.3606545~"109",  
GeoDist==0.056905081~"110",  
GeoDist==0.608595845~"111",  
GeoDist==0.679897006~"112",  
GeoDist==0.83172713~"113",  
GeoDist==1.828934569~"114",  
GeoDist==1.728862072~"115",  
GeoDist==1.075720946~"116",  
GeoDist==0.538244543~"117",  
GeoDist==1.271903372~"118",  
GeoDist==1.92236128~"119",  
GeoDist==0.786406682~"120",  
GeoDist==1.083739652~"121",  
GeoDist==0.285642571~"122",  
GeoDist==1.794530505~"123",  
GeoDist==0.620589047~"124",  
GeoDist==0.534923562~"125",  
GeoDist==2.721946553~"126",

GeoDist==1.173243727~"127",  
GeoDist==1.706852972~"128",  
GeoDist==1.741043977~"129",  
GeoDist==1.324444343~"130",  
GeoDist==1.374496061~"131",  
GeoDist==0.505765528~"132",  
GeoDist==0.718244719~"133",  
GeoDist==1.948514933~"134",  
GeoDist==1.326056323~"135",  
GeoDist==0.507488551~"136",  
GeoDist==1.961552143~"137",  
GeoDist==1.092186626~"138",  
GeoDist==2.438924313~"139",  
GeoDist==1.167055105~"140",  
GeoDist==1.407018832~"141",  
GeoDist==0.961434495~"142",  
GeoDist==1.310379212~"143",  
GeoDist==2.517913643~"144",  
GeoDist==1.467062009~"145",  
GeoDist==2.111945154~"146",  
GeoDist==3.215234048~"147",  
GeoDist==1.073963045~"148",  
GeoDist==0.030274755~"149",  
GeoDist==2.189426127~"150",  
GeoDist==1.461894232~"151",  
GeoDist==0.647344754~"152",  
GeoDist==0.396107275~"153",  
GeoDist==1.569948301~"154",  
GeoDist==2.712075655~"155",  
GeoDist==0.476557953~"156",  
GeoDist==0.887969838~"157",  
GeoDist==2.245251951~"158",  
GeoDist==0.561137447~"159",  
GeoDist==0.957560105~"160",  
GeoDist==0.090643716~"161",  
GeoDist==1.780711337~"162",  
GeoDist==0.38151491~"163",  
GeoDist==1.425243087~"164",  
GeoDist==1.441690879~"165",  
GeoDist==2.326106897~"166",  
GeoDist==1.363917943~"167",  
GeoDist==0.971278002~"168",  
GeoDist==1.74423104~"169",  
GeoDist==2.204121982~"170",  
GeoDist==2.537570467~"171",  
GeoDist==0.712701825~"172",  
GeoDist==1.858793307~"173",  
GeoDist==1.313440762~"174",



GeoDist==3.574387635~"175",  
GeoDist==1.338823605~"176",  
GeoDist==1.978638224~"177",  
GeoDist==0.966164021~"178",  
GeoDist==0.27579855~"179",  
GeoDist==1.707189656~"180",  
GeoDist==1.701610184~"181",  
GeoDist==2.470149569~"182",  
GeoDist==1.754234876~"183",  
GeoDist==1.319866302~"184",  
GeoDist==1.329273545~"185",  
GeoDist==1.030086378~"186",  
GeoDist==1.507189912~"187",  
GeoDist==0.308193063~"188",  
GeoDist==1.284026106~"189",  
GeoDist==2.101053879~"190",  
GeoDist==1.149621026~"191",  
GeoDist==1.362857905~"192",  
GeoDist==0.076814033~"193",  
GeoDist==0.542901329~"194",  
GeoDist==0.551252933~"195",  
GeoDist==0.290105293~"196",  
GeoDist==1.047633173~"197",  
GeoDist==0.467055337~"198",  
GeoDist==2.640902005~"199",  
GeoDist==2.141400392~"200",  
GeoDist==0.387129765~"201",  
GeoDist==0.960605794~"202",  
GeoDist==0.801985279~"203",  
GeoDist==1.978488037~"204",  
GeoDist==1.537170109~"205",  
GeoDist==0.697909901~"206",  
GeoDist==1.757174211~"207",  
GeoDist==0.368954118~"208",  
GeoDist==1.236631568~"209",  
GeoDist==1.324273485~"210",  
GeoDist==0.324853283~"211",  
GeoDist==2.020748402~"212",  
GeoDist==1.379417315~"213",  
GeoDist==1.339083638~"214",  
GeoDist==0.730815489~"215",  
GeoDist==1.335529661~"216",  
GeoDist==1.560822104~"217",  
GeoDist==0.967952012~"218",  
GeoDist==0.494133804~"219",  
GeoDist==1.974802208~"220",  
GeoDist==1.745163769~"221",  
GeoDist==1.465905806~"222",

GeoDist==0.580717731~"223",  
GeoDist==1.62826623~"224",  
GeoDist==0.728677246~"225",  
GeoDist==0.564785632~"226",  
GeoDist==1.522216348~"227",  
GeoDist==0.327775936~"228",  
GeoDist==0.599633475~"229",  
GeoDist==1.59397345~"230",  
GeoDist==2.274170836~"231",  
GeoDist==1.038667487~"232",  
GeoDist==1.875125575~"233",  
GeoDist==1.16778086~"234",  
GeoDist==1.216317019~"235",  
GeoDist==3.087635405~"236",  
GeoDist==0.341663772~"237",  
GeoDist==0.958348196~"238",  
GeoDist==0.541670302~"239",  
GeoDist==0.478570777~"240",  
GeoDist==0.832435325~"241",  
GeoDist==1.914894603~"242",  
GeoDist==0.684649038~"243",  
GeoDist==1.072254026~"244",  
GeoDist==2.238492708~"245",  
GeoDist==1.324493267~"246",  
GeoDist==1.10431629~"247",  
GeoDist==0.543398537~"248",  
GeoDist==0.952102163~"249",  
GeoDist==1.094824359~"250",  
GeoDist==0.849306935~"251",  
GeoDist==1.82960507~"252",  
GeoDist==1.066452383~"253",  
GeoDist==1.755662278~"254",  
GeoDist==0.179027712~"255",  
GeoDist==2.213039177~"256",  
GeoDist==1.355499965~"257",  
GeoDist==3.545491992~"258",  
GeoDist==1.241800742~"259",  
GeoDist==1.951354833~"260",  
GeoDist==0.784450002~"261",  
GeoDist==1.64006398~"262",  
GeoDist==2.694086~"263",  
GeoDist==2.475698895~"264",  
GeoDist==1.898738004~"265",  
GeoDist==1.681599352~"266",  
GeoDist==2.242221867~"267",  
GeoDist==0.79841956~"268",  
GeoDist==2.005506117~"269",  
GeoDist==2.517460799~"270",

GeoDist==0.772397676~"271",  
GeoDist==1.908492334~"272",  
GeoDist==2.104206531~"273",  
GeoDist==1.521347964~"274",  
GeoDist==0.340115078~"275",  
GeoDist==2.1809561~"276",  
GeoDist==0.877550124~"277",  
GeoDist==3.270200202~"278",  
GeoDist==0.580697864~"279",  
GeoDist==1.967177528~"280",  
GeoDist==1.203405273~"281",  
GeoDist==0.879985176~"282",  
GeoDist==1.449652682~"283",  
GeoDist==2.923054939~"284",  
GeoDist==1.561515228~"285",  
GeoDist==2.277223305~"286",  
GeoDist==0.208413073~"287",  
GeoDist==2.596768695~"288",  
GeoDist==1.354312224~"289",  
GeoDist==1.834944586~"290",  
GeoDist==0.914313194~"291",  
GeoDist==2.280010983~"292",  
GeoDist==1.378322912~"293",  
GeoDist==1.028692948~"294",  
GeoDist==1.135855916~"295",  
GeoDist==0.772005426~"296",  
GeoDist==1.285091882~"297",  
GeoDist==0.510064177~"298",  
GeoDist==2.817564725~"299",  
GeoDist==1.922102139~"300",  
GeoDist==0.802054431~"301",  
GeoDist==0.534038062~"302",  
GeoDist==1.010503693~"303",  
GeoDist==1.121868089~"304",  
GeoDist==2.063726219~"305",  
GeoDist==0.666092158~"306",  
GeoDist==2.357506619~"307",  
GeoDist==0.89807746~"308",  
GeoDist==0.598288301~"309",  
GeoDist==0.766581449~"310",  
GeoDist==2.012695867~"311",  
GeoDist==1.031291581~"312",  
GeoDist==1.887054591~"313",  
GeoDist==0.083643073~"314",  
GeoDist==2.230117626~"315",  
GeoDist==2.355523942~"316",  
GeoDist==1.288800999~"317",  
GeoDist==3.144499556~"318",

GeoDist==1.692836584~"319",  
GeoDist==0.993486355~"320",  
GeoDist==1.927741539~"321",  
GeoDist==1.6706015~"322",  
GeoDist==1.942257592~"323",  
GeoDist==0.6811341~"324",  
GeoDist==1.607615156~"325",  
GeoDist==0.569515965~"326",  
GeoDist==1.656981983~"327",  
GeoDist==0.738676899~"328",  
GeoDist==1.110782182~"329",  
GeoDist==0.451015762~"330",  
GeoDist==1.216987717~"331",  
GeoDist==1.143039605~"332",  
GeoDist==0.132370109~"333",  
GeoDist==0.684182945~"334",  
GeoDist==2.421638542~"335",  
GeoDist==0.427187547~"336",  
GeoDist==2.203083203~"337",  
GeoDist==0.964973662~"338",  
GeoDist==2.086893339~"339",  
GeoDist==0.905336995~"340",  
GeoDist==1.394486318~"341",  
GeoDist==1.162886638~"342",  
GeoDist==1.871016513~"343",  
GeoDist==0.449898611~"344",  
GeoDist==1.484650426~"345",  
GeoDist==1.410984598~"346",  
GeoDist==1.323716454~"347",  
GeoDist==2.058607016~"348",  
GeoDist==1.954898842~"349",  
GeoDist==1.422396584~"350",  
GeoDist==1.20839196~"351",  
GeoDist==0.741393199~"352",  
GeoDist==0.776060382~"353",  
GeoDist==2.069682125~"354",  
GeoDist==0.720608595~"355",  
GeoDist==0.316869688~"356",  
GeoDist==2.026501961~"357",  
GeoDist==2.320075383~"358",  
GeoDist==0.750152072~"359",  
GeoDist==1.616218665~"360",  
GeoDist==0.883069683~"361",  
GeoDist==1.404488882~"362",  
GeoDist==0.80474225~"363",  
GeoDist==1.124914596~"364",  
GeoDist==1.233017438~"365",  
GeoDist==0.961128184~"366",

GeoDist==1.390630115~"367",  
GeoDist==4.002715866~"368",  
GeoDist==0.976872935~"369",  
GeoDist==2.359912164~"370",  
GeoDist==0.601065366~"371",  
GeoDist==1.411903641~"372",  
GeoDist==1.951355315~"373",  
GeoDist==2.594822404~"374",  
GeoDist==0.850934089~"375",  
GeoDist==0.700678169~"376",  
GeoDist==0.047350803~"377",  
GeoDist==0.396729357~"378",  
GeoDist==0.416778849~"379",  
GeoDist==1.236838722~"380",  
GeoDist==2.358408059~"381",  
GeoDist==0.762619727~"382",  
GeoDist==0.767652536~"383",  
GeoDist==2.168596096~"384",  
GeoDist==0.90961362~"385",  
GeoDist==1.177066939~"386",  
GeoDist==4.474073447~"387",  
GeoDist==0.888592956~"388",  
GeoDist==1.208144917~"389",  
GeoDist==0.923624561~"390",  
GeoDist==0.877308772~"391",  
GeoDist==0.891621576~"392",  
GeoDist==2.420946194~"393",  
GeoDist==2.076238959~"394",  
GeoDist==0.476932273~"395",  
GeoDist==0.56338169~"396",  
GeoDist==0.404574939~"397",  
GeoDist==1.095467305~"398",  
GeoDist==2.971650227~"399",  
GeoDist==0.339631322~"400",  
GeoDist==2.264510024~"401",  
GeoDist==1.610330888~"402",  
GeoDist==0.931653418~"403",  
GeoDist==1.274140329~"404",  
GeoDist==1.764513579~"405",  
GeoDist==0.459780738~"406",  
GeoDist==1.556111351~"407",  
GeoDist==1.592759535~"408",  
GeoDist==2.686022348~"409",  
GeoDist==1.213774786~"410",  
GeoDist==0.991186946~"411",  
GeoDist==0.732303045~"412",  
GeoDist==0.940952619~"413",  
GeoDist==2.319575727~"414",

GeoDist==1.425238011~"415",  
GeoDist==1.918624047~"416",  
GeoDist==0.632997674~"417",  
GeoDist==1.620730737~"418",  
GeoDist==2.696655581~"419",  
GeoDist==0.548628219~"420",  
GeoDist==1.409057727~"421",  
GeoDist==1.443479799~"422",  
GeoDist==2.405855334~"423",  
GeoDist==0.92482297~"424",  
GeoDist==0.892175891~"425",  
GeoDist==0.231793249~"426",  
GeoDist==0.43171364~"427",  
GeoDist==2.431202204~"428",  
GeoDist==2.796938409~"429",  
GeoDist==0.628555469~"430",  
GeoDist==1.514895717~"431",  
GeoDist==1.229152336~"432",  
GeoDist==1.653082016~"433",  
GeoDist==1.854591491~"434",  
GeoDist==0.275733583~"435",  
GeoDist==0.54896562~"436",  
GeoDist==2.3284851~"437",  
GeoDist==2.834788898~"438",  
GeoDist==0.916147737~"439",  
GeoDist==1.121676207~"440",  
GeoDist==1.537375075~"441",  
GeoDist==0.461230244~"442",  
GeoDist==1.120508855~"443",  
GeoDist==1.473976448~"444",  
GeoDist==1.834250206~"445",  
GeoDist==2.320914402~"446",  
GeoDist==1.951094644~"447",  
GeoDist==2.026864604~"448",  
GeoDist==2.613450267~"449",  
GeoDist==0.868677022~"450",  
GeoDist==1.014911736~"451",  
GeoDist==1.014923773~"452",  
GeoDist==1.603826619~"453",  
GeoDist==0.444136563~"454",  
GeoDist==3.722889098~"455",  
GeoDist==0.96970312~"456",  
GeoDist==1.153182792~"457",  
GeoDist==1.062264256~"458",  
GeoDist==0.541554476~"459",  
GeoDist==2.932342473~"460",  
GeoDist==1.218237852~"461",  
GeoDist==1.678410688~"462",

GeoDist==0.29091546~"463",  
GeoDist==0.623306924~"464",  
GeoDist==0.484911034~"465",  
GeoDist==0.9891341~"466",  
GeoDist==1.334174213~"467",  
GeoDist==0.779693468~"468",  
GeoDist==3.401897272~"469",  
GeoDist==2.936304999~"470",  
GeoDist==0.144399979~"471",  
GeoDist==0.846780341~"472",  
GeoDist==0.822499546~"473",  
GeoDist==2.56781213~"474",  
GeoDist==0.756987843~"475",  
GeoDist==1.029505762~"476",  
GeoDist==1.989332733~"477",  
GeoDist==0.743657836~"478",  
GeoDist==0.186563122~"479",  
GeoDist==0.984849232~"480",  
GeoDist==3.752197537~"481",  
GeoDist==1.695681726~"482",  
GeoDist==0.969232002~"483",  
GeoDist==0.862549846~"484",  
GeoDist==1.271097195~"485",  
GeoDist==0.538478673~"486",  
GeoDist==1.21444534~"487",  
GeoDist==0.346626222~"488",  
GeoDist==1.20618611~"489",  
GeoDist==0.180606302~"490",  
GeoDist==0.387749893~"491",  
GeoDist==0.401233338~"492",  
GeoDist==0.931328583~"493",  
GeoDist==1.528854222~"494",  
GeoDist==0.79036764~"495",  
GeoDist==1.37987817~"496",  
GeoDist==2.208418476~"497",  
GeoDist==1.234437778~"498",  
GeoDist==2.001975306~"499",  
GeoDist==1.413548863~"500",  
GeoDist==1.335830289~"501",  
GeoDist==2.057954517~"502",  
GeoDist==0.17157501~"503",  
GeoDist==1.864984694~"504",  
GeoDist==0.748193035~"505",  
GeoDist==2.327284661~"506",  
GeoDist==1.312359991~"507",  
GeoDist==1.570433067~"508",  
GeoDist==0.69760636~"509",  
GeoDist==2.533219087~"510",

GeoDist==0.385004796~"511",  
GeoDist==0.609270374~"512",  
GeoDist==0.740304456~"513",  
GeoDist==1.14069024~"514",  
GeoDist==0.831887407~"515",  
GeoDist==1.872387628~"516",  
GeoDist==0.424326415~"517",  
GeoDist==0.143379302~"518",  
GeoDist==0.412364965~"519",  
GeoDist==0.876551794~"520",  
GeoDist==2.075592877~"521",  
GeoDist==2.667855~"522",  
GeoDist==1.354467982~"523",  
GeoDist==1.33608678~"524",  
GeoDist==1.200017092~"525",  
GeoDist==1.363603097~"526",  
GeoDist==0.000626099~"527",  
GeoDist==0.983490397~"528",  
GeoDist==2.881759218~"529",  
GeoDist==1.148609515~"530",  
GeoDist==1.50776415~"531",  
GeoDist==0.424951379~"532",  
GeoDist==1.896708445~"533",  
GeoDist==0.627431088~"534",  
GeoDist==1.563729516~"535",  
GeoDist==0.900926931~"536",  
GeoDist==2.327191769~"537",  
GeoDist==0.623976559~"538",  
GeoDist==0.549868749~"539",  
GeoDist==2.229122204~"540",  
GeoDist==0.032859519~"541",  
GeoDist==1.547088665~"542",  
GeoDist==1.789869703~"543",  
GeoDist==2.125229511~"544",  
GeoDist==1.337821359~"545",  
GeoDist==1.025074427~"546",  
GeoDist==0.939399681~"547",  
GeoDist==0.335239041~"548",  
GeoDist==1.229189691~"549",  
GeoDist==1.202767834~"550",  
GeoDist==1.068145305~"551",  
GeoDist==2.681025627~"552",  
GeoDist==3.046361466~"553",  
GeoDist==0.811115361~"554",  
GeoDist==1.298772735~"555",  
GeoDist==0.876946435~"556",  
GeoDist==0.507720679~"557",  
GeoDist==0.73161459~"558",



GeoDist==0.083028479~"559",  
GeoDist==1.25259091~"560",  
GeoDist==2.506460142~"561",  
GeoDist==1.20712953~"562",  
GeoDist==2.23822047~"563",  
GeoDist==2.246735954~"564",  
GeoDist==2.23253424~"565",  
GeoDist==1.459076424~"566",  
GeoDist==1.161954331~"567",  
GeoDist==0.899073744~"568",  
GeoDist==1.804806358~"569",  
GeoDist==3.764184863~"570",  
GeoDist==0.391818077~"571",  
GeoDist==1.647061657~"572",  
GeoDist==0.755686683~"573",  
GeoDist==0.293462828~"574",  
GeoDist==2.16949064~"575",  
GeoDist==0.620369135~"576",  
GeoDist==0.75195859~"577",  
GeoDist==1.696954495~"578",  
GeoDist==0.307332707~"579",  
GeoDist==2.15642098~"580",  
GeoDist==1.665888573~"581",  
GeoDist==1.194952137~"582",  
GeoDist==1.456857493~"583",  
GeoDist==1.279934336~"584",  
GeoDist==1.671281825~"585",  
GeoDist==0.187943434~"586",  
GeoDist==0.387752403~"587",  
GeoDist==0.766645657~"588",  
GeoDist==0.51999389~"589",  
GeoDist==1.211960316~"590",  
GeoDist==1.501549324~"591",  
GeoDist==0.474594278~"592",  
GeoDist==0.374567603~"593",  
GeoDist==1.363285257~"594",  
GeoDist==0.41318864~"595",  
GeoDist==1.189772992~"596",  
GeoDist==2.202653281~"597",  
GeoDist==1.045719284~"598",  
GeoDist==0.514740437~"599",  
GeoDist==1.247173828~"600",  
GeoDist==2.132714173~"601",  
GeoDist==0.060437154~"602",  
GeoDist==1.132264019~"603",  
GeoDist==1.043110947~"604",  
GeoDist==2.785176254~"605",  
GeoDist==1.56589945~"606",

GeoDist==2.032020398~"607",  
GeoDist==2.157649944~"608",  
GeoDist==2.410822468~"609",  
GeoDist==1.47915676~"610",  
GeoDist==1.403380562~"611",  
GeoDist==0.703884735~"612",  
GeoDist==0.85963868~"613",  
GeoDist==1.893277137~"614",  
GeoDist==0.85368171~"615",  
GeoDist==1.521751013~"616",  
GeoDist==0.869447387~"617",  
GeoDist==0.742359849~"618",  
GeoDist==1.542830837~"619",  
GeoDist==0.581307141~"620",  
GeoDist==1.983880462~"621",  
GeoDist==1.40745183~"622",  
GeoDist==0.835049024~"623",  
GeoDist==0.866433455~"624",  
GeoDist==1.018877476~"625",  
GeoDist==2.05183139~"626",  
GeoDist==1.480483854~"627",  
GeoDist==0.667170202~"628",  
GeoDist==0.68198234~"629",  
GeoDist==0.410205242~"630",  
GeoDist==0.910597514~"631",  
GeoDist==0.503557709~"632",  
GeoDist==2.124956969~"633",  
GeoDist==1.586060483~"634",  
GeoDist==2.088611987~"635",  
GeoDist==2.247526549~"636",  
GeoDist==3.307348869~"637",  
GeoDist==0.688620099~"638",  
GeoDist==0.560010745~"639",  
GeoDist==3.13260012~"640",  
GeoDist==0.895763989~"641",  
GeoDist==0.34657368~"642",  
GeoDist==2.039471806~"643",  
GeoDist==0.133642958~"644",  
GeoDist==0.744653478~"645",  
GeoDist==0.274564945~"646",  
GeoDist==1.251644424~"647",  
GeoDist==0.900979124~"648",  
GeoDist==0.918648007~"649",  
GeoDist==2.054893319~"650",  
GeoDist==2.247543761~"651",  
GeoDist==0.812270325~"652",  
GeoDist==1.094782485~"653",  
GeoDist==1.093205318~"654",

GeoDist==0.373960895~"655",  
GeoDist==0.151149783~"656",  
GeoDist==1.722290869~"657",  
GeoDist==1.971861251~"658",  
GeoDist==0.919394814~"659",  
GeoDist==0.592241945~"660",  
GeoDist==1.135025435~"661",  
GeoDist==2.259534269~"662",  
GeoDist==0.712181496~"663",  
GeoDist==1.776716236~"664",  
GeoDist==2.326772881~"665",  
GeoDist==1.822934487~"666",  
GeoDist==1.898120557~"667",  
GeoDist==0.770942101~"668",  
GeoDist==0.292243112~"669",  
GeoDist==1.443542543~"670",  
GeoDist==1.171226044~"671",  
GeoDist==0.762496136~"672",  
GeoDist==1.472294581~"673",  
GeoDist==3.57170676~"674",  
GeoDist==2.216942632~"675",  
GeoDist==0.786413197~"676",  
GeoDist==0.383687436~"677",  
GeoDist==0.608869435~"678",  
GeoDist==0.613688084~"679",  
GeoDist==0.980582241~"680",  
GeoDist==1.358378774~"681",  
GeoDist==0.32122307~"682",  
GeoDist==1.438282294~"683",  
GeoDist==2.292547254~"684",  
GeoDist==0.111195641~"685",  
GeoDist==3.043910811~"686",  
GeoDist==1.543103541~"687",  
GeoDist==0.946240645~"688",  
GeoDist==1.134885723~"689",  
GeoDist==1.745365968~"690",  
GeoDist==1.448490185~"691",  
GeoDist==0.8425968~"692",  
GeoDist==0.366227266~"693",  
GeoDist==1.180478642~"694",  
GeoDist==0.624927301~"695",  
GeoDist==0.505322856~"696",  
GeoDist==0.981027393~"697",  
GeoDist==1.652600224~"698",  
GeoDist==0.751950205~"699",  
GeoDist==0.876212619~"700",  
GeoDist==0.771273893~"701",  
GeoDist==1.379875719~"702",

GeoDist==2.678154814~"703",  
GeoDist==1.110895216~"704",  
GeoDist==0.945186226~"705",  
GeoDist==1.47135787~"706",  
GeoDist==1.045055622~"707",  
GeoDist==1.866885537~"708",  
GeoDist==1.34251454~"709",  
GeoDist==1.640458374~"710",  
GeoDist==0.90057068~"711",  
GeoDist==0.956798081~"712",  
GeoDist==0.681375982~"713",  
GeoDist==0.377409325~"714",  
GeoDist==2.680594995~"715",  
GeoDist==1.141120469~"716",  
GeoDist==2.066848808~"717",  
GeoDist==2.099983723~"718",  
GeoDist==0.656120478~"719",  
GeoDist==1.438051753~"720",  
GeoDist==1.022670193~"721",  
GeoDist==0.4311~"722",  
GeoDist==0.679656085~"723",  
GeoDist==1.56050811~"724",  
GeoDist==0.473699992~"725",  
GeoDist==0.497239441~"726",  
GeoDist==2.383647525~"727",  
GeoDist==0.680782818~"728",  
GeoDist==0.341619209~"729",  
GeoDist==2.392134075~"730",  
GeoDist==0.898667097~"731",  
GeoDist==1.488382729~"732",  
GeoDist==0.463631356~"733",  
GeoDist==3.240492136~"734",  
GeoDist==0.684930433~"735",  
GeoDist==0.853700246~"736",  
GeoDist==0.657858174~"737",  
GeoDist==0.730006118~"738",  
GeoDist==2.787954104~"739",  
GeoDist==2.886459929~"740",  
GeoDist==1.132309716~"741",  
GeoDist==0.855190218~"742",  
GeoDist==0.969777832~"743",  
GeoDist==0.078122909~"744",  
GeoDist==1.342621985~"745",  
GeoDist==0.407680362~"746",  
GeoDist==1.031671489~"747",  
GeoDist==0.860914404~"748",  
GeoDist==0.867130971~"749",  
GeoDist==0.168130201~"750",

GeoDist==1.735619627~"751",  
GeoDist==0.418213219~"752",  
GeoDist==1.874808405~"753",  
GeoDist==0.627410109~"754",  
GeoDist==0.519067638~"755",  
GeoDist==1.371982878~"756",  
GeoDist==0.818525548~"757",  
GeoDist==2.618519807~"758",  
GeoDist==1.396076394~"759",  
GeoDist==0.10845097~"760",  
GeoDist==0.998621694~"761",  
GeoDist==1.250962255~"762",  
GeoDist==2.100251691~"763",  
GeoDist==0.362501016~"764",  
GeoDist==1.397579778~"765",  
GeoDist==3.125923628~"766",  
GeoDist==1.600018309~"767",  
GeoDist==0.982540605~"768",  
GeoDist==0.438605052~"769",  
GeoDist==0.566552574~"770",  
GeoDist==1.170443216~"771",  
GeoDist==2.367627211~"772",  
GeoDist==1.542841674~"773",  
GeoDist==1.705642256~"774",  
GeoDist==1.099843883~"775",  
GeoDist==0.791730694~"776",  
GeoDist==2.274324111~"777",  
GeoDist==1.45185097~"778",  
GeoDist==0.73969763~"779",  
GeoDist==1.052263041~"780",  
GeoDist==2.499527587~"781",  
GeoDist==2.379545273~"782",  
GeoDist==0.507780728~"783",  
GeoDist==1.441347134~"784",  
GeoDist==1.294446619~"785",  
GeoDist==0.484359203~"786",  
GeoDist==1.688981804~"787",  
GeoDist==2.186579536~"788",  
GeoDist==1.508496537~"789",  
GeoDist==2.294593005~"790",  
GeoDist==1.079046757~"791",  
GeoDist==0.242808508~"792",  
GeoDist==1.395845837~"793",  
GeoDist==2.730936406~"794",  
GeoDist==0.273275338~"795",  
GeoDist==2.052823403~"796",  
GeoDist==0.033041368~"797",  
GeoDist==0.996597508~"798",

GeoDist==1.557725307~"799",  
GeoDist==0.945320786~"800",  
GeoDist==2.936436151~"801",  
GeoDist==1.646613434~"802",  
GeoDist==1.304459841~"803",  
GeoDist==0.469186449~"804",  
GeoDist==1.74492339~"805",  
GeoDist==0.277959482~"806",  
GeoDist==1.30660578~"807",  
GeoDist==1.019550261~"808",  
GeoDist==1.345795509~"809",  
GeoDist==0.732363793~"810",  
GeoDist==0.745910787~"811",  
GeoDist==2.543755234~"812",  
GeoDist==1.556627321~"813",  
GeoDist==0.589139644~"814",  
GeoDist==0.928862721~"815",  
GeoDist==0.10295182~"816",  
GeoDist==1.266210513~"817",  
GeoDist==1.372419259~"818",  
GeoDist==1.914935889~"819",  
GeoDist==0.633662267~"820",  
GeoDist==1.073230145~"821",  
GeoDist==0.639113392~"822",  
GeoDist==1.47960015~"823",  
GeoDist==0.590695551~"824",  
GeoDist==2.25068455~"825",  
GeoDist==1.247097729~"826",  
GeoDist==1.682059273~"827",  
GeoDist==1.581338684~"828",  
GeoDist==0.793162269~"829",  
GeoDist==1.412359605~"830",  
GeoDist==1.269541037~"831",  
GeoDist==1.429057867~"832",  
GeoDist==1.421734305~"833",  
GeoDist==0.977568721~"834",  
GeoDist==0.461891976~"835",  
GeoDist==1.469029108~"836",  
GeoDist==0.825651761~"837",  
GeoDist==2.533872383~"838",  
GeoDist==1.120920451~"839",  
GeoDist==2.219065174~"840",  
GeoDist==1.557179655~"841",  
GeoDist==0.936407858~"842",  
GeoDist==0.482234183~"843",  
GeoDist==1.134794724~"844",  
GeoDist==2.326367173~"845",  
GeoDist==1.361388278~"846",

GeoDist==0.374226723~"847",  
GeoDist==0.688716043~"848",  
GeoDist==0.336467093~"849",  
GeoDist==0.572229916~"850",  
GeoDist==1.512626554~"851",  
GeoDist==1.255034209~"852",  
GeoDist==1.149014074~"853",  
GeoDist==1.300174716~"854",  
GeoDist==1.462239289~"855",  
GeoDist==2.31310694~"856",  
GeoDist==1.093349844~"857",  
GeoDist==1.363156176~"858",  
GeoDist==0.166063942~"859",  
GeoDist==1.245055694~"860",  
GeoDist==1.169817308~"861",  
GeoDist==0.820404287~"862",  
GeoDist==0.896754051~"863",  
GeoDist==0.711564387~"864",  
GeoDist==1.548211865~"865",  
GeoDist==0.740720122~"866",  
GeoDist==0.709098984~"867",  
GeoDist==1.141707852~"868",  
GeoDist==1.889791076~"869",  
GeoDist==2.662163923~"870",  
GeoDist==0.580020515~"871",  
GeoDist==2.294938058~"872",  
GeoDist==0.708518309~"873",  
GeoDist==0.678007537~"874",  
GeoDist==1.522102842~"875",  
GeoDist==2.48641659~"876",  
GeoDist==1.325191915~"877",  
GeoDist==0.332193305~"878",  
GeoDist==2.237203174~"879",  
GeoDist==1.161776894~"880",  
GeoDist==0.896976154~"881",  
GeoDist==0.236184201~"882",  
GeoDist==1.74107356~"883",  
GeoDist==0.86702929~"884",  
GeoDist==1.212603435~"885",  
GeoDist==1.263216606~"886",  
GeoDist==1.16087469~"887",  
GeoDist==2.443235198~"888",  
GeoDist==0.580688256~"889",  
GeoDist==1.382913362~"890",  
GeoDist==3.079460617~"891",  
GeoDist==1.834483096~"892",  
GeoDist==0.870681213~"893",  
GeoDist==2.710319427~"894",

```

GeoDist==1.759955735~"895",
GeoDist==1.458436809~"896",
GeoDist==1.662256965~"897",
GeoDist==1.739470357~"898",
GeoDist==2.617150285~"899",
GeoDist==2.095194744~"900",
GeoDist==2.560592482~"901",
GeoDist==0.930589481~"902",
GeoDist==1.435236236~"903",
GeoDist==1.434937961~"904",)) -> df

```

```

write.csv(df, file = "200621_copiestest.csv")
#### end ####

```

```

copiesdf<-read.csv("200621_copiestest.csv")
copiesSIM<-copiesdf$SIM
copiesSOR<-copiesdf$SOR
copiesSNE<-copiesdf$SNE
logcopiescopies<-copiesdf$copies
copiesgeo<-copiesdf$GeoDist
copiesID<-copiesdf$contrastID

```

```

mod6<-glmer(copiesSIM~logcopiescopies+(1 | copiesID),
            family=binomial, data=copiesdf, nAGQ = 9, control=glmerControl(optimizer="bobyqa"))#Singular
fit

```

```

summary(mod6)
Anova(mod6, type=(2))
par(mfrow=c(1,2))
plot(residuals(mod6)~fitted(mod6), main="residuals vs fitted")
qqnorm(residuals(mod6))
par(mfrow=c(1,1))

```

```

mod7<-glmer(copiesSOR~logcopiescopies+(1 | copiesID),
            family=binomial, data=copiesdf, nAGQ = 9, control=glmerControl(optimizer="bobyqa"))#Singular
fit

```

```

summary(mod7)
Anova(mod7, type=(2))
par(mfrow=c(1,2))
plot(residuals(mod7)~fitted(mod7), main="residuals vs fitted")
qqnorm(residuals(mod7))
par(mfrow=c(1,1))

```

```

ggplot(, aes(y=copiesSOR, x=logcopiescopies))+
  geom_point(aes(color= ))+
  geom_smooth(method="glm")+
  theme_classic()

```

```

#Average copy number and diversity metric by site comparison
#avgcopies<-aggregate(copiesdf$copies~copiesdf$contrastID, copiesdf, mean)
#avgsim<-aggregate(copiesdf$SIM~copiesdf$contrastID, copiesdf, mean)

```



```

#avgsor<-aggregate(copiesdf$SOR~copiesdf$contrastID, copiesdf, mean)
#avgsne<-aggregate(copiesdf$SNE~copiesdf$contrastID, copiesdf, mean)
#one<-merge(avgsim, avgcopies, by="copiesdf$contrastID")
#two<-merge(avgsor, avgsne, by="copiesdf$contrastID")
#final<-merge(one, two, by="copiesdf$contrastID")
#write.csv(final, file="200729_copiesavg.csv")
finalcopiesdf<-read.csv("200729_copiesavg.csv")

avgsimlme<-finalcopiesdf$SIM
avgcopieslme<-finalcopiesdf$copies
avgsorlme<-finalcopiesdf$SOR
avgsnelme<-finalcopiesdf$SNE

mod10<-glm(avgsimlme~avgcopieslme,family=binomial, data=finalcopiesdf)
summary(mod10)
Anova(mod10)

ggplot(, aes(y=avgsimlme, x=avgcopieslme))+
  geom_point(aes(color= ))+
  geom_smooth(method="glm", method.args=list(family='binomial'))+
  labs(x="Average (log) number of Pd copies per Contrast", y="Average SIM per contrast")+
  theme_classic()

B5 <- glm(avgsnelme~avgcopieslme, family=binomial, data=finalcopiesdf)
summary(B5)
plot(avgsnelme~avgcopieslme, data=finalcopiesdf, type='n', bty="n", xlim=c(0,5),ylim=c(0, 0.1),
xlab="Average (Log) fungal load per Contrast ", ylab="Average SNE")
points(avgcopieslme, avgsnelme, pch=19, cex=0.75, col="black", bg="black")
axis(side=1, lwd=2)
axis(side=2, lwd=2)
title("C", adj=1, line=-26, cex.main=2)

pred <-seq (0,5,0.01)
B5.pred <- predict(B5, list(avgcopieslme=pred), type="response", data=DDRPos)
lines(pred, B5.pred, lty=2, col="blue", lwd=5)
mod11<-glm(avgsorlme~avgcopieslme,family=binomial, data=finalcopiesdf)
summary(mod11)
Anova(mod11)

ggplot(, aes(y=avgsorlme, x=avgcopieslme))+
  geom_point(aes(color= ))+
  geom_smooth(method="glm", method.args=list(family='binomial'))+
  labs(x="Average (log) number of Pd copies per Contrast", y="Average SOR per contrast")+
  theme_classic()

mod12<-glm(avgsnelme~avgcopieslme,family=binomial, data=finalcopiesdf)
summary(mod12)

```

```
Anova(mod12)
```

```
ggplot(, aes(y=avgsnelme, x=avgcopieslme))+  
  geom_point(aes(color= ))+  
  geom_smooth(method="glm", method.args=list(family='binomial'))+  
  labs(x="Average (log) number of Pd copies per Contrast", y="Average SNE per contrast")+  
  theme_classic()
```

```
####end####
```

```
#####
```

```
#Betadiversity-Betadisper full
```

```
#####
```

```
####DataPrep####
```

```
meta<-data[1:23]
```

```
otus<-data[24:23871]
```

```
colSums(data[24:23871])
```

```
colSums(otus)
```

```
i<-(colSums(otus, na.rm=T)!=0)
```

```
otusnonzero<-otus[,i]
```

```
otuzeros<-otus[,!i]
```

```
colSums(otuzeros)
```

```
colSums(otusnonzero)
```

```
oturemovezero<-otusnonzero
```

```
s<-colSums(oturemovezero)
```

```
summary(s)
```

```
#Remove 1s
```

```
colSums(oturemovezero)
```

```
i<-(colSums(oturemovezero, na.rm=T)!=1)
```

```
otusnon1<-oturemovezero[,i]
```

```
otu1<-oturemovezero[,!i]
```

```
colSums(otu1)
```

```
oturemoveones<-otusnon1
```

```
s2<-colSums(oturemoveones)
```

```
summary(s2)
```

```
PAotus<-decostand(x=oturemoveones, method="pa")
```

```
rownames(PAotus)<-data$Group
```

```
pair<-beta.pair(PAotus, index.family="sor")
```

```
SOR<-(pair$beta.sor)
```

```
SIM<-(pair$beta.sim)
```

```
SNE<-(pair$beta.sne)
```

```
pd<-as.factor(data$pd)
```

```
site<-data$site
```

```
year<-data$year
```

```
Eco3<-meta$Level3_Region
```

```
RegionPd<-meta$region_pd
```

```
####end####
```

```

####Betadisper####
betadisper_SOR_pd <-betadisper(SOR, pd, type= c("centroid"), bias.adjust=FALSE, add=FALSE)
plot(betadisper_SOR_pd, axes=c(1,2), cex= 0.7, col = NULL, hull = TRUE, ellipse = FALSE, segments =
TRUE, seg.col = "grey", label = FALSE, label.cex = 1, main= "")
(permutest.betadisper<-permutest(betadisper_SOR_pd, pairwise=FALSE, permutations=999,
parallel=getOption("mc.cores"),))
boxplot(betadisper_SOR_pd)
#Sig Pd larger spread
betadisper_SIM_pd <-betadisper(SIM, pd, type= c("centroid"), bias.adjust=FALSE, add=FALSE)
plot(betadisper_SIM_pd, axes=c(1,2), cex= 0.7, col = NULL, hull = TRUE, ellipse = FALSE, segments =
TRUE, seg.col = "grey", label = FALSE, label.cex = 1, main= "")
(permutest.betadisper<-permutest(betadisper_SIM_pd, pairwise=FALSE, permutations=999,
parallel=getOption("mc.cores"),))
boxplot(betadisper_SIM_pd)
#Non sig
betadisper_SNE_pd <-betadisper(SNE, pd, type= c("centroid"), bias.adjust=FALSE, add=FALSE)
plot(betadisper_SNE_pd, axes=c(1,2), cex= 0.7, col = NULL, hull = TRUE, ellipse = FALSE, segments =
TRUE, seg.col = "grey", label = FALSE, label.cex = 1, main= "")
(permutest.betadisper<-permutest(betadisper_SNE_pd, pairwise=FALSE, permutations=999,
parallel=getOption("mc.cores"),))
boxplot(betadisper_SNE_pd)
#not sig
betadisper_SOR_regionpd <-betadisper(SOR, RegionPd, type= c("centroid"), bias.adjust=FALSE,
add=FALSE)
plot(betadisper_SOR_regionpd, axes=c(1,2), cex= 0.7, col = NULL, hull = TRUE, ellipse = FALSE, segments
= TRUE, seg.col = "grey", label = TRUE, label.cex = 1, main= "")
(permutest.betadisper<-permutest(betadisper_SOR_regionpd, pairwise=FALSE, permutations=999,
parallel=getOption("mc.cores"),))
boxplot(betadisper_SOR_regionpd)
boxplot(betadisper_SOR_regionpd, xlab = "Ecoregion:Pd status", ylab = "Distance to Centroid",
main="SOR")

#Sig
Tukey1<-TukeyHSD(betadisper_SOR_regionpd)
Tukey1
plot(Tukey1)
plot(betadisper_SOR_regionpd$distance~ betadisper_SOR_regionpd$group)
df<-data.frame(cbind(betadisper_SOR_regionpd$group, betadisper_SOR_regionpd$distances))
p<-ggplot(df, aes(x=betadisper_SOR_regionpd$group, y=betadisper_SOR_regionpd$distances))+
  stat_boxplot(geom='errorbar', linetype=1, width=0.5)+
  geom_boxplot()+
  ylim(0.55,0.8)+
  geom_text(x=1, y=0.75, label="A", size=8)+
  geom_text(x=2, y=0.75, label="BC", size=8)+
  geom_text(x=3, y=0.75, label="B", size=8)+
  geom_text(x=4, y=0.75, label="C", size=8)+
  geom_text(x=5, y=0.75, label="C", size=8)+
  geom_text(x=6, y=0.75, label="BC", size=8)+

```

```

xlab("Ecoregion Pd interaction")+
ylab("Distance to Centroid")+
theme_classic()+
ggtitle("Total Beta Diversity")+
theme(plot.title=element_text(size = 30))
p

```

```

betadisper_SIM_regionpd <-betadisper(SIM, RegionPd, type= c("centroid"), bias.adjust=FALSE,
add=FALSE)
plot(betadisper_SIM_regionpd, axes=c(1,2), cex= 0.7, col = NULL, hull = TRUE, ellipse = FALSE, segments
= TRUE, seg.col = "grey", label = FALSE, label.cex = 1, main= "")
(permutest.betadisper<-permutest(betadisper_SIM_regionpd, pairwise=FALSE, permutations=999,
parallel=getOption("mc.cores"),))
boxplot(betadisper_SIM_regionpd)
boxplot(betadisper_SIM_regionpd, xlab = "Ecoregion:Pd status", ylab = "Distance to Centroid",
main="SIM")

```

```

# sig
Tukey2<-TukeyHSD(betadisper_SIM_regionpd)
Tukey2
plot(Tukey2)
df2<-data.frame(cbind(betadisper_SIM_regionpd$group, betadisper_SIM_regionpd$distances))
p<-ggplot(df2, aes(x=betadisper_SIM_regionpd$group, y=betadisper_SIM_regionpd$distances))+
stat_boxplot(geom='errorbar', linetype=1, width=0.5)+
geom_boxplot()+
ylim(0.48,0.8)+
geom_text(x=1, y=0.75, label="A", size=8)+
geom_text(x=2, y=0.75, label="B", size=8)+
geom_text(x=3, y=0.75, label="B", size=8)+
geom_text(x=4, y=0.75, label="B", size=8)+
geom_text(x=5, y=0.75, label="B", size=8)+
geom_text(x=6, y=0.75, label="B", size=8)+
xlab("Ecoregion Pd interaction")+
ylab("Distance to Centroid")+
theme_classic()+
ggtitle("B")+
theme(plot.title=element_text(size = 30))
p

```

```

betadisper_SNE_regionpd <-betadisper(SNE, RegionPd, type= c("centroid"), bias.adjust=FALSE,
add=FALSE)
plot(betadisper_SNE_regionpd, axes=c(1,2), cex= 0.7, col = NULL, hull = TRUE, ellipse = FALSE, segments
= TRUE, seg.col = "grey", label = FALSE, label.cex = 1, main= "")
(permutest.betadisper<-permutest(betadisper_SNE_regionpd, pairwise=FALSE, permutations=999,
parallel=getOption("mc.cores"),))
boxplot(betadisper_SNE_regionpd)

```

```

boxplot(betadisper_SNE_regionpd, xlab = "Ecoregion:Pd status", ylab = "Distance to Centroid",
main="SNE")
Tukey3<-TukeyHSD(betadisper_SNE_regionpd)
Tukey3
plot(Tukey3)
df3<-data.frame(cbind(betadisper_SNE_regionpd$group, betadisper_SNE_regionpd$distances))
p<-ggplot(df2, aes(x=betadisper_SNE_regionpd$group, y=betadisper_SNE_regionpd$distances))+
  stat_boxplot(geom='errorbar', linetype=1, width=0.5)+
  geom_boxplot()+
  ylim(0,0.09)+
  xlab("Ecoregion Pd interaction")+
  ylab("Distance to Centroid")+
  theme_classic()+
  ggtitle("C")+
  theme(plot.title=element_text(size = 30))
p

```

```

betadisper_SIM_Pdregion <-betadisper(SIM, Eco3, type= c("centroid"), bias.adjust=FALSE, add=FALSE)
plot(betadisper_SIM_Pdregion, axes=c(1,2), cex= 0.7, col = NULL, hull = TRUE, ellipse = FALSE, segments
= TRUE, seg.col = "grey", label = FALSE, label.cex = 1, main= "")
(permutest.betadisper<-permutest(betadisper_SIM_Pdregion, pairwise=FALSE, permutations=999,
parallel=getOption("mc.cores"),))
boxplot(betadisper_SIM_Pdregion, main="SIM-PdRegion")
#non sig
betadisper_SOR_Pdregion <-betadisper(SOR, Eco3, type= c("centroid"), bias.adjust=FALSE, add=FALSE)
plot(betadisper_SOR_Pdregion, axes=c(1,2), cex= 0.7, col = NULL, hull = TRUE, ellipse = FALSE, segments
= TRUE, seg.col = "grey", label = FALSE, label.cex = 1, main= "")
(permutest.betadisper<-permutest(betadisper_SOR_Pdregion, pairwise=FALSE, permutations=999,
parallel=getOption("mc.cores"),))
boxplot(betadisper_SOR_Pdregion, main="SOR-PdRegion")
#Non sig
betadisper_SNE_Pdregion <-betadisper(SNE, Eco3, type= c("centroid"), bias.adjust=FALSE, add=FALSE)
plot(betadisper_SNE_Pdregion, axes=c(1,2), cex= 0.7, col = NULL, hull = TRUE, ellipse = FALSE, segments
= TRUE, seg.col = "grey", label = FALSE, label.cex = 1, main= "")
(permutest.betadisper<-permutest(betadisper_SNE_Pdregion, pairwise=FALSE, permutations=999,
parallel=getOption("mc.cores"),))
boxplot(betadisper_SNE_Pdregion, main="SNE-PdRegion")
#Non sig
test<-read.csv("201017_test.csv")
regionI<-test$region_pd
SORdist<-test$SORdist
SIMdist<-test$SIMdist
SNEdist<-test$SNEdist
plot(regionI, SORdist)
p<-ggplot(test, aes(x=regionI, y=SORdist))+
  stat_boxplot(geom='errorbar', linetype=1, width=0.5)+
  geom_boxplot()+
  ylim(0.55,0.8)+

```

```

geom_text(x=1, y=0.75, label="a", size=8)+
geom_text(x=2, y=0.75, label="b", size=8)+
geom_text(x=3, y=0.75, label="bc", size=8)+
geom_text(x=4, y=0.75, label="b", size=8)+
geom_text(x=5, y=0.75, label="c", size=8)+
geom_text(x=6, y=0.75, label="bc", size=8)+
xlab("")+
ylab("Distance to Centroid")+
theme_classic()+
labs(title="Total Beta Diversity", subtitle="A")+
theme(plot.title=element_text(size = 18),plot.subtitle =element_text(size=20, hjust=1))
p
p1<-p+ scale_x_discrete(labels=c("Interior-"="-", "Interior+"="+", "Ridge and Valley -"="-",
                                "Ridge and Valley +"="+", "South West Appalachians -"="-",
                                "South West Appalachians +"="+"))
p1+theme(axis.text.x=element_text(size=20))
p<-ggplot(test, aes(x=regionI, y=SIMdist))+
stat_boxplot(geom='errorbar', linetype=1, width=0.5)+
geom_boxplot()+
ylim(0.48,0.8)+
geom_text(x=1, y=0.75, label="a", size=8)+
geom_text(x=2, y=0.75, label="b", size=8)+
geom_text(x=3, y=0.75, label="b", size=8)+
geom_text(x=4, y=0.75, label="b", size=8)+
geom_text(x=5, y=0.75, label="b", size=8)+
geom_text(x=6, y=0.75, label="b", size=8)+
xlab("")+
ylab("Distance to Centroid")+
theme_classic()+
labs(title="Turnover", subtitle="B")+
theme(plot.title=element_text(size = 18),plot.subtitle=element_text(size=20, hjust=1))
p
p1<-p+ scale_x_discrete(labels=c("Interior-"="-", "Interior+"="+", "Ridge and Valley -"="-",
                                "Ridge and Valley +"="+", "South West Appalachians -"="-",
                                "South West Appalachians +"="+"))
p1+theme(axis.text.x=element_text(size=20))

p<-ggplot(test, aes(x=regionI, y=SNEdist))+
stat_boxplot(geom='errorbar', linetype=1, width=0.5)+
geom_boxplot()+
ylim(0,0.1)+
geom_text(x=1, y=0.75, label="A", size=8)+
geom_text(x=2, y=0.75, label="BC", size=8)+
geom_text(x=3, y=0.75, label="B", size=8)+
geom_text(x=4, y=0.75, label="C", size=8)+
geom_text(x=5, y=0.75, label="C", size=8)+
geom_text(x=6, y=0.75, label="BC", size=8)+

```

```

xlab("Ecoregion P. destructans Interaction")+
ylab("Distance to Centroid")+
theme_classic()+
labs(title="Nestedness", subtitle="C")+
theme(plot.title=element_text(size = 18), plot.subtitle=element_text(size=20, hjust=1),
      axis.text.x=element_text(size=15, margin=margin(t=0, r=10, b=55, l=0)), axis.title.x
=element_text(size=10, face="bold"))
p
p1<-p+ scale_x_discrete(labels=c("Interior-"="-", "Interior+"="+", "Ridge and Valley -"="-",
      "Ridge and Valley +"="+", "South West Appalachians -"="-",
      "South West Appalachians +"="+"))
p1+theme(axis.text.x=element_text(size=20))

####end####
####Adonis####
adonis(SOR~pd*Eco3+year+site, permutations=999, method='bray', strata=site)
#Eco3 year p <0.01 pd p <0.05
adonis(SIM~pd*Eco3+year+site, permutations=999, method='bray', strata=site)
#Pd year p <0.01 eco3 p <0.05
adonis(SNE~pd*Eco3+year+site, permutations=999, method='bray', strata=site)
#No sig

#NMDS pos
positiveEco3<-positive$Level3_Region
skin.nmdspos<-metaMDS(posoturemovezero, distance = "bray", binary=TRUE, k=4, try=20,
trymax=2000)
data.scorespos <- as.data.frame(scores(skin.nmdspos))
data.scorespos
data.scorespos$pd <- rownames(data.scorespos)
data.scorespos$positiveEco3 <- positiveEco3
data.scorespos$region <- positiveEco3
head(data.scorespos)
tail(data.scorespos)
species.scorespos <- as.data.frame(scores(skin.nmdspos, "species"))
species.scorespos$species <- rownames(species.scorespos)
head(species.scorespos)

f1<-ggplot(data=species.scorespos, aes(x=NMDS1, y=NMDS2))+
  geom_point(data=data.scorespos, aes(x=NMDS1, y=NMDS2, colour=positiveEco3, shape=), size=2)+
  scale_color_discrete(name="Ecoregion", labels=c("Interior", "Ridge and Valley", "South West
Appalachians"))+
  labs(colour="Ecoregion")+
  coord_fixed()+
  theme_classic()+
  stat_ellipse(data=data.scorespos, aes(x=NMDS1, y=NMDS2, colour=positiveEco3), type="t", size=1.5,
linetype=1, show.legend = FALSE, level=0.95)
f1

```

```

posInterior<-data.scorespos[data.scorespos$positiveEco3=="Interior",
][chull(data.scorespos[data.scorespos$positiveEco3=="Interior", c("NMDS1", "NMDS2"))], ]

posSW_apps<-data.scorespos[data.scorespos$positiveEco3=="SW_Apps",
][chull(data.scorespos[data.scorespos$positiveEco3=="SW_Apps", c("NMDS1", "NMDS2"))], ]
posRidge_valley<-data.scorespos[data.scorespos$positiveEco3=="Ridge_Valley",
][chull(data.scorespos[data.scorespos$positiveEco3=="Ridge_Valley", c("NMDS1", "NMDS2"))], ]

poshull<-rbind(posInterior, posSW_apps, posRidge_valley)
poshull

f1<-ggplot(data=species.scorespos, aes(x=NMDS1, y=NMDS2))+
  geom_polygon(data=poshull, aes(x=NMDS1, y=NMDS2, colour=positiveEco3, group=positiveEco3),
fill=NA)+
  geom_point(data=data.scorespos, aes(x=NMDS1, y=NMDS2, colour=positiveEco3, shape=positiveEco3),
size=2)+
  scale_color_discrete(name="Ecoregion", labels=c("Interior", "Ridge and Valley", "South West
Appalachians"))+
  labs(colour="Ecoregion")+
  coord_fixed()+
  xlim(-0.4,0.5)+
  ylim(-0.45,0.4)+
  theme_classic()+
  labs(title="Positive Bats", caption="A")+
  theme(plot.title=element_text(size = 25), plot.caption=element_text(size=20), legend.position =
"none")
f1

#NMDS neg
negativeEco3<-negative$Level3_Region
skin.nmds2<-metaMDS(negoturemovezero, distance = "bray", binary=TRUE, k=4, try=20, trymax=2000)
data.scoresneg <- as.data.frame(scores(skin.nmds2))
data.scoresneg
data.scoresneg$group <- rownames(data.scoresneg)
data.scoresneg$negativeEco3 <- negativeEco3
data.scoresneg$region <- negativeEco3
head(data.scoresneg)
tail(data.scoresneg)
species.scoresneg <- as.data.frame(scores(skin.nmds2, "species"))
species.scoresneg$species <- rownames(species.scoresneg)
head(species.scoresneg)

f1<-ggplot(data=species.scoresneg, aes(x=NMDS1, y=NMDS2))+
  geom_point(data=data.scoresneg, aes(x=NMDS1, y=NMDS2, colour=negativeEco3, shape=), size=2)+
  scale_color_discrete(name="Ecoregion", labels=c("Interior", "Ridge and Valley", "South West
Appalachians"))+
  labs(colour="Ecoregion")+

```



```

coord_fixed()+
theme_classic()+
stat_ellipse(data=data.scoresneg, aes(x=NMDS1, y=NMDS2, colour=negativeEco3), type="t", size=1.5,
linetype=1, show.legend = FALSE, level=0.95)
f1

```

```

negInterior<-data.scoresneg[data.scoresneg$negativeEco3=="Interior",
][chull(data.scoresneg[data.scoresneg$negativeEco3=="Interior", c("NMDS1", "NMDS2")]), ]
negSW_apps<-data.scoresneg[data.scoresneg$negativeEco3=="SW_Apps",
][chull(data.scoresneg[data.scoresneg$negativeEco3=="SW_Apps", c("NMDS1", "NMDS2")]), ]
negRidge_valley<-data.scoresneg[data.scoresneg$negativeEco3=="Ridge_Valley",
][chull(data.scoresneg[data.scoresneg$negativeEco3=="Ridge_Valley", c("NMDS1", "NMDS2")]), ]
neghull<-rbind(negInterior, negSW_apps, negRidge_valley)
neghull

```

```

f1<-ggplot(data=species.scoresneg, aes(x=NMDS1, y=NMDS2))+
  geom_polygon(data=neghull, aes(x=NMDS1, y=NMDS2, colour=negativeEco3, group=negativeEco3),
fill=NA)+
  geom_point(data=data.scoresneg, aes(x=NMDS1, y=NMDS2, colour=negativeEco3,
shape=negativeEco3), size=2)+
  scale_color_discrete(name="Ecoregion", labels=c("Interior Plateau", "Ridge and Valley", "South West
Appalachians"))+
  labs(colour="Ecoregion")+
  coord_fixed()+
  xlim(-0.4,0.5)+
  ylim(-0.45,0.4)+
  theme_classic()+
  labs(title="Negative Bats", caption="B")+
  theme(plot.title=element_text(size = 25),plot.caption=element_text(size=20))
f1

```

```

####end####

```

## Supplemental File 1D Metadata

| Group   | Date   | site                   | Level3_Region | pd |
|---------|--------|------------------------|---------------|----|
| CCB277  | 170316 | crumpton_creek_slp     | Interior      | 0  |
| CCB034  | 170104 | fountain               | Interior      | 0  |
| CCB742  | 180108 | hazel_warp             | Interior      | 0  |
| CCB043  | 170105 | mason                  | Interior      | 0  |
| CCB003  | 161220 | ament_cave             | Interior      | 1  |
| CCB769  | 180126 | cane_sink              | Interior      | 1  |
| CCB054  | 170103 | ESPY                   | Interior      | 1  |
| CCB764  | 180126 | cane_sink              | Interior      | 1  |
| CCB254  | 170201 | cripps_mill_cave       | Interior      | 1  |
| CCB1869 | 190109 | ESPY                   | Interior      | 1  |
| CCB858  | 180124 | knob_creek             | Interior      | 1  |
| CCB033  | 170104 | fountain               | Interior      | 1  |
| CCB844  | 180122 | ward_cave              | Interior      | 1  |
| CCB843  | 180122 | ward_cave              | Interior      | 1  |
| CCB856  | 180124 | knob_creek             | Interior      | 1  |
| CCB041  | 170105 | mason                  | Interior      | 1  |
| CCB1870 | 190109 | ESPY                   | Interior      | 1  |
| CCB768  | 180126 | cane_sink              | Interior      | 1  |
| CCB697  | 180118 | mason                  | Interior      | 1  |
| CCB743  | 180108 | hazel_warp             | Interior      | 1  |
| CCB812  | 180131 | leonard_cave           | Interior      | 1  |
| CCB741  | 180108 | hazel_warp             | Interior      | 1  |
| CCB1868 | 190109 | ESPY                   | Interior      | 1  |
| CCB836  | 180119 | aunt_beck_simmons_cave | Interior      | 1  |
| CCB056  | 170103 | ESPY                   | Interior      | 1  |
| CCB851  | 180124 | knob_creek             | Interior      | 1  |
| CCB255  | 170201 | cripps_mill_cave       | Interior      | 1  |
| CCB757  | 180118 | north_spivey_cave      | Interior      | 1  |
| CCB849  | 180122 | ward_cave              | Interior      | 1  |
| CCB692  | 180118 | mason                  | Interior      | 1  |
| CCB053  | 170103 | ESPY                   | Interior      | 1  |
| CCB850  | 180122 | ward_cave              | Interior      | 1  |
| CCB256  | 170201 | cripps_mill_cave       | Interior      | 1  |
| CCB280  | 170316 | crumpton_creek_slp     | Interior      | 1  |
| CCB765  | 180126 | cane_sink              | Interior      | 1  |
| CCB694  | 180118 | mason                  | Interior      | 1  |
| CCB045  | 170105 | mason                  | Interior      | 1  |
| CCB001  | 161220 | ament_cave             | Interior      | 1  |
| CCB848  | 180122 | ward_cave              | Interior      | 1  |
| CCB832  | 180118 | bridgewater_cave       | Interior      | 1  |
| CCB854  | 180124 | knob_creek             | Interior      | 1  |
| CCB831  | 180118 | bridgewater_cave       | Interior      | 1  |
| CCB830  | 180118 | bridgewater_cave       | Interior      | 1  |

|         |        |                           |              |   |
|---------|--------|---------------------------|--------------|---|
| CCB857  | 180124 | knob_creek                | Interior     | 1 |
| CCB853  | 180124 | knob_creek                | Interior     | 1 |
| CCB1723 | 190228 | Trusselcave               | Interior     | 1 |
| CCB1718 | 190227 | wet_cave                  | Interior     | 1 |
| CCB1721 | 190228 | Trusselcave               | Interior     | 1 |
| CCB533  | 180213 | wet_cave                  | Interior     | 1 |
| CCB530  | 180213 | wet_cave                  | Interior     | 1 |
| CCB1717 | 190227 | wet_cave                  | Interior     | 1 |
| CCB1714 | 190227 | wet_cave                  | Interior     | 1 |
| CCB1716 | 190227 | wet_cave                  | Interior     | 1 |
| CCB534  | 180213 | wet_cave                  | Interior     | 1 |
| CCB1722 | 190228 | Trusselcave               | Interior     | 1 |
| CCB605  | 180130 | norris                    | Ridge_Valley | 0 |
| CCB591  | 180126 | blythe_ferry              | Ridge_Valley | 0 |
| CCB1191 | 180313 | cherokee_reservior        | Ridge_Valley | 0 |
| CCB1192 | 180313 | cherokee_reservior        | Ridge_Valley | 0 |
| CCB1988 | 190109 | Hickory_tree_cave         | Ridge_Valley | 0 |
| CCB560  | 180104 | marble_dale_blackman_cave | Ridge_Valley | 0 |
| CCB564  | 180104 | marble_dale_blackman_cave | Ridge_Valley | 0 |
| CCB565  | 180104 | marble_dale_blackman_cave | Ridge_Valley | 0 |
| CCB567  | 180104 | marble_dale_blackman_cave | Ridge_Valley | 0 |
| CCB568  | 180104 | marble_dale_blackman_cave | Ridge_Valley | 0 |
| CCB570  | 180104 | marble_dale_blackman_cave | Ridge_Valley | 0 |
| CCB221  | 170120 | oaks_cave                 | Ridge_Valley | 0 |
| CCB222  | 170120 | oaks_cave                 | Ridge_Valley | 0 |
| CCB574  | 180105 | oaks_cave                 | Ridge_Valley | 0 |
| CCB576  | 180105 | oaks_cave                 | Ridge_Valley | 0 |
| CCB714  | 180112 | river_bluff_sculpture     | Ridge_Valley | 0 |
| CCB715  | 180112 | river_bluff_sculpture     | Ridge_Valley | 0 |
| CCB716  | 180112 | river_bluff_sculpture     | Ridge_Valley | 0 |
| CCB1982 | 190109 | river_bluff_sculpture     | Ridge_Valley | 0 |
| CCB1983 | 190109 | river_bluff_sculpture     | Ridge_Valley | 0 |
| CCB1985 | 190109 | river_bluff_sculpture     | Ridge_Valley | 0 |
| CCB1986 | 190109 | river_bluff_sculpture     | Ridge_Valley | 0 |
| CCB483  | 180201 | indian_grave_point_cave   | Ridge_Valley | 1 |
| CCB1949 | 190115 | norris                    | Ridge_Valley | 1 |
| CCB604  | 180130 | norris                    | Ridge_Valley | 1 |
| CCB1942 | 190115 | norris                    | Ridge_Valley | 1 |
| CCB1947 | 190115 | norris                    | Ridge_Valley | 1 |
| CCB305  | 170123 | norris                    | Ridge_Valley | 1 |
| CCB1950 | 190115 | norris                    | Ridge_Valley | 1 |
| CCB603  | 180130 | norris                    | Ridge_Valley | 1 |
| CCB306  | 170123 | norris                    | Ridge_Valley | 1 |
| CCB1948 | 190115 | norris                    | Ridge_Valley | 1 |
| CCB302  | 170123 | norris                    | Ridge_Valley | 1 |

|         |        |                           |              |   |
|---------|--------|---------------------------|--------------|---|
| CCB310  | 170123 | norris                    | Ridge_Valley | 1 |
| CCB303  | 170123 | norris                    | Ridge_Valley | 1 |
| CCB301  | 170123 | norris                    | Ridge_Valley | 1 |
| CCB307  | 170123 | norris                    | Ridge_Valley | 1 |
| CCB602  | 180130 | norris                    | Ridge_Valley | 1 |
| CCB2013 | 190212 | marble_dale_blackman_cave | Ridge_Valley | 1 |
| CCB2009 | 190212 | marble_dale_blackman_cave | Ridge_Valley | 1 |
| CCB779  | 180227 | marble_bluff              | Ridge_Valley | 1 |
| CCB790  | 180307 | ghost_cave                | Ridge_Valley | 1 |
| CCB789  | 180307 | ghost_cave                | Ridge_Valley | 1 |
| CCB569  | 180104 | marble_dale_blackman_cave | Ridge_Valley | 1 |
| CCB612  | 180131 | eaves                     | Ridge_Valley | 1 |
| CCB335  | 170313 | marble_dale_blackman_cave | Ridge_Valley | 1 |
| CCB562  | 180104 | marble_dale_blackman_cave | Ridge_Valley | 1 |
| CCB1964 | 190213 | marble_bluff              | Ridge_Valley | 1 |
| CCB1677 | 190206 | blythe_ferry              | Ridge_Valley | 1 |
| CCB573  | 180105 | oaks_cave                 | Ridge_Valley | 1 |
| CCB331  | 170313 | marble_dale_blackman_cave | Ridge_Valley | 1 |
| CCB314  | 170131 | marble_bluff              | Ridge_Valley | 1 |
| CCB2007 | 190122 | oaks_cave                 | Ridge_Valley | 1 |
| CCB585  | 180105 | herdocoons                | Ridge_Valley | 1 |
| CCB312  | 170131 | marble_bluff              | Ridge_Valley | 1 |
| CCB613  | 180131 | eaves                     | Ridge_Valley | 1 |
| CCB2010 | 190212 | marble_dale_blackman_cave | Ridge_Valley | 1 |
| CCB379  | 170214 | blythe_ferry              | Ridge_Valley | 1 |
| CCB364  | 170214 | eaves                     | Ridge_Valley | 1 |
| CCB590  | 180126 | blythe_ferry              | Ridge_Valley | 1 |
| CCB2004 | 190122 | oaks_cave                 | Ridge_Valley | 1 |
| CCB584  | 180105 | herdocoons                | Ridge_Valley | 1 |
| CCB586  | 180105 | herdocoons                | Ridge_Valley | 1 |
| CCB333  | 170313 | marble_dale_blackman_cave | Ridge_Valley | 1 |
| CCB592  | 180126 | blythe_ferry              | Ridge_Valley | 1 |
| CCB1674 | 190206 | blythe_ferry              | Ridge_Valley | 1 |
| CCB1969 | 190213 | marble_bluff              | Ridge_Valley | 1 |
| CCB1676 | 190206 | blythe_ferry              | Ridge_Valley | 1 |
| CCB561  | 180104 | marble_dale_blackman_cave | Ridge_Valley | 1 |
| CCB380  | 170214 | blythe_ferry              | Ridge_Valley | 1 |
| CCB785  | 180227 | marble_bluff              | Ridge_Valley | 1 |
| CCB1965 | 190213 | marble_bluff              | Ridge_Valley | 1 |
| CCB610  | 180131 | eaves                     | Ridge_Valley | 1 |
| CCB1662 | 190205 | Hill_cave                 | Ridge_Valley | 1 |
| CCB2011 | 190212 | marble_dale_blackman_cave | Ridge_Valley | 1 |
| CCB782  | 180227 | marble_bluff              | Ridge_Valley | 1 |
| CCB1952 | 190123 | eaves                     | Ridge_Valley | 1 |
| CCB2005 | 190122 | oaks_cave                 | Ridge_Valley | 1 |

|         |        |                           |              |   |
|---------|--------|---------------------------|--------------|---|
| CCB572  | 180105 | oaks_cave                 | Ridge_Valley | 1 |
| CCB1675 | 190206 | blythe_ferry              | Ridge_Valley | 1 |
| CCB611  | 180131 | eaves                     | Ridge_Valley | 1 |
| CCB377  | 170214 | blythe_ferry              | Ridge_Valley | 1 |
| CCB608  | 180131 | eaves                     | Ridge_Valley | 1 |
| CCB607  | 180131 | eaves                     | Ridge_Valley | 1 |
| CCB137  | 170206 | ballplay_cave             | Ridge_Valley | 1 |
| CCB332  | 170313 | marble_dale_blackman_cave | Ridge_Valley | 1 |
| CCB2006 | 190122 | oaks_cave                 | Ridge_Valley | 1 |
| CCB1665 | 190205 | Hill_cave                 | Ridge_Valley | 1 |
| CCB781  | 180227 | marble_bluff              | Ridge_Valley | 1 |
| CCB1957 | 190123 | eaves                     | Ridge_Valley | 1 |
| CCB313  | 170131 | marble_bluff              | Ridge_Valley | 1 |
| CCB787  | 180307 | ghost_cave                | Ridge_Valley | 1 |
| CCB2003 | 190122 | oaks_cave                 | Ridge_Valley | 1 |
| CCB376  | 170214 | blythe_ferry              | Ridge_Valley | 1 |
| CCB1688 | 190212 | ghost_cave                | Ridge_Valley | 1 |
| CCB138  | 170206 | ballplay_cave             | Ridge_Valley | 1 |
| CCB1962 | 190213 | marble_bluff              | Ridge_Valley | 1 |
| CCB1164 | 180315 | meyers_mine               | Ridge_Valley | 1 |
| CCB2012 | 190212 | marble_dale_blackman_cave | Ridge_Valley | 1 |
| CCB1690 | 190212 | ghost_cave                | Ridge_Valley | 1 |
| CCB224  | 170120 | oaks_cave                 | Ridge_Valley | 1 |
| CCB366  | 170214 | eaves                     | Ridge_Valley | 1 |
| CCB783  | 180227 | marble_bluff              | Ridge_Valley | 1 |
| CCB140  | 170206 | ballplay_cave             | Ridge_Valley | 1 |
| CCB315  | 170131 | marble_bluff              | Ridge_Valley | 1 |
| CCB378  | 170214 | blythe_ferry              | Ridge_Valley | 1 |
| CCB1955 | 190123 | eaves                     | Ridge_Valley | 1 |
| CCB606  | 180131 | eaves                     | Ridge_Valley | 1 |
| CCB361  | 170214 | eaves                     | Ridge_Valley | 1 |
| CCB1664 | 190205 | Hill_cave                 | Ridge_Valley | 1 |
| CCB1692 | 190212 | ghost_cave                | Ridge_Valley | 1 |
| CCB363  | 170214 | eaves                     | Ridge_Valley | 1 |
| CCB1686 | 190212 | ghost_cave                | Ridge_Valley | 1 |
| CCB362  | 170214 | eaves                     | Ridge_Valley | 1 |
| CCB334  | 170313 | marble_dale_blackman_cave | Ridge_Valley | 1 |
| CCB1963 | 190213 | marble_bluff              | Ridge_Valley | 1 |
| CCB1666 | 190205 | Hill_cave                 | Ridge_Valley | 1 |
| CCB791  | 180307 | ghost_cave                | Ridge_Valley | 1 |
| CCB244  | 170131 | lost_creek_cave           | SW_Apps      | 0 |
| CCB108  | 180104 | Bone_cave                 | SW_Apps      | 0 |
| CCB750  | 180110 | coriolis                  | SW_Apps      | 0 |
| CCB1995 | 190117 | Drycave                   | SW_Apps      | 0 |
| CCB762  | 180115 | gastens_moonshine_cave    | SW_Apps      | 0 |

|         |        |                 |         |   |
|---------|--------|-----------------|---------|---|
| CCB323  | 170203 | nickajack       | SW_Apps | 0 |
| CCB324  | 170203 | nickajack       | SW_Apps | 0 |
| CCB325  | 170203 | nickajack       | SW_Apps | 0 |
| CCB326  | 170203 | nickajack       | SW_Apps | 0 |
| CCB327  | 170203 | nickajack       | SW_Apps | 0 |
| CCB329  | 170203 | nickajack       | SW_Apps | 0 |
| CCB330  | 170203 | nickajack       | SW_Apps | 0 |
| CCB620  | 180119 | el_abismo       | SW_Apps | 1 |
| CCB242  | 170131 | lost_creek_cave | SW_Apps | 1 |
| CCB621  | 180119 | el_abismo       | SW_Apps | 1 |
| CCB628  | 180129 | calkiller_slp   | SW_Apps | 1 |
| CCB627  | 180119 | el_abismo       | SW_Apps | 1 |
| CCB746  | 180110 | coriolis        | SW_Apps | 1 |
| CCB749  | 180110 | coriolis        | SW_Apps | 1 |
| CCB1993 | 190117 | Drycave         | SW_Apps | 1 |
| CCB1312 | 190124 | signature       | SW_Apps | 1 |
| CCB105  | 171228 | phineasfinncave | SW_Apps | 1 |
| CCB682  | 180109 | keith_cove_cave | SW_Apps | 1 |
| CCB084  | 170303 | carleton        | SW_Apps | 1 |
| CCB1703 | 190226 | Solomonstemple  | SW_Apps | 1 |
| CCB2001 | 190117 | Drycave         | SW_Apps | 1 |
| CCB1603 | 190124 | east_fork_slp   | SW_Apps | 1 |
| CCB1994 | 190117 | Drycave         | SW_Apps | 1 |
| CCB297  | 170320 | signature       | SW_Apps | 1 |
| CCB1604 | 190124 | east_fork_slp   | SW_Apps | 1 |
| CCB1705 | 190226 | Solomonstemple  | SW_Apps | 1 |
| CCB1309 | 190124 | signature       | SW_Apps | 1 |
| CCB701  | 180314 | carleton        | SW_Apps | 1 |
| CCB1602 | 190124 | east_fork_slp   | SW_Apps | 1 |
| CCB1712 | 190227 | Drycave         | SW_Apps | 1 |
| CCB086  | 170303 | carleton        | SW_Apps | 1 |
| CCB295  | 170320 | signature       | SW_Apps | 1 |
| CCB700  | 180314 | carleton        | SW_Apps | 1 |
| CCB2002 | 190117 | Drycave         | SW_Apps | 1 |
| CCB1710 | 190227 | Drycave         | SW_Apps | 1 |
| CCB1706 | 190226 | Solomonstemple  | SW_Apps | 1 |
| CCB129  | 170125 | east_fork_slp   | SW_Apps | 1 |
| CCB082  | 170303 | carleton        | SW_Apps | 1 |
| CCB298  | 170320 | signature       | SW_Apps | 1 |
| CCB1709 | 190227 | Drycave         | SW_Apps | 1 |
| CCB089  | 170303 | carleton        | SW_Apps | 1 |
| CCB698  | 180411 | east_fork_slp   | SW_Apps | 1 |
| CCB1317 | 190313 | carleton        | SW_Apps | 1 |
| CCB088  | 170303 | carleton        | SW_Apps | 1 |
| CCB294  | 170320 | signature       | SW_Apps | 1 |

|         |        |                  |         |   |
|---------|--------|------------------|---------|---|
| CCB081  | 170303 | carleton         | SW_Apps | 1 |
| CCB130  | 170125 | east_fork_slp    | SW_Apps | 1 |
| CCB083  | 170303 | carleton         | SW_Apps | 1 |
| CCB1707 | 190226 | Solomonstemple   | SW_Apps | 1 |
| CCB1319 | 190313 | carleton         | SW_Apps | 1 |
| CCB1711 | 190227 | Drycave          | SW_Apps | 1 |
| CCB1708 | 190227 | Drycave          | SW_Apps | 1 |
| CCB1314 | 190313 | carleton         | SW_Apps | 1 |
| CCB1605 | 190124 | east_fork_slp    | SW_Apps | 1 |
| CCB1316 | 190313 | carleton         | SW_Apps | 1 |
| CCB699  | 180411 | east_fork_slp    | SW_Apps | 1 |
| CCB681  | 180109 | keith_cove_cave  | SW_Apps | 1 |
| CCB1702 | 190226 | Solomonstemple   | SW_Apps | 1 |
| CCB805  | 180411 | east_fork_slp    | SW_Apps | 1 |
| CCB087  | 170303 | carleton         | SW_Apps | 1 |
| CCB803  | 180411 | east_fork_slp    | SW_Apps | 1 |
| CCB1315 | 190313 | carleton         | SW_Apps | 1 |
| CCB1318 | 190313 | carleton         | SW_Apps | 1 |
| CCB328  | 170203 | nickajack        | SW_Apps | 1 |
| CCB771  | 180215 | hole_in_wall     | SW_Apps | 1 |
| CCB074  | 170227 | whiteside        | SW_Apps | 1 |
| CCB076  | 170227 | whiteside        | SW_Apps | 1 |
| CCB773  | 180215 | little_cedar_mtn | SW_Apps | 1 |
| CCB071  | 170227 | whiteside        | SW_Apps | 1 |
| CCB106  | 171228 | phineasfinncave  | SW_Apps | 0 |
| CCB1310 | 190124 | signature        | SW_Apps | 0 |

# Supplemental File 1E Modeling Results

## Indicator taxa and Pd status

Formula: indicatorabund ~ indicatorpd + (1 | indicatorsite)

| <b>AIC</b>                                    | <b>BIC</b>      | <b>logLik</b>     | <b>deviance</b> | <b>df.resid</b>    |
|-----------------------------------------------|-----------------|-------------------|-----------------|--------------------|
| 7089.3                                        | 7099.9          | -3541.7           | 7083.3          | 246                |
| Scaled residuals:                             |                 |                   |                 |                    |
| <b>Min</b>                                    | <b>1Q</b>       | <b>Median</b>     | <b>3Q</b>       | <b>Max</b>         |
| -8.307                                        | -3.574          | -0.701            | 2.385           | 25.139             |
| Random effects:                               |                 |                   |                 |                    |
| <b>Groups</b>                                 | <b>Name</b>     | <b>Variance</b>   | <b>Std.Dev.</b> |                    |
| indicatorsite                                 | (Intercept)     | 0.6389            | 0.7993          |                    |
| Number of obs: 249, groups: indicatorsite, 48 |                 |                   |                 |                    |
| Fixed effects:                                |                 |                   |                 |                    |
|                                               | <b>Estimate</b> | <b>Std. Error</b> | <b>z value</b>  | <b>Pr(&gt; z )</b> |
| (Intercept)                                   | 4.92493         | 0.11967           | 41.16           | <2e-16 ***         |
| indicatorpd                                   | -1.67301        | 0.02663           | -62.84          | <2e-16 ***         |
| Correlation of Fixed Effects:                 |                 |                   |                 |                    |
| (Intr)                                        | indicatorpd     | -0.158            |                 |                    |

Results of GLMM analysis comparing the abundance of *P. destructans* negative indicator taxa between *P. destrctans* negative and postive bats. Indicator taxa are significantly more abundant on *P. destructans* negative bats compared to postive bats.



### Indicator taxa and log transformed copy number

Formula: indicatorcopiesnegabund ~ logcopiesindicatorneg + (1 | indicatorcopiesnegsite)

| <b>AIC</b>                                             | <b>BIC</b>  | <b>logLik</b>   | <b>deviance</b> | <b>df.resid</b>    |
|--------------------------------------------------------|-------------|-----------------|-----------------|--------------------|
| 5667.2                                                 | 5677.3      | -2830.6         | 5661.2          | 206                |
| Scaled residuals:                                      |             |                 |                 |                    |
| <b>Min</b>                                             | <b>1Q</b>   | <b>Median</b>   | <b>3Q</b>       | <b>Max</b>         |
| -8.7142                                                | -3.4131     | -0.6229         | 2.4343          | 24.8495            |
| Random effects:                                        |             |                 |                 |                    |
| <b>Groups</b>                                          | <b>Name</b> | <b>Variance</b> | <b>Std.Dev.</b> |                    |
| indicatorcopiesnegsite                                 | (Intercept) | 0.8475          | 0.9206          |                    |
| Number of obs: 209, groups: indicatorcopiesnegsite, 43 |             |                 |                 |                    |
| Fixed effects:                                         |             |                 |                 |                    |
| <b>Estimate</b>                                        | <b>Std.</b> | <b>Error</b>    | <b>z value</b>  | <b>Pr(&gt; z )</b> |
| (Intercept)                                            | 3.517601    | 0.147386        | 23.87           | <2e-16<br>***      |
| logcopiesindicatorneg                                  | -0.079233   | 0.007349        | -10.78          | <2e-16<br>***      |
| Correlation of Fixed Effects:                          |             |                 |                 |                    |
| (Intr)                                                 |             |                 |                 |                    |
| lgcpsndctrn                                            | -0.212      |                 |                 |                    |

Results of GLMM analysis comparing the abundance of *P. destructans* negative indicator taxa and log transformed fungal load. There is a significant negative relationship between fungal load and indicator abundance.

### SIM distance decay

glm(formula = AvgSIM ~ avgdist \* avgpd, family = binomial)

Deviance Residuals:

| <b>Min</b> | <b>1Q</b> | <b>Median</b> | <b>3Q</b> | <b>Max</b> |
|------------|-----------|---------------|-----------|------------|
| -0.64621   | -0.07054  | 0.0078        | 0.08761   | 0.43755    |

Coefficients:

| <b>Estimate</b> | <b>Std.</b> | <b>Error</b> | <b>z value</b> | <b>Pr(&gt; z )</b> |
|-----------------|-------------|--------------|----------------|--------------------|
| (Intercept)     | 2.34673     | 0.46065      | 5.094          | 3.5e-07 ***        |
| avgdist         | -0.04093    | 0.23091      | -0.177         | 0.859              |
| avgpd1          | 0.19987     | 0.52346      | 0.382          | 0.703              |
| avgdist:avgpd1  | 0.12079     | 0.28889      | 0.418          | 0.676              |

Null deviance: 20.151 on 1109 degrees of freedom

Residual deviance: 18.427 on 1106 degrees of freedom

AIC: 170.4

Results of GLM analysis comparing the turnover component of beta diversity averaged by site contrast and geographic distance between samples. There is a non significant relationship between turnover and geographic distance between samples.

### SOR Distance Decay

glm(formula = AvgSOR ~ avgdist \* avgpd, family = binomial)

Deviance Residuals:

| <b>Min</b> | <b>1Q</b> | <b>Median</b> | <b>3Q</b> | <b>Max</b> |
|------------|-----------|---------------|-----------|------------|
| -0.50989   | -0.06133  | 0.00885       | 0.08196   | 0.3442     |

Coefficients:

|                | <b>Estimate</b> | <b>Std. Error</b> | <b>z value</b> | <b>Pr(&gt; z )</b> |
|----------------|-----------------|-------------------|----------------|--------------------|
| (Intercept)    | 2.88438         | 0.57053           | 5.056          | 4.29e-07 ***       |
| avgdist        | -0.07389        | 0.28024           | -0.264         | 0.792              |
| avgpd1         | 0.1119          | 0.64711           | 0.173          | 0.863              |
| avgdist:avgpd1 | 0.16799         | 0.35302           | 0.476          | 0.634              |

Null deviance: 15.478 on 1109 degrees of freedom

Residual deviance: 14.318 on 1106 degrees of freedom

AIC: 110.9

Results of GLM analysis comparing total beta diversity averaged by site contrast and geographic distance between samples. There is a non significant relationship between total beta diversity and geographic distance between samples.

### SNE distance decay

glm(formula = AvgSNE ~ avgdist \* avgpd, family = binomial)

Deviance Residuals:

| <b>Min</b> | <b>1Q</b> | <b>Median</b> | <b>3Q</b> | <b>Max</b> |
|------------|-----------|---------------|-----------|------------|
| -0.26238   | -0.07817  | -0.014        | 0.04531   | 0.62748    |

Coefficients:

|                | <b>Estimate</b> | <b>Std. Error</b> | <b>z value</b> | <b>Pr(&gt; z )</b> |
|----------------|-----------------|-------------------|----------------|--------------------|
| (Intercept)    | -3.32815        | 0.73337           | -4.538         | 5.68e-06 ***       |
| avgdist        | -0.02315        | 0.38091           | -0.061         | 0.952              |
| avgpd1         | -0.33164        | 0.83942           | -0.395         | 0.693              |
| avgdist:avgpd1 | -0.02499        | 0.47418           | -0.053         | 0.958              |

Null deviance: 13.027 on 1109 degrees of freedom

Residual deviance: 12.464 on 1106 degrees of freedom

AIC: 64.707

Results of GLM analysis comparing the nestedness component of beta diversity averaged by site contrast and geographic distance between samples. There is a non significant relationship between nestedness and geographic distance between samples.

### SIM copies

glm(formula = avgsimlme ~ avgcopieslme, family = binomial, data = finalcopiesdf)

Deviance Residuals:

| Min      | 1Q       | Median  | 3Q      | Max     |
|----------|----------|---------|---------|---------|
| -0.51222 | -0.06772 | 0.00549 | 0.08068 | 0.38425 |

Coefficients:

|              | Estimate | Std. Error | Z value | Pr(> z )    |
|--------------|----------|------------|---------|-------------|
| (Intercept)  | 2.56694  | 0.3336     | 7.695   | 1.42E-14*** |
| avgcopieslme | 0.03613  | 0.14089    | 0.256   | 0.798       |

Null deviance: 13.743 on 932 degrees of freedom

Residual deviance: 13.676 on 931 degrees of freedom

AIC: 131.88

Results of GLM analysis comparing the between site average turnover component of beta diversity and difference in log transformed fungal load between samples. There is a non significant relationship between site average dissimilarity (SIM) and difference in log transformed fungal load.

### SOR copies

glm(formula = avgsorlme ~ avgcopieslme, family = binomial, data = finalcopiesdf)

Deviance Residuals:

| <b>Min</b> | <b>1Q</b> | <b>Median</b> | <b>3Q</b> | <b>Max</b> |
|------------|-----------|---------------|-----------|------------|
| -0.55529   | -0.05877  | 0.00916       | 0.07416   | 0.30793    |

Coefficients:

|              | <b>Estimate</b> | <b>Std. Error</b> | <b>z value</b> | <b>Pr(&gt; z )</b> |
|--------------|-----------------|-------------------|----------------|--------------------|
| (Intercept)  | 3.02283         | 0.41068           | 7.36           | 1.83e-13 ***       |
| avgcopieslme | 0.04115         | 0.17386           | 0.237          | 0.813              |

Null deviance: 11.293 on 932 degrees of freedom

Residual deviance: 11.236 on 931 degrees of freedom

AIC: 85.202

Results of GLM analysis comparing the between site total beta diversity and difference in log transformed fungal load between samples. There is a non significant relationship between site average dissimilarity (SOR) and difference in log transformed fungal load.

### SNE copies

glm(formula = avgsnelme ~ avgcopieslme, family = binomial, data = finalcopiesdf)

Deviance Residuals:

|              | <b>Min</b>      | <b>1Q</b>         | <b>Median</b>  | <b>3Q</b>          | <b>Max</b> |
|--------------|-----------------|-------------------|----------------|--------------------|------------|
|              | -0.22445        | -0.06933          | -0.01229       | 0.04461            | 0.35614    |
|              | <b>Estimate</b> | <b>Std. Error</b> | <b>z value</b> | <b>Pr(&gt; z )</b> |            |
| (Intercept)  | -3.6673         | 0.5463            | -6.714         | 1.9e-11 ***        |            |
| avgcopieslme | -0.0242         | 0.2299            | -0.105         | 0.916              |            |

Null deviance: 8.1731 on 932 degrees of freedom

Residual deviance: 8.1620 on 931 degrees of freedom

AIC: 48.664

Results of GLM analysis comparing the between average nestedness component of beta diversity and difference in log transformed fungal load between samples. There is a non significant relationship between site average dissimilarity (SNE) and difference in log transformed fungal load.

# Supplemental File 1F Compositional Analysis

## Methods

### *Compositional analysis*

In order to address issues associated with the compositional nature of microbiome datasets (Gloor et al. 2017), we followed the pipeline outlined by Gloor et al. (2017) and clr transformed the presubsampled data set with the *compositions* package in R (Van den Boogaart and Tolosana-Delgado 2008). In total the clr transformed OTU × sample matrix had 33 163 OTUs. Once these data have been clr transformed these values can then be used in regression analysis (Van den Boogaart and Tolosana-Delgado 2013). To explore how treating our data as compositional would impact the result of our analysis on the indicator taxa we re-ran the indicator analysis using the *multipatt* function in R package *indicspecies* (version 1.7.8; De Caceres et al. 2020) on presence absence transformed OTU dataset. We then used a generalized linear mixed-effects model (GLMM) with the *glmer* function (package *lme4*; Bates et al. 2020) and assumed a Poisson error structure. We set site as the random effect to account for nested data, and compared the clr-transformed abundance of significant indicator taxa of *P. destructans* negative bats across all samples. Additionally, we compared the amount of *P. destructans* present (number of copies determined through qPCR) to the abundance of indicator taxa using a GLMM assuming a Poisson error structure, with site set as the random effect.

## Results

A total of 728 OTUs were identified as indicator taxa for *P. destructans* negative bats. The group of indicator OTUs for the *P. destructans* negative bats represents the



common taxa occurring across the individual microbial communities that contributed to the nestedness in metacommunity structure. OTUs indicative of *P. destructans* negative bats were significantly more abundant on *P. destructans* negative, relative to *P. destructans* positive bats (GLMM;  $z = -66.92$ ,  $p \leq 0.05$ ; Supplemental Fig. 1A). Additionally, there was a significant negative relationship between log transformed fungal load and indicator taxa abundance (GLMM;  $z = -49.54$ ,  $p \leq 0.05$ ; Supplemental Fig. 1B), with increased fungal load predictive of fewer indicator taxa.

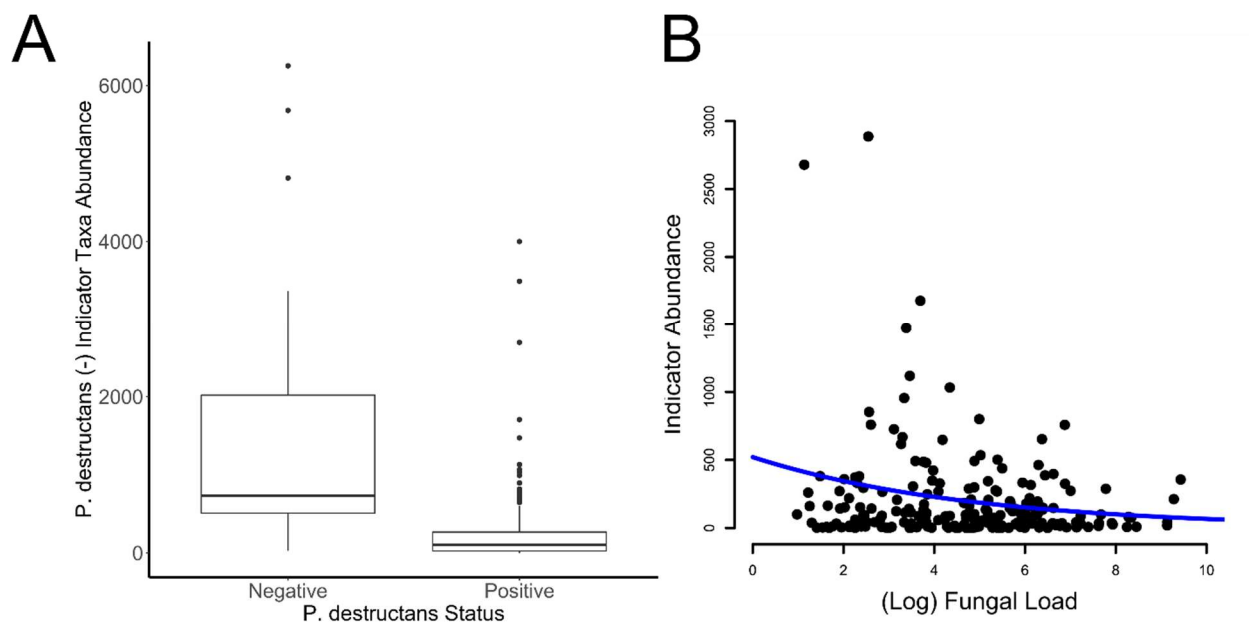

Supplemental Figure 1. A. Comparison of the abundance of *P. destructans* negative indicator taxa between *P. destructans* positive/negative samples. Indicator taxa are significantly more abundant within *P. destructans* negative samples (GLMM;  $z = -66.92$ ,  $p \leq 0.05$ ). B. Comparison of the abundance of *P. destructans* negative indicator taxa by

fungal load. There is a significantly negative relationship between indicator taxa abundance and amount of *P. destructans* present (GLMM;  $z = -49.54$ ,  $p \leq 0.05$ ).

### Literature Cited

De Caceres, M., Jansen, F. & De Caceres, M.M. 'indicspecies'. R package version

1.7.9. <https://CRAN.R-project.org/package=indicspecies> (2020).

Bates, D., Sarkar, D., Bates, M.D. & Matrix, L. The lme4 package. R package version 1-

1.26. <https://CRAN.R-project.org/package=lme4> (2020).

Gloor, G.B., Macklaim, J.M., Pawlowsky-Glahn, V. & Egozcue, J.J. Microbiome datasets

are compositional: and this is not optional. *Front Microbiol.* **8**, 2224;

10.3389/fmicb.2017.02224 (2017).

Van den Boogaart, K.G. & Tolosana-Delgado, R. Compositions: a unified R package to

analyze compositional data. *Comput and Geosci.* **34**, 320-338 (2008).

Van den Boogaart, K.G. & Tolosana-Delgado, R. Analyzing compositional data with R

(Springer International Publishing, 2013).

### R Code

```
library(rcompanion)
library(compositions)
library(indicspecies)
library(dplyr)
library(ggplot2)
library(lme4)

stability<-read.table(file= "stability2.txt", header=TRUE)
metadata<-read.csv(file="PESU_site_5.csv")
data<-merge(metadata,stability, by="Group")
rownames(data)<-data$Group
set.seed(1138)
clr(stability[2:33186])
data<-merge(metadata, stability)
```

```

test<-colSums(data[24:33206])
indicator1<-subset(data, sp=="PESU")
meta<-indicator1[1:23]
indicator1_otus<-indicator1[24:33186]
colSums(indicator1_otus)
i<-(colSums(indicator1_otus, na.rm=T)!=0)
indicator1otusnonzero<-indicator1_otus[,i]
indicator1otuzeros<-indicator1_otus[,!i]
colSums(indicator1otuzeros)
indicator1oturemovezero<-indicator1otusnonzero

```

```

indicator1test<-multipatt(indicator1oturemovezero, indicator1$pd, func="IndVal.g",
control=how(nperm=999))
options(max.print = 10000)
summary(indicator1test)
indicator1<-select(data, "Group", "site", "copies",
"Pd", "text", "Otu000193", "Otu000201", "Otu000728", "Otu003636", "Otu000342", "Otu0028
04", "Otu002334", "Otu000298", "Otu000378", "Otu003219", "Otu001055", "Otu006579", "Ot
u004338", "Otu003811", "Otu002137", "Otu001934", "Otu001058", "Otu000730", "Otu00101
6", "Otu006285", "Otu002000", "Otu006681", "Otu004400", "Otu002066", "Otu005831", "Otu
004475", "Otu001091", "Otu002391", "Otu001537", "Otu001460", "Otu000362", "Otu001473
", "Otu000648", "Otu005788", "Otu001355", "Otu003502", "Otu001568", "Otu005528", "Otu0
06773", "Otu005310", "Otu004537", "Otu002910", "Otu002086", "Otu008100", "Otu019066"
, "Otu004162", "Otu006669", "Otu010716", "Otu001333", "Otu002683", "Otu001551", "Otu00
8888", "Otu003321", "Otu006098", "Otu011427", "Otu006476", "Otu007789", "Otu001012", "
Otu002250", "Otu004100", "Otu010370", "Otu000940", "Otu001876", "Otu003796", "Otu000
722", "Otu003886", "Otu007227", "Otu006380", "Otu005985", "Otu000410", "Otu001527", "
Otu006512", "Otu004822", "Otu002935", "Otu001759", "Otu001376", "Otu000214", "Otu006
940", "Otu001102", "Otu012378", "Otu001304", "Otu001640", "Otu005278", "Otu002685", "
Otu002122", "Otu004713", "Otu002285", "Otu002378", "Otu005249", "Otu010103", "Otu004
693", "Otu001007", "Otu003827", "Otu001449", "Otu002278", "Otu000524", "Otu001644", "
Otu014179", "Otu000941", "Otu000561", "Otu012846", "Otu004546", "Otu012796", "Otu001
638", "Otu022126", "Otu023742", "Otu011269", "Otu003723", "Otu005808", "Otu010807", "
Otu002687", "Otu009559", "Otu004983", "Otu006586", "Otu009035", "Otu006895", "Otu002
110", "Otu011986", "Otu000875", "Otu006101", "Otu016392", "Otu002244", "Otu012904", "
Otu006598", "Otu008994", "Otu012958", "Otu002254", "Otu003610", "Otu006067", "Otu008
626", "Otu002336", "Otu004336", "Otu001235", "Otu006348", "Otu010325", "Otu002811", "
Otu008995", "Otu003258", "Otu003764", "Otu012822", "Otu025700", "Otu025984", "Otu014
004", "Otu016102", "Otu005377", "Otu002270", "Otu017020", "Otu013386", "Otu010733", "
Otu008880", "Otu001878", "Otu007537", "Otu009708", "Otu011648", "Otu003334", "Otu010
472", "Otu011773", "Otu002069", "Otu013570", "Otu003178", "Otu015437", "Otu002934", "
Otu002598", "Otu003075", "Otu001936", "Otu012494", "Otu015743", "Otu009505", "Otu008
301", "Otu005735", "Otu018795", "Otu005354", "Otu015330", "Otu003530", "Otu004588", "
Otu002874", "Otu014090", "Otu004004", "Otu007867", "Otu010937", "Otu012949", "Otu008
664", "Otu006835", "Otu012267", "Otu012700", "Otu024140", "Otu012840", "Otu007563", "

```

Otu003631","Otu017202","Otu001669","Otu002781","Otu003964","Otu010533","Otu019520","Otu024595","Otu026010","Otu014778","Otu011304","Otu005173","Otu002656","Otu002078","Otu004334","Otu003037","Otu012481","Otu005953","Otu007866","Otu016277","Otu012087","Otu012156","Otu009245","Otu012302","Otu012326","Otu014252","Otu016249","Otu021270","Otu001422","Otu006508","Otu013889","Otu003509","Otu013674","Otu011970","Otu016090","Otu009986","Otu000817","Otu012053","Otu004768","Otu003020","Otu013288","Otu015116","Otu008253","Otu003053","Otu003891","Otu013696","Otu017646","Otu020924","Otu011145","Otu011995","Otu012634","Otu012284","Otu018197","Otu000651","Otu002551","Otu002927","Otu004631","Otu004991","Otu005603","Otu006585","Otu008525","Otu009383","Otu009908","Otu009937","Otu013724","Otu013963","Otu014464","Otu017238","Otu019003","Otu019132","Otu020522","Otu021106","Otu021171","Otu021386","Otu022367","Otu022651","Otu024514","Otu024757","Otu025203","Otu025471","Otu026674","Otu028228","Otu028289","Otu004302","Otu004787","Otu005339","Otu003738","Otu013497","Otu006597","Otu005635","Otu002202","Otu008375","Otu017653","Otu004051","Otu007300","Otu014407","Otu005664","Otu012487","Otu019651","Otu010939","Otu002191","Otu007451","Otu003210","Otu017771","Otu025709","Otu026721","Otu027655","Otu017904","Otu005178","Otu003846","Otu002944","Otu003804","Otu016312","Otu017595","Otu005787","Otu005317","Otu017615","Otu021329","Otu025970","Otu027432","Otu030427","Otu001841","Otu013061","Otu011384","Otu018786","Otu003473","Otu001301","Otu003683","Otu016830","Otu024795","Otu025093","Otu008291","Otu002936","Otu004702","Otu003116","Otu019287","Otu013535","Otu025244","Otu018171","Otu011845","Otu010699","Otu012198","Otu015647","Otu031163","Otu031958","Otu004690","Otu014869","Otu004083","Otu011104","Otu018689","Otu008349","Otu020024","Otu003245","Otu010830","Otu002419","Otu022934","Otu023666","Otu026305","Otu028762","Otu030143","Otu010063","Otu012171","Otu004028","Otu014317","Otu020537","Otu000210","Otu005556","Otu017413","Otu008979","Otu008946","Otu007440","Otu016384","Otu016438","Otu016474","Otu017023","Otu018169","Otu020569","Otu022013","Otu022488","Otu026089","Otu006956","Otu002886","Otu007395","Otu004699","Otu015445","Otu016631","Otu006240","Otu008207","Otu012730","Otu014216","Otu014819","Otu009943","Otu010768","Otu005778","Otu022121","Otu025915","Otu026667","Otu012075","Otu012658","Otu008021","Otu001149","Otu012253","Otu009695","Otu012382","Otu014946","Otu020267","Otu031244","Otu003708","Otu002448","Otu017802","Otu018305","Otu004555","Otu015949","Otu019625","Otu020754","Otu024272","Otu028295","Otu029410","Otu010969","Otu015617","Otu005432","Otu005553","Otu008669","Otu019880","Otu021427","Otu023044","Otu023711","Otu024654","Otu004615","Otu011721","Otu016356","Otu014804","Otu001689","Otu009296","Otu013581","Otu013913","Otu013956","Otu014306","Otu016467","Otu017357","Otu018223","Otu018371","Otu019857","Otu019872","Otu021672","Otu021727","Otu022017","Otu024651","Otu024713","Otu025187","Otu025240","Otu025890","Otu026140","Otu026720","Otu030249","Otu030595","Otu030617","Otu032143","Otu032521","Otu006289","Otu005694","Otu003411","Otu002097","Otu003089","Otu007767","Otu003550","Otu009588","Otu018211","Otu014807","Otu002233","Otu006516","Otu020362","Otu026127","Otu030444","Otu009329","Otu010286","Otu022830","Otu001492","Otu005549","Otu006566","Otu004531","Otu019824","Otu003538","Otu018834","Otu005997","Otu003134","Otu003450","Otu003455","Otu003818","Otu004251","Otu004333","Otu004406","Otu004805","Otu004933","Otu005188","Otu005547","Otu005691","Otu006051","Otu006

078","Otu006145","Otu006321","Otu006427","Otu006576","Otu006610","Otu006789","  
Otu006851","Otu007120","Otu007191","Otu007305","Otu007324","Otu007444","Otu007  
510","Otu007528","Otu007547","Otu008285","Otu008584","Otu008668","Otu008716","  
Otu008862","Otu008953","Otu009105","Otu009220","Otu009317","Otu009547","Otu009  
641","Otu009689","Otu009713","Otu009779","Otu009898","Otu010061","Otu010131","  
Otu010270","Otu010332","Otu010366","Otu010567","Otu011401","Otu011610","Otu011  
654","Otu011672","Otu011712","Otu011798","Otu012118","Otu012496","Otu012850","  
Otu013364","Otu013767","Otu013792","Otu014129","Otu014325","Otu014338","Otu014  
507","Otu014654","Otu014673","Otu014709","Otu015165","Otu015522","Otu015723","  
Otu016481","Otu016797","Otu016858","Otu016970","Otu017779","Otu018102","Otu018  
521","Otu018632","Otu018633","Otu019178","Otu019363","Otu019970","Otu020123","  
Otu020405","Otu020439","Otu021217","Otu021248","Otu021546","Otu021574","Otu021  
697","Otu021954","Otu022107","Otu022184","Otu022285","Otu022302","Otu022353","  
Otu022444","Otu022609","Otu023483","Otu023943","Otu024227","Otu024448","Otu024  
456","Otu024491","Otu024647","Otu025394","Otu025430","Otu025995","Otu026226","  
Otu026276","Otu026547","Otu026977","Otu027212","Otu027320","Otu027629","Otu027  
769","Otu028297","Otu029048","Otu029354","Otu029406","Otu029606","Otu029791","  
Otu029820","Otu029994","Otu030251","Otu030930","Otu030981","Otu031259","Otu031  
526","Otu031590","Otu031658","Otu032266","Otu032455","Otu032759","Otu033037","  
Otu033189","Otu033200","Otu033271","Otu033360","Otu033458","Otu033514","Otu033  
578","Otu033768","Otu034127","Otu034250","Otu001514","Otu004234","Otu002414","  
Otu005790","Otu003916","Otu004545","Otu005446","Otu008611","Otu007646","Otu005  
857","Otu008922","Otu002766","Otu008743","Otu003151","Otu002678","Otu006998","  
Otu012677","Otu005434","Otu018198","Otu006378","Otu013395","Otu012858","Otu006  
632","Otu009022","Otu007763","Otu008984","Otu004261","Otu006862","Otu006206","  
Otu016461","Otu009979","Otu007107","Otu003031","Otu005781","Otu009862","Otu016  
751","Otu012616","Otu016987","Otu003950","Otu006638","Otu007047","Otu016017","  
Otu004411","Otu012014","Otu023681","Otu004329","Otu007766","Otu005064","Otu002  
920","Otu003477","Otu009753","Otu005548","Otu006646","Otu017179","Otu021708","  
Otu011992","Otu006117","Otu009504","Otu021275","Otu022380","Otu023163","Otu026  
233","Otu026489","Otu026685","Otu015127","Otu005374","Otu000428","Otu019780","  
Otu029164","Otu030325","Otu030737","Otu003607","Otu015216","Otu004226","Otu002  
670","Otu016585","Otu007778","Otu018362","Otu020276","Otu021218","Otu022326","  
Otu023774","Otu027469","Otu028075","Otu029037","Otu030196","Otu030544","Otu030  
793","Otu030963","Otu031209","Otu031864","Otu032006","Otu032877","Otu033167","  
Otu033336","Otu033698","Otu003894","Otu006736","Otu021934","Otu022799","Otu024  
051","Otu024443","Otu029744","Otu031440","Otu032052","Otu033828","Otu004618","  
Otu006528","Otu020344","Otu006947","Otu006987","Otu009234","Otu017360","Otu017  
528","Otu022165","Otu007097","Otu011086","Otu004163","Otu019844","Otu020798","  
Otu021631","Otu021791","Otu023532","Otu023835","Otu023949","Otu025234","Otu026  
590","Otu028477","Otu031375","Otu013182","Otu018631","Otu002997","Otu001468","  
Otu002131","Otu004434","Otu011662","Otu013246","Otu017846","Otu023341","Otu025  
986","Otu030563","Otu012956","Otu023473","Otu023718","Otu008267","Otu011795","  
Otu014942","Otu014019","Otu004374","Otu015631","Otu018774","Otu019665","Otu019  
904","Otu020898","Otu025144","Otu027395","Otu027692","Otu031655","Otu032239","  
Otu033276","Otu003727","Otu007639","Otu008302","Otu004737","Otu011807","Otu018

```
272", "Otu004598", "Otu023644", "Otu005086", "Otu010403", "Otu025932", "Otu026465", "Otu013410", "Otu019268")
```

```
indicatortext<-indicator1$text
indicatorpd<-indicator1$pd
test<-colSums(indicator1[6:368])
summary(test)#Zero Otus are not found in at least one sample(colSums min=2)
indicatorpd<-indicator1$Pd
indicatorsite<-indicator1$site
rowSums(indicator1[6:368])
indicatorabund<-rowSums(indicator1[6:799])
indicator1PA<-indicator1[6:799]
indicator1PA[indicator1PA > 0] <- 1
PAabund<-rowSums(indicator1PA)
boxplot(indicatorabund~indicatorpd)
plotNormalHistogram(indicatorabund[indicatorpd=="1"])
plotNormalHistogram(indicatorabund[indicatorpd=="0"])

m1<-glmer(indicatorabund~indicatorpd+(1|indicatorsite), family=poisson)
op<-par(mfrow=c(1,2))
qqnorm(resid(m1))#This fit isn't great but still acceptable
qqline(resid(m1))
plot(residuals(m1)~fitted(m1), main="residuals vs fitted")
op<-par(mfrow=c(1,1))
summary(m1)
svg("FigA.svg")
p<-ggplot(indicator1, aes(x=indicatortext, y=indicatorabund, group=text))+
  geom_boxplot()+
  labs(x="P. destructans Status", y="P. destructans (-) Indicator Taxa Abundance")+
  theme(plot.caption = element_text(size=28, face="bold"),
        #panel.border = element_blank(),
        #panel.grid.major = element_blank(),
        #panel.grid.minor=element_blank(),
        panel.background = element_blank(),
        axis.text=element_text(size=17),
        axis.title=element_text(size=18),
        axis.line=element_line(size=1, colour="black"))
p
dev.off()
indicatorcopiesneg<-subset(indicator1, Pd=="1", header=T)
logcopiesindicatorneg<-log(indicatorcopiesneg$copies+1)
indicatorcopiesnegabund<-rowSums(indicatorcopiesneg[6:368])
indicatorcopiesnegsite<-indicatorcopiesneg$site
plot(logcopiesindicatorneg, indicatorcopiesnegabund)
indicatorcopyPA<-indicatorcopiesneg[6:368]
indicatorcopyPA[indicatorcopyPA > 0] <- 1
```

```

copyPAabund<-rowSums(indicatorcopyPA)
plot(copyPAabund~logcopiesindicatorneg)

m4<-glmer(indicatorcopiesnegabund~logcopiesindicatorneg+(1|indicatorcopiesnegsite),
family = poisson)
op<-par(mfrow=c(1,2))
qqnorm(resid(m4))
qqline(resid(m4))
plot(residuals(m4)~fitted(m4), main="residuals vs fitted")
op<-par(mfrow=c(1,1))
summary(m4)

svg("FigB.svg")
B1 <- glm(indicatorcopiesnegabund~logcopiesindicatorneg, family=poisson)
summary(B1)
plot(indicatorcopiesnegabund~logcopiesindicatorneg, type='n', bty="n", xlim=c(0,10),
ylim=c(0,3000),xlab="(Log) Fungal Load", ylab="Indicator Abundance",cex.lab=1.7)
points(logcopiesindicatorneg, indicatorcopiesnegabund, pch=19, cex=1.5, col="black",
bg="black")
axis(side=1, lwd=3)
axis(side=2, lwd=3)
#title("B", adj=1, line=-26, cex.main=2)
pred <-seq (0,10.4,0.01)
B1.pred <- predict(B1, list(logcopiesindicatorneg=pred), type="response",
data=indicatorcopiesnegdata)
lines(pred, B1.pred, lty=1, col="blue", lwd=5)
#tiff("test.tiff", width = 4, height = 4, units = 'in', res = 200)
dev.off()

```

## Supplemental File 1G Betadisper Results

### ***P. destructans* Positive and Negative Bats**

| <b>Ecoregion</b>     | <b>p-value</b> |
|----------------------|----------------|
| Total Beta Diversity | 0.884          |
| Turnover             | 0.97           |
| Nestedness           | 0.603          |

  

| <b><i>P. destructans</i> status</b> | <b>p-value</b> |
|-------------------------------------|----------------|
| Total Beta Diversity                | 0.012*         |
| Turnover                            | 0.175          |
| Nestedness                          | 0.383          |

  

| <b><i>P. destructans</i> status:Ecoregion</b> | <b>p-value</b> |
|-----------------------------------------------|----------------|
| Total Beta Diversity                          | 0.001**        |
| Turnover                                      | 0.001**        |
| Nestedness                                    | 0.511          |

Betadisper analysis comparing beta diversity measured as multivariate dispersion across ecoregions, *P. destructans* status, and interactive effect of *P. destructans* status and ecoregion (*P. destructans* status:Ecoregion). \*\* indicates a significant difference with a p value of 0.001 \* indicates a significant difference with a p value of 0.05. Ecoregion corresponds to EPA ecoregion 3 (specifically Interior Plateau, South West Appalachians, and Ridge and Valley).
