# Supplementary material for: The presence of Pseudogymnoascus destructans, a fungal pathogen of bats, correlates with changes in microbial metacommunity structure
Source: PubMed Central journal article supplement (PMC8175404; doi:10.1038/s41598-021-91118-1), 2021-06-03
Supplement: 41598_2021_91118_MOESM2_ESM.pdf [file 41598_2021_91118_MOESM2_ESM.pdf]

**Title: The presence of a fungal pathogen correlates with changes in microbial metacommunity structure**

Matthew Grisnik<sup>1</sup>, Joshua B Grinath<sup>2</sup>, Donald M Walker<sup>1\*</sup>

<sup>1</sup>Middle Tennessee State University, Department of Biology, Murfreesboro, Tennessee 37132, USA

<sup>2</sup>Idaho State University, Department of Biological Sciences, Pocatello, Idaho 83209, USA

\*Corresponding author

Donald M. Walker, PhD

Donald.Walker@mtsu.edu

615-904-8382

***P. destructans* negative Indicator taxa**

| OTU       | Kingdom  | Phylum         |                             |                             |                             |                                |
|-----------|----------|----------------|-----------------------------|-----------------------------|-----------------------------|--------------------------------|
| Otu002086 | Bacteria | Acidobacteria  | Blastocatellia_             | 11-24_fa                    | 11-24_fa                    | 11-24_ge                       |
| Otu002414 | Bacteria | Acidobacteria  | Blastocatellia_             | 11-24_fa                    | 11-24_fa                    | 11-24_ge                       |
| Otu004546 | Bacteria | Acidobacteria  | Blastocatellia_             | 11-24_fa                    | 11-24_fa                    | 11-24_ge                       |
| Otu005664 | Bacteria | Acidobacteria  | Blastocatellia_             | 11-24_fa                    | 11-24_fa                    | 11-24_ge                       |
| Otu007120 | Bacteria | Acidobacteria  | Blastocatellia_             | 11-24_fa                    | 11-24_fa                    | 11-24_ge                       |
| Otu006638 | Bacteria | Acidobacteria  | Blastocatellia_             | Blastocatellales            | Blastocatellaceae           | Blastocatellaceae_unclassified |
| Otu004234 | Bacteria | Acidobacteria  | Blastocatellia_             | Blastocatellia_unclassified | Blastocatellia_unclassified | Blastocatellia_unclassified    |
| Otu002874 | Bacteria | Acidobacteria  | Blastocatellia_             | DS-100                      | DS-100_fa                   | DS-100_ge                      |
| Otu003031 | Bacteria | Acidobacteria  | FFCH5909                    | FFCH5909_or                 | FFCH5909_fa                 | FFCH5909_ge                    |
| Otu000374 | Bacteria | Acidobacteria  | Blastocatellia_             | Pyrinomonadales             | Pyrinomonadaceae            | RB41                           |
| Otu000722 | Bacteria | Acidobacteria  | Blastocatellia_             | Pyrinomonadales             | Pyrinomonadaceae            | RB41                           |
| Otu001333 | Bacteria | Acidobacteria  | Blastocatellia_             | Pyrinomonadales             | Pyrinomonadaceae            | RB41                           |
| Otu001759 | Bacteria | Acidobacteria  | Blastocatellia_             | Pyrinomonadales             | Pyrinomonadaceae            | RB41                           |
| Otu002378 | Bacteria | Acidobacteria  | Blastocatellia_             | Pyrinomonadales             | Pyrinomonadaceae            | RB41                           |
| Otu004302 | Bacteria | Acidobacteria  | Blastocatellia_             | Pyrinomonadales             | Pyrinomonadaceae            | RB41                           |
| Otu009713 | Bacteria | Acidobacteria  | Blastocatellia_             | Pyrinomonadales             | Pyrinomonadaceae            | RB41                           |
| Otu030143 | Bacteria | Acidobacteria  | Blastocatellia_             | Pyrinomonadales             | Pyrinomonadaceae            | RB41                           |
| Otu008525 | Bacteria | Acidobacteria  | Acidobacteriia              | Solibacterales              | Solibacteraceae_            | Solibacteraceae_unclassified   |
| Otu001040 | Bacteria | Acidobacteria  | Blastocatellia_             | Blastocatellales            | Blastocatellaceae           | Stenotrophobacter              |
| Otu001876 | Bacteria | Acidobacteria  | Thermoanaerobaculia         | Thermoanaerobaculales       | Thermoanaerobaculaceae      | Subgroup_10                    |
| Otu002202 | Bacteria | Acidobacteria  | Acidobacteriia              | Subgroup_13                 | Subgroup_13_fa              | Subgroup_13_ge                 |
| Otu007778 | Bacteria | Acidobacteria  | Subgroup_17                 | Subgroup_17_or              | Subgroup_17_fa              | Subgroup_17_ge                 |
| Otu008668 | Bacteria | Acidobacteria  | Subgroup_22                 | Subgroup_22_or              | Subgroup_22_fa              | Subgroup_22_ge                 |
| Otu001644 | Bacteria | Acidobacteria  | Subgroup_6                  | Subgroup_6_or               | Subgroup_6_fa               | Subgroup_6_ge                  |
| Otu010718 | Bacteria | Acidobacteria  | Subgroup_6                  | Subgroup_6_or               | Subgroup_6_fa               | Subgroup_6_ge                  |
| Otu003727 | Bacteria | Acidobacteria  | Subgroup_6                  | Subgroup_6_unclassified     | Subgroup_6_unclassified     | Subgroup_6_unclassified        |
| Otu004537 | Bacteria | Acidobacteria  | Subgroup_6                  | Subgroup_6_unclassified     | Subgroup_6_unclassified     | Subgroup_6_unclassified        |
| Otu004374 | Bacteria | Acidobacteria  | Acidobacteriia              | Acidobacteriales            | uncultured                  | uncultured_ge                  |
| Otu001186 | Bacteria | Actinobacteria | Thermoleophilia             | Solirubrobacterales         | 67-14                       | 67-14_ge                       |
| Otu002927 | Bacteria | Actinobacteria | Thermoleophilia             | Solirubrobacterales         | 67-14                       | 67-14_ge                       |
| Otu003827 | Bacteria | Actinobacteria | Thermoleophilia             | Solirubrobacterales         | 67-14                       | 67-14_ge                       |
| Otu006280 | Bacteria | Actinobacteria | Thermoleophilia             | Solirubrobacterales         | 67-14                       | 67-14_ge                       |
| Otu001304 | Bacteria | Actinobacteria | Thermoleophilia             | Solirubrobacterales         | 67-14                       | 67-14_ge                       |
| Otu003325 | Bacteria | Actinobacteria | Acidimicrobia               | Acidimicrobia_unclassified  | Acidimicrobia_unclassified  | Acidimicrobia_unclassified     |
| Otu004261 | Bacteria | Actinobacteria | Acidimicrobia               | Acidimicrobia_unclassified  | Acidimicrobia_unclassified  | Acidimicrobia_unclassified     |
| Otu005169 | Bacteria | Actinobacteria | Acidimicrobia               | Acidimicrobia_unclassified  | Acidimicrobia_unclassified  | Acidimicrobia_unclassified     |
| Otu031864 | Bacteria | Actinobacteria | Acidimicrobia               | Acidimicrobia_unclassified  | Acidimicrobia_unclassified  | Acidimicrobia_unclassified     |
| Otu000604 | Bacteria | Actinobacteria | Actinobacteria              | Actinobacteria_unclassified | Actinobacteria_unclassified | Actinobacteria_unclassified    |
| Otu002233 | Bacteria | Actinobacteria | Actinobacteria              | Actinobacteria_unclassified | Actinobacteria_unclassified | Actinobacteria_unclassified    |
| Otu004100 | Bacteria | Actinobacteria | Actinobacteria              | Actinobacteria_unclassified | Actinobacteria_unclassified | Actinobacteria_unclassified    |
| Otu005831 | Bacteria | Actinobacteria | Actinobacteria              | Actinobacteria_unclassified | Actinobacteria_unclassified | Actinobacteria_unclassified    |
| Otu007219 | Bacteria | Actinobacteria | Actinobacteria              | Actinobacteria_unclassified | Actinobacteria_unclassified | Actinobacteria_unclassified    |
| Otu007767 | Bacteria | Actinobacteria | Actinobacteria              | Actinobacteria_unclassified | Actinobacteria_unclassified | Actinobacteria_unclassified    |
| Otu007877 | Bacteria | Actinobacteria | Actinobacteria              | Actinobacteria_unclassified | Actinobacteria_unclassified | Actinobacteria_unclassified    |
| Otu008454 | Bacteria | Actinobacteria | Actinobacteria              | Actinobacteria_unclassified | Actinobacteria_unclassified | Actinobacteria_unclassified    |
| Otu011269 | Bacteria | Actinobacteria | Actinobacteria              | Actinobacteria_unclassified | Actinobacteria_unclassified | Actinobacteria_unclassified    |
| Otu011384 | Bacteria | Actinobacteria | Actinobacteria_unclassified | Actinobacteria_unclassified | Actinobacteria_unclassified | Actinobacteria_unclassified    |

|           |          |                |                 |                             |                             |                                   |
|-----------|----------|----------------|-----------------|-----------------------------|-----------------------------|-----------------------------------|
| Otu025430 | Bacteria | Actinobacteria | Actinobacteria  | Actinobacteria_unclassified | Actinobacteria_unclassified | Actinobacteria_unclassified       |
| Otu000730 | Bacteria | Actinobacteria | Actinobacteria  | Propionibacteriales         | Nocardioideaceae            | Aeromicrobium                     |
| Otu006826 | Bacteria | Actinobacteria | Actinobacteria  | Propionibacteriales         | Nocardioideaceae            | Aeromicrobium                     |
| Otu008303 | Bacteria | Actinobacteria | Actinobacteria  | Propionibacteriales         | Nocardioideaceae            | Aeromicrobium                     |
| Otu004211 | Bacteria | Actinobacteria | Thermoleophilla | Solirubrobacterales         | Solirubrobacteraceae        | Conexibacter                      |
| Otu002185 | Bacteria | Actinobacteria | Thermoleophilla | Solirubrobacterales         | Solirubrobacteraceae        | Conexibacter                      |
| Otu008880 | Bacteria | Actinobacteria | Actinobacteria  | Corynebacteriales           | Corynebacteriaceae          | Corynebacteriaceae_unclassified   |
| Otu004822 | Bacteria | Actinobacteria | Actinobacteria  | Pseudonocardiales           | Pseudonocardiaceae          | Crossiella                        |
| Otu002334 | Bacteria | Actinobacteria | Actinobacteria  | Pseudonocardiales           | Pseudonocardiaceae          | Crossiella                        |
| Otu004631 | Bacteria | Actinobacteria | Actinobacteria  | Pseudonocardiales           | Pseudonocardiaceae          | Crossiella                        |
| Otu002231 | Bacteria | Actinobacteria | Actinobacteria  | Pseudonocardiales           | Pseudonocardiaceae          | Crossiella                        |
| Otu010185 | Bacteria | Actinobacteria | Actinobacteria  | Pseudonocardiales           | Pseudonocardiaceae          | Crossiella                        |
| Otu006625 | Bacteria | Actinobacteria | Actinobacteria  | Propionibacteriales         | Propionibacteriaceae        | Cutibacterium                     |
| Otu002766 | Bacteria | Actinobacteria | Actinobacteria  | Micromonosporales           | Micromonosporaceae          | Dactylosporangium                 |
| Otu000342 | Bacteria | Actinobacteria | Nitriliruptoria | Euzebyales                  | Euzebyaceae                 | Euzebyaceae_unclassified          |
| Otu003731 | Bacteria | Actinobacteria | Nitriliruptoria | Euzebyales                  | Euzebyaceae                 | Euzebyaceae_unclassified          |
| Otu000290 | Bacteria | Actinobacteria | Thermoleophilla | Gaiellales                  | Gaiellaceae                 | Gaiella                           |
| Otu000298 | Bacteria | Actinobacteria | Thermoleophilla | Gaiellales                  | Gaiellaceae                 | Gaiella                           |
| Otu012378 | Bacteria | Actinobacteria | Thermoleophilla | Gaiellales                  | Gaiellaceae                 | Gaiella                           |
| Otu001781 | Bacteria | Actinobacteria | Thermoleophilla | Gaiellales                  | Gaiellaceae                 | Gaiella                           |
| Otu001301 | Bacteria | Actinobacteria | Actinobacteria  | Frankiales                  | Geodermatophilaceae         | Geodermatophilus                  |
| Otu000820 | Bacteria | Actinobacteria | Acidimicrobiia  | IMCC26256                   | IMCC26256_fa                | IMCC26256_ge                      |
| Otu002088 | Bacteria | Actinobacteria | Acidimicrobiia  | IMCC26256                   | IMCC26256_fa                | IMCC26256_ge                      |
| Otu013395 | Bacteria | Actinobacteria | Acidimicrobiia  | IMCC26256                   | IMCC26256_fa                | IMCC26256_ge                      |
| Otu013581 | Bacteria | Actinobacteria | Acidimicrobiia  | IMCC26256                   | IMCC26256_fa                | IMCC26256_ge                      |
| Otu003029 | Bacteria | Actinobacteria | Actinobacteria  | Micrococcales               | Intrasporangiaceae          | Intrasporangiaceae_unclassified   |
| Otu019079 | Bacteria | Actinobacteria | Actinobacteria  | Propionibacteriales         | Nocardioideaceae            | Marmoricola                       |
| Otu001934 | Bacteria | Actinobacteria | Actinobacteria  | Propionibacteriales         | Nocardioideaceae            | Marmoricola                       |
| Otu001616 | Bacteria | Actinobacteria | MB-A2-108       | MB-A2-108_or                | MB-A2-108_fa                | MB-A2-108_ge                      |
| Otu007300 | Bacteria | Actinobacteria | MB-A2-108       | MB-A2-108_or                | MB-A2-108_fa                | MB-A2-108_ge                      |
| Otu007440 | Bacteria | Actinobacteria | MB-A2-108       | MB-A2-108_or                | MB-A2-108_fa                | MB-A2-108_ge                      |
| Otu005377 | Bacteria | Actinobacteria | Actinobacteria  | Micrococcales               | Microbacteriaceae           | Microbacteriaceae_unclassified    |
| Otu003886 | Bacteria | Actinobacteria | Actinobacteria  | Micrococcales               | Microbacteriaceae           | Microbacteriaceae_unclassified    |
| Otu001507 | Bacteria | Actinobacteria | Actinobacteria  | Micromonosporales           | Micromonosporaceae          | Micromonosporaceae_unclassified   |
| Otu004406 | Bacteria | Actinobacteria | Acidimicrobiia  | Microtrichales              | Microtrichales_fa           | Microtrichales_ge                 |
| Otu001016 | Bacteria | Actinobacteria | Actinobacteria  | Corynebacteriales           | Nocardiaceae                | Nocardia                          |
| Otu002137 | Bacteria | Actinobacteria | Actinobacteria  | Corynebacteriales           | Nocardiaceae                | Nocardia                          |
| Otu002110 | Bacteria | Actinobacteria | Actinobacteria  | Propionibacteriales         | Nocardioideaceae            | Nocardioides                      |
| Otu011409 | Bacteria | Actinobacteria | Actinobacteria  | Propionibacteriales         | Propionibacteriales_unclas  | Propionibacteriales_unclassified  |
| Otu006512 | Bacteria | Actinobacteria | Actinobacteria  | Propionibacteriales         | Propionibacteriales_unclas  | Propionibacteriales_unclassified  |
| Otu001007 | Bacteria | Actinobacteria | Actinobacteria  | Pseudonocardiales           | Pseudonocardiaceae          | Pseudonocardia                    |
| Otu001102 | Bacteria | Actinobacteria | Actinobacteria  | Pseudonocardiales           | Pseudonocardiaceae          | Pseudonocardiaceae_unclassified   |
| Otu001390 | Bacteria | Actinobacteria | Actinobacteria  | Pseudonocardiales           | Pseudonocardiaceae          | Pseudonocardiaceae_unclassified   |
| Otu006586 | Bacteria | Actinobacteria | Actinobacteria  | Pseudonocardiales           | Pseudonocardiaceae          | Pseudonocardiaceae_unclassified   |
| Otu018786 | Bacteria | Actinobacteria | Actinobacteria  | Pseudonocardiales           | Pseudonocardiaceae          | Pseudonocardiaceae_unclassified   |
| Otu026010 | Bacteria | Actinobacteria | Actinobacteria  | Pseudonocardiales           | Pseudonocardiaceae          | Pseudonocardiaceae_unclassified   |
| Otu020898 | Bacteria | Actinobacteria | Actinobacteria  | Pseudonocardiales           | Pseudonocardiaceae          | Pseudonocardiaceae_unclassified   |
| Otu002723 | Bacteria | Actinobacteria | Actinobacteria  | Corynebacteriales           | Nocardiaceae                | Rhodococcus                       |
| Otu001449 | Bacteria | Actinobacteria | Rubrobacteria   | Rubrobacterales             | Rubrobacteriaceae           | Rubrobacter                       |
| Otu004336 | Bacteria | Actinobacteria | Rubrobacteria   | Rubrobacterales             | Rubrobacteriaceae           | Rubrobacter                       |
| Otu002244 | Bacteria | Actinobacteria | Thermoleophilla | Solirubrobacterales         | Solirubrobacteraceae        | Solirubrobacteraceae_unclassified |
| Otu001492 | Bacteria | Actinobacteria | Thermoleophilla | Solirubrobacterales         | Solirubrobacteriales_unclas | Solirubrobacteriales_unclassified |
| Otu006862 | Bacteria | Actinobacteria | Thermoleophilla | Solirubrobacterales         | Solirubrobacteriales_unclas | Solirubrobacteriales_unclassified |
| Otu011970 | Bacteria | Actinobacteria | Thermoleophilla | Solirubrobacterales         | Solirubrobacteriales_unclas | Solirubrobacteriales_unclassified |
| Otu003408 | Bacteria | Actinobacteria | Thermoleophilla | Solirubrobacterales         | Solirubrobacteriales_unclas | Solirubrobacteriales_unclassified |
| Otu013963 | Bacteria | Actinobacteria | Thermoleophilla | Solirubrobacterales         | Solirubrobacteriales_unclas | Solirubrobacteriales_unclassified |
| Otu013688 | Bacteria | Actinobacteria | Actinobacteria  | Frankiales                  | Sporichthyaceae             | Sporichthya                       |
| Otu002434 | Bacteria | Actinobacteria | Actinobacteria  | Streptomycetales            | Streptomycetaceae           | Streptomyces                      |

|           |          |                       |                       |                              |                                |                                   |
|-----------|----------|-----------------------|-----------------------|------------------------------|--------------------------------|-----------------------------------|
| Otu016751 | Bacteria | Actinobacteria        | Actinobacteria        | Streptomycetales             | Streptomycetaceae              | Streptomycetaceae_unclassified    |
| Otu007763 | Bacteria | Actinobacteria        | Actinobacteria        | Streptosporangiales          | Streptosporangiaceae           | Streptosporangiaceae_unclassified |
| Otu004983 | Bacteria | Actinobacteria        | Thermoleophilla       | Thermoleophilla_unclassified | Thermoleophilla_unclassified   | Thermoleophilla_unclassified      |
| Otu015954 | Bacteria | Actinobacteria        | Thermoleophilla       | Thermoleophilla_unclassified | Thermoleophilla_unclassified   | Thermoleophilla_unclassified      |
| Otu017462 | Bacteria | Actinobacteria        | Thermoleophilla       | Thermoleophilla_unclassified | Thermoleophilla_unclassified   | Thermoleophilla_unclassified      |
| Otu001058 | Bacteria | Actinobacteria        | Nitriliruptoria       | Euzebyales                   | Euzebyaceae                    | uncultured                        |
| Otu009689 | Bacteria | Actinobacteria        | Nitriliruptoria       | Euzebyales                   | Euzebyaceae                    | uncultured                        |
| Otu000266 | Bacteria | Actinobacteria        | Nitriliruptoria       | Euzebyales                   | Euzebyaceae                    | uncultured                        |
| Otu000823 | Bacteria | Actinobacteria        | Acidimicrobia         | Actinomarinales              | uncultured                     | uncultured_ge                     |
| Otu000941 | Bacteria | Actinobacteria        | Acidimicrobia         | Actinomarinales              | uncultured                     | uncultured_ge                     |
| Otu001568 | Bacteria | Actinobacteria        | Thermoleophilla       | Gaiellales                   | uncultured                     | uncultured_ge                     |
| Otu001878 | Bacteria | Actinobacteria        | Thermoleophilla       | Gaiellales                   | uncultured                     | uncultured_ge                     |
| Otu002892 | Bacteria | Actinobacteria        | Thermoleophilla       | Gaiellales                   | uncultured                     | uncultured_ge                     |
| Otu003846 | Bacteria | Actinobacteria        | Acidimicrobia         | Microtrichales               | uncultured                     | uncultured_ge                     |
| Otu005603 | Bacteria | Actinobacteria        | Thermoleophilla       | Gaiellales                   | uncultured                     | uncultured_ge                     |
| Otu009979 | Bacteria | Actinobacteria        | Acidimicrobia         | Microtrichales               | uncultured                     | uncultured_ge                     |
| Otu001097 | Bacteria | Actinobacteria        | Actinobacteria        | Frankiales                   | uncultured                     | uncultured_ge                     |
| Otu001355 | Bacteria | Actinobacteria        | Acidimicrobia         | Microtrichales               | uncultured                     | uncultured_ge                     |
| Otu005374 | Bacteria | Armatimonadetes       | Chthonomonadetes      | Chthonomonadales             | Chthonomonadales_fa            | Chthonomonadales_ge               |
| Otu007547 | Bacteria | Armatimonadetes       | uncultured            | uncultured_or                | uncultured_fa                  | uncultured_ge                     |
| Otu001012 | Bacteria | Bacteria_unclassified | Bacteria_unclassified | Bacteria_unclassified        | Bacteria_unclassified          | Bacteria_unclassified             |
| Otu001345 | Bacteria | Bacteria_unclassified | Bacteria_unclassified | Bacteria_unclassified        | Bacteria_unclassified          | Bacteria_unclassified             |
| Otu001473 | Bacteria | Bacteria_unclassified | Bacteria_unclassified | Bacteria_unclassified        | Bacteria_unclassified          | Bacteria_unclassified             |
| Otu001527 | Bacteria | Bacteria_unclassified | Bacteria_unclassified | Bacteria_unclassified        | Bacteria_unclassified          | Bacteria_unclassified             |
| Otu002122 | Bacteria | Bacteria_unclassified | Bacteria_unclassified | Bacteria_unclassified        | Bacteria_unclassified          | Bacteria_unclassified             |
| Otu002685 | Bacteria | Bacteria_unclassified | Bacteria_unclassified | Bacteria_unclassified        | Bacteria_unclassified          | Bacteria_unclassified             |
| Otu003550 | Bacteria | Bacteria_unclassified | Bacteria_unclassified | Bacteria_unclassified        | Bacteria_unclassified          | Bacteria_unclassified             |
| Otu003964 | Bacteria | Bacteria_unclassified | Bacteria_unclassified | Bacteria_unclassified        | Bacteria_unclassified          | Bacteria_unclassified             |
| Otu004329 | Bacteria | Bacteria_unclassified | Bacteria_unclassified | Bacteria_unclassified        | Bacteria_unclassified          | Bacteria_unclassified             |
| Otu004737 | Bacteria | Bacteria_unclassified | Bacteria_unclassified | Bacteria_unclassified        | Bacteria_unclassified          | Bacteria_unclassified             |
| Otu005750 | Bacteria | Bacteria_unclassified | Bacteria_unclassified | Bacteria_unclassified        | Bacteria_unclassified          | Bacteria_unclassified             |
| Otu006145 | Bacteria | Bacteria_unclassified | Bacteria_unclassified | Bacteria_unclassified        | Bacteria_unclassified          | Bacteria_unclassified             |
| Otu007451 | Bacteria | Bacteria_unclassified | Bacteria_unclassified | Bacteria_unclassified        | Bacteria_unclassified          | Bacteria_unclassified             |
| Otu007766 | Bacteria | Bacteria_unclassified | Bacteria_unclassified | Bacteria_unclassified        | Bacteria_unclassified          | Bacteria_unclassified             |
| Otu008100 | Bacteria | Bacteria_unclassified | Bacteria_unclassified | Bacteria_unclassified        | Bacteria_unclassified          | Bacteria_unclassified             |
| Otu010472 | Bacteria | Bacteria_unclassified | Bacteria_unclassified | Bacteria_unclassified        | Bacteria_unclassified          | Bacteria_unclassified             |
| Otu011986 | Bacteria | Bacteria_unclassified | Bacteria_unclassified | Bacteria_unclassified        | Bacteria_unclassified          | Bacteria_unclassified             |
| Otu011992 | Bacteria | Bacteria_unclassified | Bacteria_unclassified | Bacteria_unclassified        | Bacteria_unclassified          | Bacteria_unclassified             |
| Otu012267 | Bacteria | Bacteria_unclassified | Bacteria_unclassified | Bacteria_unclassified        | Bacteria_unclassified          | Bacteria_unclassified             |
| Otu012487 | Bacteria | Bacteria_unclassified | Bacteria_unclassified | Bacteria_unclassified        | Bacteria_unclassified          | Bacteria_unclassified             |
| Otu013061 | Bacteria | Bacteria_unclassified | Bacteria_unclassified | Bacteria_unclassified        | Bacteria_unclassified          | Bacteria_unclassified             |
| Otu020522 | Bacteria | Bacteria_unclassified | Bacteria_unclassified | Bacteria_unclassified        | Bacteria_unclassified          | Bacteria_unclassified             |
| Otu020537 | Bacteria | Bacteria_unclassified | Bacteria_unclassified | Bacteria_unclassified        | Bacteria_unclassified          | Bacteria_unclassified             |
| Otu027655 | Bacteria | Bacteria_unclassified | Bacteria_unclassified | Bacteria_unclassified        | Bacteria_unclassified          | Bacteria_unclassified             |
| Otu028075 | Bacteria | Bacteria_unclassified | Bacteria_unclassified | Bacteria_unclassified        | Bacteria_unclassified          | Bacteria_unclassified             |
| Otu028228 | Bacteria | Bacteria_unclassified | Bacteria_unclassified | Bacteria_unclassified        | Bacteria_unclassified          | Bacteria_unclassified             |
| Otu030720 | Bacteria | Bacteria_unclassified | Bacteria_unclassified | Bacteria_unclassified        | Bacteria_unclassified          | Bacteria_unclassified             |
| Otu012677 | Bacteria | Bacteroidetes         | Bacteroidia           | Flavobacteriales             | Flavobacteriaceae              | Flavobacterium                    |
| Otu003455 | Bacteria | Bacteroidetes         | Ignavibacteria        | Ignavibacteriales            | Ignavibacteriales_unclassified | Ignavibacteriales_unclassified    |
| Otu008611 | Bacteria | Bacteroidetes         | Bacteroidia           | Bacteroidales                | Prevotellaceae                 | Prevotella                        |
| Otu003334 | Bacteria | Bacteroidetes         | Rhodothermia          | Rhodothermales               | Rhodothermaceae                | Rhodothermaceae_unclassified      |
| Otu002270 | Bacteria | Bacteroidetes         | Rhodothermia          | Rhodothermales               | Rhodothermaceae                | Rhodothermaceae_unclassified      |
| Otu002069 | Bacteria | Bacteroidetes         | Rhodothermia          | Rhodothermales               | Rhodothermaceae                | Rubrivirga                        |
| Otu003116 | Bacteria | Bacteroidetes         | Rhodothermia          | Rhodothermales               | Rhodothermaceae                | Rubrivirga                        |
| Otu007510 | Bacteria | Bacteroidetes         | Bacteroidia           | Sphingobacteriales           | Sphingobacteriaceae            | Sphingobacteriaceae_unclassified  |
| Otu004043 | Bacteria | Calditrichaeota       | Calditrichia          | Calditrichales               | Calditrichaceae                | JdFR-76                           |
| Otu009908 | Bacteria | Chlamydiae            | Chlamydiae            | Chlamydiales                 | cvE6                           | cvE6_ge                           |
| Otu012496 | Bacteria | Chloroflexi           | Chloroflexia          | Kallotenuales                | AKIW781                        | AKIW781_ge                        |

|           |          |                  |                    |                         |                           |                                |
|-----------|----------|------------------|--------------------|-------------------------|---------------------------|--------------------------------|
| Otu007324 | Bacteria | Chloroflexi      | Chloroflexia       | Thermomicrobiales       | AKYG1722                  | AKYG1722_ge                    |
| Otu001894 | Bacteria | Chloroflexi      | Chloroflexia       | Thermomicrobiales       | AKYG1722                  | AKYG1722_ge                    |
| Otu000193 | Bacteria | Chloroflexi      | Chloroflexia       | Thermomicrobiales       | JG30-KF-CM45              | JG30-KF-CM45_ge                |
| Otu001338 | Bacteria | Chloroflexi      | Chloroflexia       | Thermomicrobiales       | JG30-KF-CM45              | JG30-KF-CM45_ge                |
| Otu016858 | Bacteria | Chloroflexi      | Chloroflexia       | Thermomicrobiales       | JG30-KF-CM45              | JG30-KF-CM45_ge                |
| Otu015437 | Bacteria | Chloroflexi      | Chloroflexia       | Thermomicrobiales       | JG30-KF-CM45              | JG30-KF-CM45_ge                |
| Otu008302 | Bacteria | Chloroflexi      | JG30-KF-CM66       | JG30-KF-CM66_or         | JG30-KF-CM66_fa           | JG30-KF-CM66_ge                |
| Otu000251 | Bacteria | Chloroflexi      | KD4-96             | KD4-96_or               | KD4-96_fa                 | KD4-96_ge                      |
| Otu001551 | Bacteria | Chloroflexi      | KD4-96             | KD4-96_or               | KD4-96_fa                 | KD4-96_ge                      |
| Otu001965 | Bacteria | Chloroflexi      | KD4-96             | KD4-96_or               | KD4-96_fa                 | KD4-96_ge                      |
| Otu007438 | Bacteria | Chloroflexi      | KD4-96             | KD4-96_or               | KD4-96_fa                 | KD4-96_ge                      |
| Otu003818 | Bacteria | Chloroflexi      | Anaerolineae       | RBG-13-54-9             | RBG-13-54-9_fa            | RBG-13-54-9_ge                 |
| Otu009317 | Bacteria | Chloroflexi      | Anaerolineae       | RBG-13-54-9             | RBG-13-54-9_fa            | RBG-13-54-9_ge                 |
| Otu012796 | Bacteria | Chloroflexi      | Anaerolineae       | RBG-13-54-9             | RBG-13-54-9_fa            | RBG-13-54-9_ge                 |
| Otu000453 | Bacteria | Chloroflexi      | Dehalococcoidia    | S085                    | S085_fa                   | S085_ge                        |
| Otu014905 | Bacteria | Chloroflexi      | Dehalococcoidia    | S085                    | S085_fa                   | S085_ge                        |
| Otu004693 | Bacteria | Chloroflexi      | TK10               | TK10_or                 | TK10_fa                   | TK10_ge                        |
| Otu003477 | Bacteria | Chloroflexi      | Anaerolineae       | Anaerolineales          | Anaerolineaceae           | uncultured                     |
| Otu005547 | Bacteria | Chloroflexi      | Anaerolineae       | Anaerolineales          | Anaerolineaceae           | uncultured                     |
| Otu002934 | Bacteria | Chloroflexi      | Anaerolineae       | Ardenticatenales        | uncultured                | uncultured_ge                  |
| Otu018197 | Bacteria | Chloroflexi      | Anaerolineae       | Ardenticatenales        | uncultured                | uncultured_ge                  |
| Otu006508 | Bacteria | Cyanobacteria    | Melainobacteria    | Obscuribacteriales      | Obscuribacteriales_fa     | Obscuribacteriales_ge          |
| Otu011662 | Bacteria | Cyanobacteria    | Melainobacteria    | Obscuribacteriales      | Obscuribacteriales_fa     | Obscuribacteriales_ge          |
| Otu004051 | Bacteria | Dadabacteria     | Dadabacteriia      | Dadabacteriales         | Dadabacteriales_fa        | Dadabacteriales_ge             |
| Otu003728 | Bacteria | Firmicutes       | Bacilli            | Lactobacillales         | Aerococcaceae             | Aerococcus                     |
| Otu003678 | Bacteria | Firmicutes       | Bacilli            | Bacilli_unclassified    | Bacilli_unclassified      | Bacilli_unclassified           |
| Otu006078 | Bacteria | Firmicutes       | Bacilli            | Bacillales              | Paenibacillaceae          | Paenibacillus                  |
| Otu005240 | Bacteria | Firmicutes       | Clostridia         | Clostridiales           | Peptostreptococcaceae     | Romboutsia                     |
| Otu003764 | Bacteria | Gemmatimonadetes | AKAU4049           | AKAU4049_or             | AKAU4049_fa               | AKAU4049_ge                    |
| Otu004531 | Bacteria | Gemmatimonadetes | Gemmatimonadetes   | Gemmatimonadales        | Gemmatimonadaceae         | Gemmatimonadaceae_unclassified |
| Otu017179 | Bacteria | Gemmatimonadetes | Gemmatimonadetes   | Gemmatimonadales        | Gemmatimonadaceae         | Gemmatimonadaceae_unclassified |
| Otu004004 | Bacteria | Gemmatimonadetes | Gemmatimonadetes   | Gemmatimonadales        | Gemmatimonadaceae         | Gemmatimonadaceae_unclassified |
| Otu008285 | Bacteria | Gemmatimonadetes | Gemmatimonadetes   | Gemmatimonadales        | Gemmatimonadaceae         | Gemmatimonas                   |
| Otu016384 | Bacteria | Gemmatimonadetes | Longimicrobia      | Longimicrobiales        | Longimicrobiaceae         | Longimicrobiaceae_ge           |
| Otu000362 | Bacteria | Gemmatimonadetes | Gemmatimonadetes   | Gemmatimonadales        | Gemmatimonadaceae         | uncultured                     |
| Otu003530 | Bacteria | Gemmatimonadetes | Gemmatimonadetes   | Gemmatimonadales        | Gemmatimonadaceae         | uncultured                     |
| Otu012118 | Bacteria | Gemmatimonadetes | Gemmatimonadetes   | Gemmatimonadales        | Gemmatimonadaceae         | uncultured                     |
| Otu009753 | Bacteria | Gemmatimonadetes | Gemmatimonadetes   | Gemmatimonadales        | Gemmatimonadaceae         | uncultured                     |
| Otu001590 | Bacteria | Latescibacteria  | Latescibacteria    | Latescibacteriales      | Latescibacteraceae        | Latescibacteraceae_ge          |
| Otu004702 | Bacteria | Latescibacteria  | Latescibacteria_cl | Latescibacteria_or      | Latescibacteria_fa        | Latescibacteria_ge             |
| Otu004962 | Bacteria | Latescibacteria  | Latescibacteria_cl | Latescibacteria_or      | Latescibacteria_fa        | Latescibacteria_ge             |
| Otu005735 | Bacteria | Latescibacteria  | Latescibacteria_cl | Latescibacteria_or      | Latescibacteria_fa        | Latescibacteria_ge             |
| Otu025394 | Bacteria | Latescibacteria  | Latescibacteria_cl | Latescibacteria_or      | Latescibacteria_fa        | Latescibacteria_ge             |
| Otu000201 | Bacteria | Nitrospirae      | Nitrospira         | Nitrospirales           | Nitrospiraceae            | Nitrospira                     |
| Otu002286 | Bacteria | Nitrospirae      | Nitrospira         | Nitrospirales           | Nitrospiraceae            | Nitrospira                     |
| Otu005354 | Bacteria | Nitrospirae      | Nitrospira         | Nitrospirales           | Nitrospiraceae            | Nitrospira                     |
| Otu006285 | Bacteria | Nitrospirae      | Nitrospira         | Nitrospirales           | Nitrospiraceae            | Nitrospira                     |
| Otu006632 | Bacteria | Nitrospirae      | Nitrospira         | Nitrospirales           | Nitrospiraceae            | Nitrospira                     |
| Otu013386 | Bacteria | Nitrospirae      | Nitrospira         | Nitrospirales           | Nitrospiraceae            | Nitrospira                     |
| Otu021171 | Bacteria | Nitrospirae      | Nitrospira         | Nitrospirales           | Nitrospiraceae            | Nitrospira                     |
| Otu023681 | Bacteria | Nitrospirae      | Nitrospira         | Nitrospirales           | Nitrospiraceae            | Nitrospira                     |
| Otu014507 | Bacteria | Patescibacteria  | Parcubacteria      | Candidatus_Ryanbacteria | Candidatus_Ryanbacteria_l | Candidatus_Ryanbacteria_ge     |
| Otu004713 | Bacteria | Patescibacteria  | Saccharimonadia    | Saccharimonadales       | Saccharimonadales_fa      | Saccharimonadales_ge           |
| Otu009234 | Bacteria | Patescibacteria  | Saccharimonadia    | Saccharimonadales       | Saccharimonadales_unclas  | Saccharimonadales_unclassified |
| Otu011401 | Bacteria | Planctomycetes   | Phycisphaerae      | Phycisphaerales         | Phycisphaeraeaceae        | AKYG587                        |
| Otu002426 | Bacteria | Planctomycetes   | Phycisphaerae      | CCM11a                  | CCM11a_fa                 | CCM11a_ge                      |
| Otu011795 | Bacteria | Planctomycetes   | Phycisphaerae      | CCM11a                  | CCM11a_fa                 | CCM11a_ge                      |
| Otu002479 | Bacteria | Planctomycetes   | Planctomycetacia   | Gemmatales              | Gemmataceae               | Gemmataceae_unclassified       |

|           |          |                |                     |                                  |                                    |                                    |
|-----------|----------|----------------|---------------------|----------------------------------|------------------------------------|------------------------------------|
| Otu014464 | Bacteria | Planctomycetes | Planctomycetacia    | Gemmatales                       | Gemmataceae                        | Gemmataceae_unclassified           |
| Otu002074 | Bacteria | Planctomycetes | Planctomycetacia    | Isosphaerales                    | Isosphaeraeae                      | Isosphaeraeae_unclassified         |
| Otu003654 | Bacteria | Planctomycetes | Phycisphaerae       | mle1-8                           | mle1-8_fa                          | mle1-8_ge                          |
| Otu003894 | Bacteria | Planctomycetes | Phycisphaerae       | mle1-8                           | mle1-8_fa                          | mle1-8_ge                          |
| Otu021934 | Bacteria | Planctomycetes | Phycisphaerae       | mle1-8                           | mle1-8_fa                          | mle1-8_ge                          |
| Otu005446 | Bacteria | Planctomycetes | Phycisphaerae       | Phycisphaerales                  | Phycisphaeraeae                    | Phycisphaeraeae_unclassified       |
| Otu004334 | Bacteria | Planctomycetes | Phycisphaerae       | Phycisphaerae_unclassified       | Phycisphaerae_unclassified         | Phycisphaerae_unclassified         |
| Otu000606 | Bacteria | Planctomycetes | Planctomycetacia    | Pirellulales                     | Pirellulaceae                      | Pir4_lineage                       |
| Otu003538 | Bacteria | Planctomycetes | Planctomycetacia    | Pirellulales                     | Pirellulaceae                      | Pir4_lineage                       |
| Otu002813 | Bacteria | Planctomycetes | Planctomycetacia    | Pirellulales                     | Pirellulaceae                      | Pirellulaceae_unclassified         |
| Otu003104 | Bacteria | Planctomycetes | Pla4_lineage        | Pla4_lineage_or                  | Pla4_lineage_fa                    | Pla4_lineage_ge                    |
| Otu004335 | Bacteria | Planctomycetes | Planctomycetacia    | Planctomycetales                 | Rubinisphaeraeae                   | SH-PL14                            |
| Otu002254 | Bacteria | Planctomycetes | Planctomycetacia    | Pirellulales                     | Pirellulaceae                      | uncultured                         |
| Otu002278 | Bacteria | Planctomycetes | Planctomycetacia    | Gemmatales                       | Gemmataceae                        | uncultured                         |
| Otu002656 | Bacteria | Planctomycetes | Planctomycetacia    | Gemmatales                       | Gemmataceae                        | uncultured                         |
| Otu002678 | Bacteria | Planctomycetes | Planctomycetacia    | Gemmatales                       | Gemmataceae                        | uncultured                         |
| Otu003020 | Bacteria | Planctomycetes | Planctomycetacia    | Pirellulales                     | Pirellulaceae                      | uncultured                         |
| Otu004690 | Bacteria | Planctomycetes | Planctomycetacia    | Gemmatales                       | Gemmataceae                        | uncultured                         |
| Otu004768 | Bacteria | Planctomycetes | Planctomycetacia    | Gemmatales                       | Gemmataceae                        | uncultured                         |
| Otu007538 | Bacteria | Planctomycetes | Planctomycetacia    | Pirellulales                     | Pirellulaceae                      | uncultured                         |
| Otu010332 | Bacteria | Planctomycetes | Planctomycetacia    | Gemmatales                       | Gemmataceae                        | uncultured                         |
| Otu008584 | Bacteria | Planctomycetes | Planctomycetacia    | Planctomycetales                 | Gimesiaceae                        | uncultured                         |
| Otu005432 | Bacteria | Planctomycetes | Planctomycetacia    | Gemmatales                       | Gemmataceae                        | uncultured                         |
| Otu008953 | Bacteria | Planctomycetes | Planctomycetacia    | Gemmatales                       | Gemmataceae                        | uncultured                         |
| Otu002551 | Bacteria | Planctomycetes | Planctomycetacia    | Gemmatales                       | Gemmataceae                        | uncultured                         |
| Otu003053 | Bacteria | Planctomycetes | Planctomycetacia    | Gemmatales                       | Gemmataceae                        | uncultured                         |
| Otu007472 | Bacteria | Planctomycetes | Planctomycetacia    | Gemmatales                       | Gemmataceae                        | uncultured                         |
| Otu006585 | Bacteria | Planctomycetes | Planctomycetacia    | Gemmatales                       | Gemmataceae                        | uncultured                         |
| Otu008984 | Bacteria | Planctomycetes | Planctomycetacia    | Gemmatales                       | Gemmataceae                        | uncultured                         |
| Otu003178 | Bacteria | Planctomycetes | Planctomycetacia    | Planctomycetales                 | uncultured                         | uncultured_ge                      |
| Otu003450 | Bacteria | Planctomycetes | Phycisphaerae       | Tepidisphaerales                 | WD2101_soil_group                  | WD2101_soil_group_ge               |
| Otu001936 | Bacteria | Proteobacteria | Alphaproteobacteria | Rhizobiales                      | A0839                              | A0839_ge                           |
| Otu003916 | Bacteria | Proteobacteria | Alphaproteobacteria | Acetobacterales                  | Acetobacteraceae                   | Acetobacteraceae_unclassified      |
| Otu004163 | Bacteria | Proteobacteria | Alphaproteobacteria | Acetobacterales                  | Acetobacteraceae                   | Acetobacteraceae_unclassified      |
| Otu003210 | Bacteria | Proteobacteria | Alphaproteobacteria | Alphaproteobacteria_unclassified | Alphaproteobacteria_unclassified   | Alphaproteobacteria_unclassified   |
| Otu003245 | Bacteria | Proteobacteria | Alphaproteobacteria | Alphaproteobacteria_unclassified | Alphaproteobacteria_unclassified   | Alphaproteobacteria_unclassified   |
| Otu003134 | Bacteria | Proteobacteria | Alphaproteobacteria | Sphingomonadales                 | Sphingomonadaceae                  | Altererythrobacter                 |
| Otu002265 | Bacteria | Proteobacteria | Alphaproteobacteria | Caulobacterales                  | Parvularculaceae                   | Amphiplicatus                      |
| Otu012494 | Bacteria | Proteobacteria | Gammaproteobacteria | Betaproteobacteriales            | B1-7B5                             | B1-7B5_ge                          |
| Otu001376 | Bacteria | Proteobacteria | Deltaproteobacteria | Myxococcales                     | bacteriap25                        | bacteriap25_ge                     |
| Otu005727 | Bacteria | Proteobacteria | Alphaproteobacteria | Rhizobiales                      | Rhizobiales_Incertae_Sedis         | Bauldia                            |
| Otu003738 | Bacteria | Proteobacteria | Gammaproteobacteria | Betaproteobacteriales            | Betaproteobacteriales_unclassified | Betaproteobacteriales_unclassified |
| Otu012171 | Bacteria | Proteobacteria | Gammaproteobacteria | Betaproteobacteriales            | Betaproteobacteriales_unclassified | Betaproteobacteriales_unclassified |
| Otu009862 | Bacteria | Proteobacteria | Deltaproteobacteria | Myxococcales                     | Bifdi19                            | Bifdi19_ge                         |
| Otu002936 | Bacteria | Proteobacteria | Gammaproteobacteria | Betaproteobacteriales            | Burkholderiaceae                   | Burkholderiaceae_unclassified      |
| Otu012840 | Bacteria | Proteobacteria | Gammaproteobacteria | Betaproteobacteriales            | Burkholderiaceae                   | Burkholderiaceae_unclassified      |
| Otu013497 | Bacteria | Proteobacteria | Gammaproteobacteria | Betaproteobacteriales            | Burkholderiaceae                   | Burkholderiaceae_unclassified      |
| Otu016062 | Bacteria | Proteobacteria | Gammaproteobacteria | Betaproteobacteriales            | Burkholderiaceae                   | Burkholderiaceae_unclassified      |
| Otu024140 | Bacteria | Proteobacteria | Gammaproteobacteria | Betaproteobacteriales            | Burkholderiaceae                   | Burkholderiaceae_unclassified      |
| Otu021727 | Bacteria | Proteobacteria | Gammaproteobacteria | Betaproteobacteriales            | Burkholderiaceae                   | Burkholderiaceae_unclassified      |
| Otu006380 | Bacteria | Proteobacteria | Alphaproteobacteria | Caulobacterales                  | Caulobacteraceae                   | Caulobacteraceae_unclassified      |
| Otu007867 | Bacteria | Proteobacteria | Alphaproteobacteria | Caulobacterales                  | Caulobacteraceae                   | Caulobacteraceae_unclassified      |
| Otu009022 | Bacteria | Proteobacteria | Gammaproteobacteria | CCM19a                           | CCM19a_fa                          | CCM19a_ge                          |
| Otu000836 | Bacteria | Proteobacteria | Deltaproteobacteria | Deltaproteobacteria_unclassified | Deltaproteobacteria_unclassified   | Deltaproteobacteria_unclassified   |
| Otu001640 | Bacteria | Proteobacteria | Deltaproteobacteria | Deltaproteobacteria_unclassified | Deltaproteobacteria_unclassified   | Deltaproteobacteria_unclassified   |
| Otu008979 | Bacteria | Proteobacteria | Deltaproteobacteria | Deltaproteobacteria_unclassified | Deltaproteobacteria_unclassified   | Deltaproteobacteria_unclassified   |
| Otu033768 | Bacteria | Proteobacteria | Deltaproteobacteria | Deltaproteobacteria_unclassified | Deltaproteobacteria_unclassified   | Deltaproteobacteria_unclassified   |
| Otu001460 | Bacteria | Proteobacteria | Alphaproteobacteria | Sphingomonadales                 | Sphingomonadaceae                  | Ellin6055                          |

|           |          |                |                           |                            |                             |                                         |
|-----------|----------|----------------|---------------------------|----------------------------|-----------------------------|-----------------------------------------|
| Otu002926 | Bacteria | Proteobacteria | Gammaproteobacteria       | Enterobacteriales          | Enterobacteriaceae          | Enterobacteriaceae_unclassified         |
| Otu003074 | Bacteria | Proteobacteria | Gammaproteobacteria       | Enterobacteriales          | Enterobacteriaceae          | Enterobacteriaceae_unclassified         |
| Otu006773 | Bacteria | Proteobacteria | Gammaproteobacteria       | Enterobacteriales          | Enterobacteriaceae          | Enterobacteriaceae_unclassified         |
| Otu010106 | Bacteria | Proteobacteria | Gammaproteobacteria       | Enterobacteriales          | Enterobacteriaceae          | Enterobacteriaceae_unclassified         |
| Otu013536 | Bacteria | Proteobacteria | Gammaproteobacteria       | Enterobacteriales          | Enterobacteriaceae          | Enterobacteriaceae_unclassified         |
| Otu013618 | Bacteria | Proteobacteria | Gammaproteobacteria       | Enterobacteriales          | Enterobacteriaceae          | Enterobacteriaceae_unclassified         |
| Otu019713 | Bacteria | Proteobacteria | Gammaproteobacteria       | Enterobacteriales          | Enterobacteriaceae          | Enterobacteriaceae_unclassified         |
| Otu020311 | Bacteria | Proteobacteria | Gammaproteobacteria       | Enterobacteriales          | Enterobacteriaceae          | Enterobacteriaceae_unclassified         |
| Otu020381 | Bacteria | Proteobacteria | Gammaproteobacteria       | Enterobacteriales          | Enterobacteriaceae          | Enterobacteriaceae_unclassified         |
| Otu021286 | Bacteria | Proteobacteria | Gammaproteobacteria       | Enterobacteriales          | Enterobacteriaceae          | Enterobacteriaceae_unclassified         |
| Otu033370 | Bacteria | Proteobacteria | Gammaproteobacteria       | Enterobacteriales          | Enterobacteriaceae          | Enterobacteriaceae_unclassified         |
| Otu023417 | Bacteria | Proteobacteria | Gammaproteobacteria       | Enterobacteriales          | Enterobacteriaceae          | Enterobacteriaceae_unclassified         |
| Otu003320 | Bacteria | Proteobacteria | Gammaproteobacteria       | Enterobacteriales          | Enterobacteriaceae          | Enterobacteriaceae_unclassified         |
| Otu019890 | Bacteria | Proteobacteria | Gammaproteobacteria       | Enterobacteriales          | Enterobacteriaceae          | Escherichia-Shigella                    |
| Otu030657 | Bacteria | Proteobacteria | Gammaproteobacteria       | Enterobacteriales          | Enterobacteriaceae          | Escherichia-Shigella                    |
| Otu000310 | Bacteria | Proteobacteria | Gammaproteobacteria       | Gammaproteobacteria_un     | Gammaproteobacteria_unc     | Gammaproteobacteria_unclassified        |
| Otu000524 | Bacteria | Proteobacteria | Gammaproteobacteria       | Gammaproteobacteria_un     | Gammaproteobacteria_unc     | Gammaproteobacteria_unclassified        |
| Otu001150 | Bacteria | Proteobacteria | Gammaproteobacteria       | Gammaproteobacteria_un     | Gammaproteobacteria_unc     | Gammaproteobacteria_unclassified        |
| Otu002191 | Bacteria | Proteobacteria | Gammaproteobacteria       | Gammaproteobacteria_un     | Gammaproteobacteria_unc     | Gammaproteobacteria_unclassified        |
| Otu006579 | Bacteria | Proteobacteria | Gammaproteobacteria       | Gammaproteobacteria_un     | Gammaproteobacteria_unc     | Gammaproteobacteria_unclassified        |
| Otu006940 | Bacteria | Proteobacteria | Gammaproteobacteria       | Gammaproteobacteria_un     | Gammaproteobacteria_unc     | Gammaproteobacteria_unclassified        |
| Otu007571 | Bacteria | Proteobacteria | Gammaproteobacteria       | Gammaproteobacteria_un     | Gammaproteobacteria_unc     | Gammaproteobacteria_unclassified        |
| Otu009296 | Bacteria | Proteobacteria | Gammaproteobacteria       | Gammaproteobacteria_un     | Gammaproteobacteria_unc     | Gammaproteobacteria_unclassified        |
| Otu014317 | Bacteria | Proteobacteria | Gammaproteobacteria       | Gammaproteobacteria_un     | Gammaproteobacteria_unc     | Gammaproteobacteria_unclassified        |
| Otu016879 | Bacteria | Proteobacteria | Gammaproteobacteria       | Gammaproteobacteria_un     | Gammaproteobacteria_unc     | Gammaproteobacteria_unclassified        |
| Otu019205 | Bacteria | Proteobacteria | Gammaproteobacteria       | Gammaproteobacteria_un     | Gammaproteobacteria_unc     | Gammaproteobacteria_unclassified        |
| Otu002978 | Bacteria | Proteobacteria | Alphaproteobacteria       | Rhizobiales                | Hyphomicrobiaceae           | Hyphomicrobiaceae_unclassified          |
| Otu007047 | Bacteria | Proteobacteria | Alphaproteobacteria       | Rhizobiales                | Hyphomicrobiaceae           | Hyphomicrobium                          |
| Otu005434 | Bacteria | Proteobacteria | Gammaproteobacteria       | KF-JG30-C25                | KF-JG30-C25_fa              | KF-JG30-C25_ge                          |
| Otu000613 | Bacteria | Proteobacteria | Gammaproteobacteria       | Xanthomonadales            | Rhodanobacteraceae          | Luteibacter                             |
| Otu000785 | Bacteria | Proteobacteria | Gammaproteobacteria       | Xanthomonadales            | Xanthomonadaceae            | Lysobacter                              |
| Otu002554 | Bacteria | Proteobacteria | Gammaproteobacteria       | Betaproteobacteriales      | Methylophilaceae            | Methylobacillus                         |
| Otu003151 | Bacteria | Proteobacteria | Gammaproteobacteria       | Methylococcales            | Methylococcales_unclassifi  | Methylococcales_unclassified            |
| Otu000455 | Bacteria | Proteobacteria | Alphaproteobacteria       | Rhizobiales                | Methyloligellaceae          | Methyloligellaceae_unclassified         |
| Otu020007 | Bacteria | Proteobacteria | Gammaproteobacteria       | Betaproteobacteriales      | Methylophilaceae            | Methylophilaceae_unclassified           |
| Otu002886 | Bacteria | Proteobacteria | Gammaproteobacteria       | Betaproteobacteriales      | Nitrosomonadaceae           | mle1-7                                  |
| Otu000817 | Bacteria | Proteobacteria | Deltaproteobacteria       | Myxococcales               | Myxococcales_unclassified   | Myxococcales_unclassified               |
| Otu006987 | Bacteria | Proteobacteria | Deltaproteobacteria       | NB1-j                      | NB1-j_fa                    | NB1-j_ge                                |
| Otu013985 | Bacteria | Proteobacteria | Gammaproteobacteria       | Nitrosococcales            | Nitrosococcaceae            | Nitrosococcaceae_unclassified           |
| Otu008375 | Bacteria | Proteobacteria | Deltaproteobacteria       | Bdellovibrionales          | Bdellovibrionaceae          | OM27_clade                              |
| Otu005178 | Bacteria | Proteobacteria | Alphaproteobacteria       | Rhizobiales                | Hyphomicrobiaceae           | Pedomicrobium                           |
| Otu000428 | Bacteria | Proteobacteria | Deltaproteobacteria       | Myxococcales               | Polyangiaceae               | Polyangiaceae_unclassified              |
| Otu004699 | Bacteria | Proteobacteria | Gammaproteobacteria       | Salinisphaerales           | Solimonadaceae              | Polycyclovorans                         |
| Otu022008 | Bacteria | Proteobacteria | Gammaproteobacteria       | Salinisphaerales           | Solimonadaceae              | Polycyclovorans                         |
| Otu008301 | Bacteria | Proteobacteria | Proteobacteria_unclassifi | Proteobacteria_unclassifie | Proteobacteria_unclassifier | Proteobacteria_unclassified             |
| Otu014964 | Bacteria | Proteobacteria | Proteobacteria_unclassifi | Proteobacteria_unclassifie | Proteobacteria_unclassifier | Proteobacteria_unclassified             |
| Otu020439 | Bacteria | Proteobacteria | Proteobacteria_unclassifi | Proteobacteria_unclassifie | Proteobacteria_unclassifier | Proteobacteria_unclassified             |
| Otu023420 | Bacteria | Proteobacteria | Proteobacteria_unclassifi | Proteobacteria_unclassifie | Proteobacteria_unclassifier | Proteobacteria_unclassified             |
| Otu025699 | Bacteria | Proteobacteria | Proteobacteria_unclassifi | Proteobacteria_unclassifie | Proteobacteria_unclassifier | Proteobacteria_unclassified             |
| Otu002066 | Bacteria | Proteobacteria | Gammaproteobacteria       | Xanthomonadales            | Rhodanobacteraceae          | Pseudofulvimonas                        |
| Otu008994 | Bacteria | Proteobacteria | Alphaproteobacteria       | Rhizobiales                | Rhizobiaceae                | Rhizobiaceae_unclassified               |
| Otu001091 | Bacteria | Proteobacteria | Alphaproteobacteria       | Rhizobiales                | Rhizobiales_Incertae_Sedis  | Rhizobiales_Incertae_Sedis_unclassified |
| Otu004061 | Bacteria | Proteobacteria | Alphaproteobacteria       | Rhizobiales                | Rhizobiales_unclassified    | Rhizobiales_unclassified                |
| Otu004251 | Bacteria | Proteobacteria | Alphaproteobacteria       | Rhizobiales                | Rhizobiales_unclassified    | Rhizobiales_unclassified                |
| Otu005635 | Bacteria | Proteobacteria | Alphaproteobacteria       | Rhizobiales                | Rhizobiales_unclassified    | Rhizobiales_unclassified                |
| Otu002336 | Bacteria | Proteobacteria | Alphaproteobacteria       | Rhizobiales                | Rhizobiales_unclassified    | Rhizobiales_unclassified                |
| Otu004083 | Bacteria | Proteobacteria | Alphaproteobacteria       | Rhodobacterales            | Rhodobacteraceae            | Rhodobacteraceae_unclassified           |
| Otu001235 | Bacteria | Proteobacteria | Alphaproteobacteria       | Azospirillales             | Azospirillaceae             | Skermanella                             |

|           |          |                 |                     |                     |                          |                                |
|-----------|----------|-----------------|---------------------|---------------------|--------------------------|--------------------------------|
| Otu018633 | Bacteria | Proteobacteria  | Alphaproteobacteria | Azospirillales      | Azospirillaceae          | Skermanella                    |
| Otu006835 | Bacteria | Proteobacteria  | Alphaproteobacteria | Sphingomonadales    | Sphingomonadaceae        | Sphingomonadaceae_unclassified |
| Otu001078 | Bacteria | Proteobacteria  | Alphaproteobacteria | Sphingomonadales    | Sphingomonadaceae        | Sphingomonas                   |
| Otu002979 | Bacteria | Proteobacteria  | Gammaproteobacteria | Xanthomonadales     | Xanthomonadaceae         | Stenotrophomonas               |
| Otu001493 | Bacteria | Proteobacteria  | Deltaproteobacteria | Desulfarculales     | Desulfarculaceae         | uncultured                     |
| Otu002792 | Bacteria | Proteobacteria  | Deltaproteobacteria | Myxococcales        | Sandaracinaceae          | uncultured                     |
| Otu003683 | Bacteria | Proteobacteria  | Alphaproteobacteria | Micropepsales       | Micropepsaceae           | uncultured                     |
| Otu006240 | Bacteria | Proteobacteria  | Deltaproteobacteria | Desulfarculales     | Desulfarculaceae         | uncultured                     |
| Otu000728 | Bacteria | Proteobacteria  | Alphaproteobacteria | Rhizobiales         | uncultured               | uncultured_ge                  |
| Otu002862 | Bacteria | Proteobacteria  | Alphaproteobacteria | Rhizobiales         | uncultured               | uncultured_ge                  |
| Otu006745 | Bacteria | Proteobacteria  | Gammaproteobacteria | Nitrosococcales     | Nitrosococcaceae         | wb1-P19                        |
| Otu025721 | Bacteria | Proteobacteria  | Gammaproteobacteria | Nitrosococcales     | Nitrosococcaceae         | wb1-P19                        |
| Otu003635 | Bacteria | Proteobacteria  | Gammaproteobacteria | Nitrosococcales     | Nitrosococcaceae         | wb1-P19                        |
| Otu005013 | Bacteria | Proteobacteria  | Gammaproteobacteria | Nitrosococcales     | Nitrosococcaceae         | wb1-P19                        |
| Otu012302 | Bacteria | Proteobacteria  | Gammaproteobacteria | Xanthomonadales     | Xanthomonadaceae         | Xanthomonadaceae_unclassified  |
| Otu005994 | Bacteria | Proteobacteria  | Gammaproteobacteria | Xanthomonadales     | Xanthomonadaceae         | Xanthomonadaceae_unclassified  |
| Otu006098 | Bacteria | Proteobacteria  | Gammaproteobacteria | Xanthomonadales     | Xanthomonadaceae         | Xanthomonadaceae_unclassified  |
| Otu010061 | Bacteria | Proteobacteria  | Gammaproteobacteria | Xanthomonadales     | Xanthomonadales_unclassi | Xanthomonadales_unclassified   |
| Otu004166 | Bacteria | Proteobacteria  | Gammaproteobacteria | Xanthomonadales     | Xanthomonadales_unclassi | Xanthomonadales_unclassified   |
| Otu003610 | Bacteria | Rokubacteria    | NC10                | Rokubacteriales     | Rokubacteriales_fa       | Rokubacteriales_ge             |
| Otu007537 | Bacteria | Rokubacteria    | NC10                | Rokubacteriales     | Rokubacteriales_fa       | Rokubacteriales_ge             |
| Otu001669 | Bacteria | Verrucomicrobia | Verrucomicrobiae    | Chthoniobacteriales | Chthoniobacteraceae      | Candidatus_Udaeobacter         |
| Otu007528 | Bacteria | Verrucomicrobia | Verrucomicrobiae    | Opitutales          | Opitutaceae              | Opitutaceae_unclassified       |
| Otu006051 | Bacteria | Verrucomicrobia | Verrucomicrobiae    | Pedosphaerales      | Pedosphaeraceae          | Pedosphaeraceae_ge             |
| Otu009641 | Bacteria | Verrucomicrobia | Verrucomicrobiae    | Pedosphaerales      | Pedosphaeraceae          | Pedosphaeraceae_ge             |
| Otu014325 | Bacteria | Verrucomicrobia | Verrucomicrobiae    | Pedosphaerales      | Pedosphaeraceae          | Pedosphaeraceae_ge             |

### ***P. destructans* positive Indicator taxa**

#### **OTU    Kingdo Phylum**

|           |          |                |                     |                             |                             |                                  |
|-----------|----------|----------------|---------------------|-----------------------------|-----------------------------|----------------------------------|
| Otu000321 | Bacteria | Actinobacteria | Actinobacteria      | Micrococcales               | Micrococcaceae              | Micrococcaceae_unclassified      |
| Otu000339 | Bacteria | Actinobacteria | Actinobacteria      | Micrococcales               | Micrococcaceae              | Micrococcaceae_unclassified      |
| Otu000640 | Bacteria | Actinobacteria | Actinobacteria      | Micrococcales               | Micrococcaceae              | Micrococcaceae_unclassified      |
| Otu000161 | Bacteria | Actinobacteria | Actinobacteria      | Actinobacteria_unclassified | Actinobacteria_unclassified | Actinobacteria_unclassified      |
| Otu001641 | Bacteria | Proteobacteria | Gammaproteobacteria | Enterobacteriales           | Enterobacteriaceae          | Enterobacteriaceae_unclassified  |
| Otu002065 | Bacteria | Actinobacteria | Actinobacteria      | Micrococcales               | Micrococcaceae              | Micrococcaceae_unclassified      |
| Otu001303 | Bacteria | Actinobacteria | Actinobacteria      | Micrococcales               | Micrococcaceae              | Micrococcaceae_unclassified      |
| Otu002167 | Bacteria | Actinobacteria | Actinobacteria      | Micrococcales               | Micrococcaceae              | Micrococcaceae_unclassified      |
| Otu001271 | Bacteria | Actinobacteria | Actinobacteria      | Micrococcales               | Micrococcaceae              | Micrococcaceae_unclassified      |
| Otu000693 | Bacteria | Actinobacteria | Actinobacteria      | Micrococcales               | Micrococcaceae              | Micrococcaceae_unclassified      |
| Otu001840 | Bacteria | Actinobacteria | Actinobacteria      | Micrococcales               | Micrococcaceae              | Micrococcaceae_unclassified      |
| Otu000849 | Bacteria | Proteobacteria | Gammaproteobacteria | Gammaproteobacteria_un      | Gammaproteobacteria_unc     | Gammaproteobacteria_unclassified |
| Otu000505 | Bacteria | Actinobacteria | Actinobacteria      | Micrococcales               | Micrococcaceae              | Micrococcaceae_unclassified      |
| Otu002001 | Bacteria | Actinobacteria | Actinobacteria      | Micrococcales               | Micrococcaceae              | Micrococcaceae_unclassified      |
